# Supplementary material
Source: PubMed Central journal article supplement (PMC6431224)
Supplement: pnas.1900338116.sapp.pdf [file pnas.1900338116.sapp.pdf]

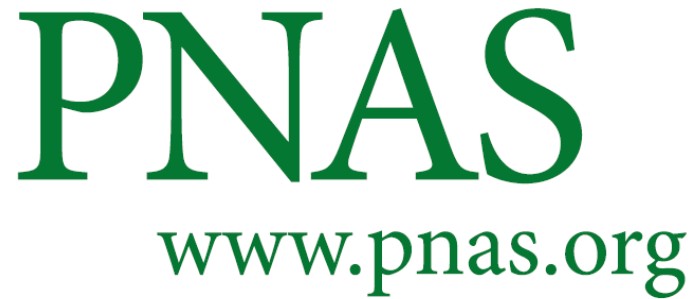

## Supplementary Information for

MicroRNA-186-5p controls GluA2 surface expression and synaptic scaling in hippocampal neurons

Mariline Silva<sup>1,2</sup>, Beatriz Rodrigues<sup>1,2</sup>, Joana Fernandes<sup>1</sup>, Sandra D Santos<sup>1</sup>,  
Laura Carreto<sup>3</sup>, Manuel Santos<sup>3</sup>, Paulo Pinheiro<sup>1</sup>, Ana Luísa Carvalho<sup>1,4</sup>

Ana Luísa Carvalho  
Email: [alc@cnc.uc.pt](mailto:alc@cnc.uc.pt)

### **This PDF file includes:**

SI Materials and Methods  
Figs. S1 to S7  
Tables S1 to S3  
References for SI reference citations

## SI Materials and Methods

**General materials.** Horse serum (HS), gentamycin, Neurobasal Medium (NBM), Fetal Bovine Serum (FBS), Lipofectamine LTX with Plus reagent, Opti-MEM, RNase-free water and trypsin were purchase from GIBCO, as part of Thermo Fisher Scientific. Cytosine arabinoside, kynurenic acid, glutamine, Minimum Essencial Medium (MEM) and Dulbecco's Modified Eagle Medium (DMEM) were purchased from Sigma-Aldrich, as part of Merck. SM1 supplement was acquired from STEMCELL Technologies. The drugs used in this study were: GYKI-52466 [4-(8-Methyl-9H-1,3-dioxolo[4,5-h][2,3]benzodiazepin-5-yl)-benzenamine] purchased from Abcam; MK-801 [(5R,10S)-(+)-5-methyl-10,11-dihydro-5H-dibenzo[a,d]cyclohepten-5,10-imine], TTX (tetrodotoxin), picrotoxin, APV (2-amino-5-phosphonopentanoic acid) and Naspn trihydrochloride (N-[3-[[4-[(3-Aminopropyl)amino]butyl]amino]propyl]-1-naphthaleneacetamide trihydrochloride) purchased from Tocris Bioscience. The fluorescent mounting medium was acquired from DAKO, as part of Agilent Technologies. All other chemical reagents were obtained from Sigma-Aldrich, as part of Merck; Thermo Fisher Scientific and NZYTech.

**High-density neuronal cultures.** Cortices or hippocampi of E17-E19 Wistar rat embryos were dissected, treated with 0.06% (wt/vol) trypsin for 15 min at 37°C and dissociated in  $\text{Ca}^{2+}$  and  $\text{Mg}^{2+}$ -free Hank's balanced salt solution (HBSS; in mM: 5.36 KCl, 0.44  $\text{KH}_2\text{PO}_4$ , 137 NaCl, 4.16  $\text{NaHCO}_3$ , 0.34  $\text{Na}_2\text{HPO}_4 \cdot 2\text{H}_2\text{O}$ , 5 glucose, 1 sodium pyruvate, 10 HEPES and 0.001% phenol red). Cells were seeded in neuronal plating medium (MEM supplemented with 10% horse serum, 0.6% glucose and 1 mM pyruvic acid) onto coverslips or plates previously coated with poly-D-lysine (0.1 mg/ml), with variable densities according to the experimental objective: for electrophysiological proposes,  $\sim 4.7 \times 10^4$  cells per  $\text{cm}^2$  in 12-well plates containing 18 mm coverslips;  $\sim 9 \times 10^4$  cells per  $\text{cm}^2$  in 6-well plates for biochemical experiments; for luciferase experiments,  $\sim 7.7 \times 10^4$  hippocampal cells per  $\text{cm}^2$  for 12-well plates or  $\sim 9 \times 10^4$  cortical cells per  $\text{cm}^2$  for 12-well. After 2-4h, the plating media was replaced for neuronal culture medium (NBM supplemented with SM1 supplement [1:50 dilution], 0.55 mM glutamine, 0.12 mg/ml gentamycin); in the first week, the neuronal culture medium used in hippocampal cultures was also supplemented with 25  $\mu\text{M}$  glutamate. The cultures were maintained at 37°C in humidified incubator with 5%  $\text{CO}_2$  and 95% air, and fed once per week with neuronal culture medium by replacing one-third of the medium per well. All animal procedures were reviewed and approved by ORBEA and Direcção Geral de Veterinária (DGAV), Portugal.

**Low-density hippocampal cultures (Banker cultures).** For imaging experiments, low-density cultures were prepared as previously described by Goslin and colleagues (1). Hippocampi were dissected and dissociated, as described for high-density neuronal cultures. Cells were then plated in neuronal plating medium onto poly-D-lysine coated coverslips (0.1 mg/ml) at the final density of  $3 \times 10^5$  cells per 60 mm culture dishes. After 2-4h, coverslips were flipped over an astroglial feeder layer (grown in MEM supplemented with 10% horse serum, 0.6% glucose, and 1% penicillin-streptomycin) and maintained in neuronal culture medium (NBM supplemented with SM1 supplement [1:50 dilution], 0.55 mM glutamine, 0.12 mg/ml gentamycin, 25  $\mu\text{M}$  glutamate). The neuronal cultures were treated with 5  $\mu\text{M}$  cytosine arabinoside at DIV 2-3, to prevent glia overgrowth. The cultures were maintained in humidified incubator at 37°C with 5%  $\text{CO}_2$  and 95% air, and fed once

per week with neuronal culture medium without glutamate, by replacing one-third of the medium per dish.

All animal procedures were reviewed and approved by ORBEA and Direcção Geral de Veterinária (DGAV), Portugal.

***In vitro* paradigm.** Hippocampal neurons were incubated with 50  $\mu$ M of the AMPAR antagonist GYKI-52466 and 10  $\mu$ M of the NMDAR antagonist MK-801. Incubation periods are stated in the image captions and depend on the experimental design.

**Immunofluorescence.** For surface GluA1 labelling, live 15-16 DIV hippocampal neurons were incubated with primary antibody sheep monoclonal anti-GluA1 N-terminal (Residues 271-285 of rat S453B) (1:200; kindly offered by Dr. Andrew Irving from University of Dundee, Scotland), diluted in conditioned neuronal culture medium for 10 min at room temperature. Neurons were then fixed in 4% PFA / 4% sucrose for 15 min, permeabilized with 0.25% Triton X-100 for 5 min at 4°C and blocked with 10% BSA for 30 min at 37°C. Coverslips were then incubated with alexa Fluor® 488 conjugated anti-sheep (1:1000; Invitrogen Molecular Probes) diluted in 3% BSA, overnight at 4°C. Afterwards, coverslips were incubated with chicken polyclonal anti-MAP2 (1:5000; Abcam) and guinea pig polyclonal anti-VGluT1 (1:5000; Merck Millipore) in 3% BSA for either 2h at 37°C or overnight at 4°C. The coverslips were then incubated with secondary antibodies diluted in 3% BSA for either 45 min at 37°C or overnight at 4°C: AMCA-conjugated anti-chicken (1:200; Jackson ImmunoResearch) and alexa Fluor® 647 conjugated anti-guinea pig (1:1000; Invitrogen Molecular Probes). Coverslips were mounted with fluorescence mounting media.

To label surface GluA2, 15-16 DIV hippocampal neurons were fixed with cold 4% PFA / 4% sucrose for 15 minutes, blocked with 10% HS for 30 min at 37°C and incubated with mouse monoclonal anti-GluA2 N-terminal (clone 6C4) (1:100; Merck Millipore) diluted in 5% HS overnight at 4°C. Then, coverslips were incubated with anti-mouse secondary antibody diluted in 5% HS for 45 min at 37°C: alexa Fluor® 488 conjugated anti-mouse (1:1000; Invitrogen Molecular Probes) or alexa Fluor® 568 conjugated anti-mouse (1:1000; Invitrogen Molecular Probes). Afterwards, neurons were permeabilized with 0.25% Triton X-100 and blocked with 10% HS for 30 min at 37°C and MAP2 and VGluT1 were labelled as described before. All solutions were prepared in PBS.

**Total RNA isolation and RNA quality analysis.** Total RNA was extracted from high-density cultures of hippocampal neurons, after 9 h or 26 h of blockade of AMPAR and NMDAR, with TRIzol (Invitrogen, as part of Thermo Fisher Scientific) reagent following the manufacturer's specifications. Briefly, TRIzol reagent was added to each well of a 6-well plate (each experimental condition comprises two wells of a 6-well plate) and the content was homogenized by pipetting up and down several times. The lysate was collected and incubated for 5 min. Chloroform was then added for phase separation, the mix was incubated for 2-3 min and centrifuged. The supernatant was collected and isopropanol was added to promote RNA precipitation, followed by a 10 min incubation and subsequent centrifugation. The precipitated RNA was washed with 75% ethanol, centrifuged, air-dried and resuspended in RNase-free water. RNA concentration was determined using a NanoDrop 2000c/2000 UV-Vis Spectrophotometer (Thermo Fisher Scientific). The RNA were stored at -80°C until further use.

RNA quality and integrity were evaluated using the Experion automated gel-electrophoresis system (Bio-Rad), following manufacturer's instructions. The results

indicated ribosomal ratio and RNA quality indicator (RQI) number. High quality total RNA samples with an RQI 8-10 were selected for microarray analysis.

**Microarray hybridization and data analysis.** Microarray hybridization and data processing was performed as previously described by Fernandes *et al* (2). RNA extracts from each replicate were amplified and labelled with Cy-3-CTP using the Low Input Quick Amp Labelling kit (Agilent). Hybridizations were performed following manufacturer's instructions for One-Color Microarray-Based Gene Expression Analysis (Agilent), using whole-genome Rat GE 4x44K v3 Microarrays. Images were obtained using the Agilent G2565AA microarray scanner and scanned images were quantified and analyzed using Agilent Feature Extraction 10.5.1.1 software and the GE1\_105\_Dec08 protocol. The signal intensity was aligned and normalized between microarrays by centering the signal distribution median using BRB-ArrayTools v3.8.1. RNA from three independent cultures was used as biological replicates. The microarray data was submitted to GEO database and has been given the accession number GSE111384.

TIGR MultiExperiment Viewer (MeV) v4.6 was used for statistical analysis of the data. Student's t-test was used to determine differentially expressed genes ( $p$ -value $\leq$ 0.05). Moreover, only differentially expressed genes with a fold change above 2.0 were considered differentially expressed and included in further analyses. To study the expression pattern of altered gene sets between both time points, a Venn diagram analysis was performed (<http://bioinfo.genotoul.fr/jvenn/example.html>)(3).

For gene ontology (GO) enrichment analysis, the list of differentially expressed genes from each condition was imported to Gene Ontology Consortium database, released 2017-12-27 (<http://www.geneontology.org/>)(4). Ontological classes from biological significance were selected manually. Graphical representation comprises statistically enriched, non-redundant, ontology classes directly related with neuroscience and synaptic plasticity.

**Prediction of putative miRNA regulators.** For prediction of putative miRNA regulators, GO categories of known biological and synaptic significance were selected and putative miRNA regulators were predicted for those genes using three different databases: miRanda (August 2010 Release, updated in November 2010; <http://www.microna.org/microna/getMirnaForm.do>)(5); TargetScan (Version 6.1 released in March 2012; [http://www.targetscan.org/vert\\_61/](http://www.targetscan.org/vert_61/))(6); and MirTarget2 (Updated in April 2012; <http://mirdb.org/miRDB/>)(7). The miRNAs selected for screening were predicted in at least 2 of these databases and according to the following features: synaptic relevance of the putative targets, number of putative targets and miRNA:mRNA target score.

**miRNA screening.** Total RNA was extracted from 15-DIV high-density cultures of rat hippocampal neurons, in control conditions or submitted to incubation with GYKI-52466 and MK-801 for 2h, 4h, 9h or 24h (each experimental condition comprises one well of a 6-well plate), with miRCURY™ RNA Isolation Kits - Cell & Plant (Exiqon), according to manufacturer's instructions. RNA concentration was determined using a NanoDrop 2000c/2000 UV-Vis Spectrophotometer. The samples were stored at -80°C until further use. cDNA was synthesized by reverse transcription using the Universal cDNA Synthesis Kit II, according to manufacturer instructs, in T100 thermal cycler (Bio-Rad). At the end, the undiluted cDNA was stored in low-nucleic acid binding tubes, at -20°C, for up to 5 weeks. Screening of selected miRNAs was performed using Pick&Mix microRNA PCR Panel (Exiqon, as part of Qiagen) according to manufacturer instructs. This reaction was performed in a Bio-Rad iCycler Thermal Cycler with iQ5 Multicolor Real-Time PCR Detection System (Bio-Rad). Data was analyzed using Exiqon GenEx qPCR analysis

software (Exiqon), according to manufacturer's instructions. Data calibrating between plates was performed, followed by quality control assessment (internal amplification control, outlier analysis, negative controls, cut-off, clean missing data) and normalization to the global mean of all expressed miRNAs.

To assess miR-92a-3p levels, cDNA was synthesized by reverse transcription, using the miRCURY LNA RT Kit, and analyzed using miRCURY LNA SYBR Green PCR Kit and LNA PCR primer sets (Exiqon, as part of Qiagen), according to manufacturer instructions. This reaction was performed in a Bio-Rad iCycler Thermal Cycler with iQ5 Multicolor Real-Time PCR Detection System (Bio-Rad). Samples were assayed using the relative standard curve method and miR-92a-3p levels were normalized to miR-99b-5p and UniSp6. Data was analyzed using GenEx qPCR analysis software, according to manufacturer's instructions.

#### **Prediction of putative miRNA targets and gene ontology enrichment analysis.**

Putative miRNA targets were predicted using TargetScan, version 7.1 ([http://www.targetscan.org/vert\\_71/docs/help.html](http://www.targetscan.org/vert_71/docs/help.html)) (8). Gene ontology analysis of biological process and cellular component were performed using the Gene Ontology Consortium database, released 2017-02-28; and PANTHER pathways analysis was performed using PANTHER version 11.1 Released 2016-10-24 (<http://www.geneontology.org/>) (4). Ontological classes from biological significance were selected manually. Graphical representation comprises statistically enriched, non-redundant, ontology classes directly related with neuroscience and synaptic plasticity.

**Neuron transfection.** Primary cultures of neurons were transiently transfected using the calcium phosphate transfection protocol adapted from Jiang and colleagues (9). Briefly, neurons were treated with 2 mM kynurenic acid in conditioned neuronal culture medium, for 20 min at 37°C, while DNA precipitates were prepared. For DNA precipitate preparation, plasmid DNAs were diluted in Tris-EDTA transfection buffer (in mM: 10 Tris-HCl, 1 EDTA, at pH 7.3), followed by the addition of CaCl<sub>2</sub> solution (2.5 M in 10 mM HEPES) drop-wise to the diluted DNA, to a final concentration of 250 mM CaCl<sub>2</sub>. This mix was added to an equivalent volume of HEPES-buffered saline transfection solution (in mM: 274 NaCl, 10 KCl, 1.4 Na<sub>2</sub>HPO<sub>4</sub>, 11 dextrose, 42 HEPES, at pH 7.2), a small fraction at a time (1/8<sup>th</sup>) and the mixture was vortexed gently. The precipitates were then added dropwise to pre-conditioned neurons and the cultures were incubated with the precipitates for 2-3 h. After incubation, remaining DNA precipitates were dissolved by incubating the neurons with acidified neuron culture medium (in mM: 2 kynurenic acid, ~5 HCl final concentration) for 15-20 min at 37°C. In Banker cultures, coverslips were returned to the original astroglial plate; in high-density cultures, the acidified media was replaced by the remaining conditioned neuronal culture media. All incubations were performed at 37°C, in a humidified incubator with 5% CO<sub>2</sub> and 95% air.

For validation of anti-GluA2 NT antibody, recombinant GluA2 was co-transfected with a fluorescent reporter, GFP, in 1:1 ratio to a total of 4 µg per coverslip. For luciferase studies performed in hippocampal cultures, 3'UTR target expression clone for either control or *Gria2* 3'UTR was co-transfected with a fluorescent reporter, mCherry, in the ratio of 6 µg to 2 µg per well. For *Gria2* target validation in cortical cultures, 3'UTR target expression plasmids were co-transfected with either miExpress Precursor miRNA construct or miArrest miRNA Inhibitors constructs, in 1:1 ratio to a total of 8 µg per well. For imaging or electrophysiology experiments using pre-miR-186 or miR-186-5p inhibitors (and their respective scramble controls), 2-4 µg of DNA were used per coverslip and plasmids were allowed to express for 6 days for imaging experiments or 4 days for electrophysiology experiments.

DNA constructs encoding recombinant GluA1 and GluA2 were a kind gift from Juan Lerma, Instituto de Neurociencias de Alicante, Spain. DNA constructs encoding shRNAs targeting GluA1 and GluA2 were a kind gift from Roger Nicoll, University of California, San Francisco, USA. DNA constructs encoding pre-miR-186 or miRNA-186-5p (and the respective scramble controls) were purchased from Genecopoeia. Fluorescent reporter plentilox3.7 vectors encoding either mCherry or GFP were a kind gift from Ann Marie Craig, University of British Columbia, Vancouver, Canada.

**Cell lines culture and transfection.** HEK293T cells were used to perform the luciferase assay. This cell line was maintained at 37°C in a humidified incubator with 5% CO<sub>2</sub> and 95% air, cultured in Dulbecco's modified Eagle's medium, supplemented with 10% FBS, 1% penicillin/streptomycin and 44 mM NaHCO<sub>3</sub> at pH 7.2 and diluted 1:5 every three days. HEK293T cells were transfected using Lipofectamine LTX, according to manufacturer's instructions. For the co-transfection of luciferase reporter with either expression of pre-miRNA or miRNA inhibitors (or their respective scrambled constructs), 2 µg of DNA were used per well, in a 1:1 ratio. The complexes were added to the HEK293T cells (with a confluency of 70-90%) and incubated for 4-5 h, in a humidified incubator at 37°C with 5% CO<sub>2</sub> and 95% air. Afterwards, media was replaced with fresh culture media and the cells were returned to the incubator. The plasmids were expressed for 72 h prior to media collection.

**Luciferase assay.** Secrete-Pair Dual Luminescence Assay Kit (Genecopoeia) was used as recommended by the manufacturer. The SEAP signal was used to normalize all experimental conditions according to their transfection efficiency, by calculating the ratio of GLuc/SEAP luminescence intensities. For experiments conducted in primary cultures of hippocampal neurons, 14-15 DIV neurons were transfected, culture medium was replaced with conditioned media ~24h after transfection and neurons were kept in control conditions or incubated with 50 µM GYKI-52466 and 10 µM MK-801 for 24h. For experiments conducted in HEK293T cell line and cortical cultures (transfected at 7-8 DIV), culture media was replaced ~24 h after transfection and plasmids were expressed for 48h more.

**Site-directed mutagenesis.** PCR reaction was performed using PrimeSTAR GXL DNA Polymerase (Takara Bio Inc), following manufacturer's instructions. Primers were design in the web-based QuikChange Primer Design Software, from Agilent. The following primer set was used: 5' - taa ttg aat att gtt att aaa act tta atg tat cct atv dvt taa cct ttg gtg tta ata tga aac tac ttg gtg atg c - 3' and 5' - gca tca cca agt agt ttc ata tta aca cca aag gtt aab hba tag gat aca tta aag ttt taa taa caa tat taa att a - 3'.

**mEPSCs recording and analysis.** Whole-cell voltage clamp recordings were made from 15 DIV hippocampal neurons plated on coverslips at room temperature. The recording chamber was mounted on a fixed-stage upright microscope Zeiss Axio Examiner.D1 (Carl Zeiss) and perfused at 0.31 mL per min with extracellular solution (in mM: 140 NaCl, 2.4 KCl, 10 HEPES, 10 glucose, 0.25 CaCl<sub>2</sub>, 10 MgCl<sub>2</sub>, at pH 7.3 and osmolarity 300-310 mOsm, supplemented with 100 µM picrotoxin, 500 nM TTX, 50 µM APV). Fluorescent and transmission illumination (HBO 100) and a camera (Q-imaging) were used to visualize neurons on a computer monitor using Q-capture Pro 7 software interface. Patch electrodes (4-6 mΩ) were made from borosilicate glass (Science Products) and filled with the intracellular solution (in mM: 107 CsMeSO<sub>3</sub>, 10 CsCl, 3.7 NaCl, 5 TEA-Cl, 20 HEPES, 0.2 EGTA, 4 Mg<sup>2+</sup>-ATP, 0.3 Na<sup>2+</sup>-GTP, corrected to pH 7.3 with CsOH and osmolarity 298-300 mOsm; for the evaluation of GluA2-lacking AMPAR, the following solution was used

115 CsMeSO<sub>3</sub>, 20 CsCl, 2.5 MgCl<sub>2</sub>.6H<sub>2</sub>O, 10 HEPES, 0.6 EGTA, 10 Na-phosphocreatine, 4 Na<sup>2+</sup>-ATP salt and 0.4 Na<sup>2+</sup>-GTP salt, corrected to pH 7.3 with CsOH and osmolarity 295-298 mOsm). Cells were voltage-clamped at -70 mV and capacitances automatically compensated. mEPSCs were amplified using Multiclamp 700B amplifier, digitized through a Digidata 1550 A plus HumSilencer and acquired using Camplex 10.5 and multiclamp 700B commander software (Molecular Device). During 3 min, AMPAR-mediated mEPSC events were recorded in a gap-free acquisition mode with a sampling rate of 25 kHz after signal filtering at 2.8 kHz. Access resistance (12-22 MΩ) was monitored before and after voltage clamp recordings and was not compensated for. Clampfit software was used to detect the events and quantify amplitude, frequency and decay tau of mEPSCs recordings. Only events larger than 2x the recording noise and decay tau between 2 and 30 ms were considered. For each cell, the median value was obtained and averaged across all recorded cells. For analysis of AMPARs composition, hippocampal neurons were pre-incubated with 20 μM of the selective Ca<sup>2+</sup>-permeable AMPAR antagonist Naspam for 30 min-60 min, and then recorded in the presence of the drug.

## SI Figures

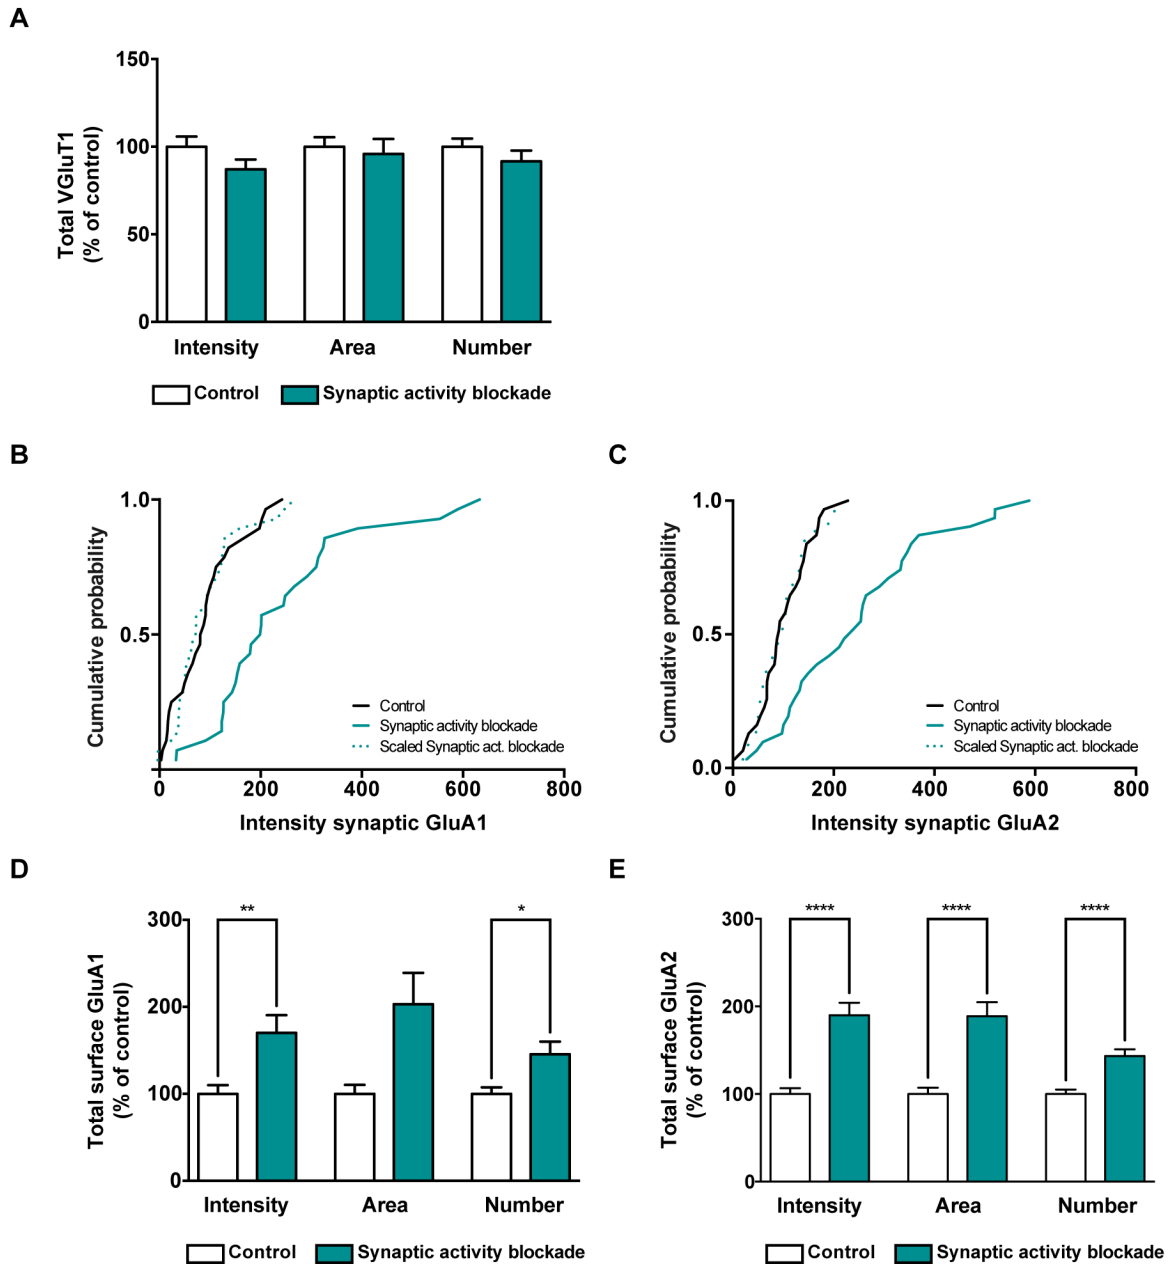

**Fig. S1.** Chronic blockade of AMPARs and NMDARs induces synaptic upscaling of GluA1 and GluA2. (A) Blockade of AMPARs and NMDARs with 50  $\mu$ M GYKI-52466 and 10  $\mu$ M MK-801 for 24h had no effect in the intensity, area or number of total VGluT1 clusters per dendritic length ( $n=35$  neurons from 3 independent experiments, Mann-Whitney test). (B) Cumulative probability histograms of synaptic GluA1 intensities show the multiplicative effect of synaptic scaling ( $n=28$  neurons from 3 independent experiments). (C) Cumulative probability histograms of synaptic GluA2 intensities also exhibit the multiplicative effect associated with synaptic scaling ( $n=31$  neurons from 3 independent experiments). (D)



Synaptic activity suppression with 50  $\mu$ M GYKI-52466 and 10  $\mu$ M MK-801 for 24h increased the intensity and number of total cell surface GluA1 clusters per dendritic length (n=29-30 neurons from 3 independent experiments; Mann-Whitney test: \* $p \leq 0.05$ , \*\* $p \leq 0.01$ ). (E) Chronic blockade of AMPARs and NMDARs also promoted an increase in the intensity, area and number of total GluA2 clusters per dendritic length (n=31-33 neurons from 3 independent experiments; Mann-Whitney test: \*\*\*\* $p \leq 0.0001$ ).

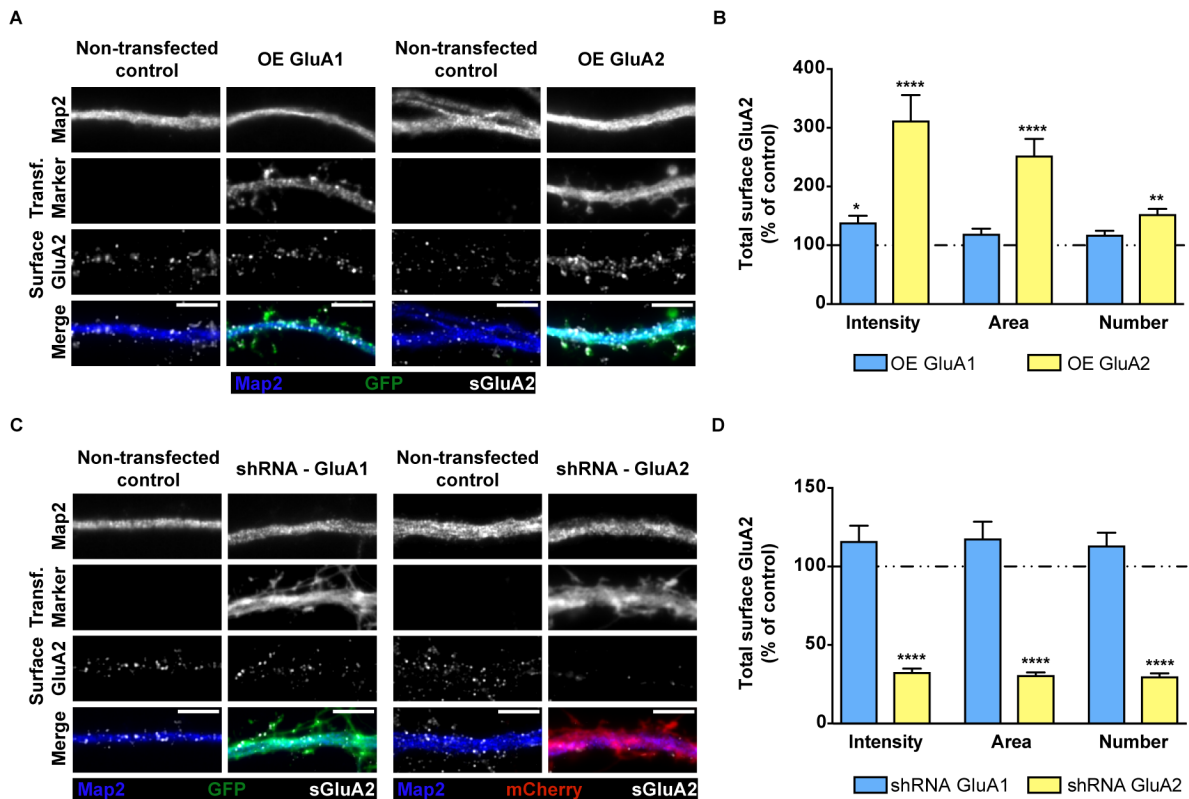

**Fig. S2.** Anti-GluA2 N-terminal (NT) antibody (clone 6C4 from Merck) specifically labels the GluA2 subunit of the AMPARs. (A - B) Anti-GluA2 NT antibody detects specifically GluA2 overexpression. (A) Representative images of 15 DIV hippocampal neurons expressing recombinant GluA1 or GluA2 constructs for 5 days and stained for surface GluA2 and MAP2. Transfected neurons were identified by expression of a fluorescent reporter. Scale bar: 5 $\mu$ m. (B) Neurons expressing recombinant GluA1 presented a small increase in the intensity of surface GluA2 clusters, with no effects in area and number in comparison with non-transfected neurons, per dendritic length (n=31-32 cells per condition from 3 independent experiments; Mann-Whitney test: \*p $\leq$ 0.05). Neurons expressing recombinant GluA2 presented a dramatic increase in the intensity, area and number of labeled surface GluA2 clusters relatively to non-transfected neurons, per dendritic length (n=21 cells per condition from 2 independent experiments; Mann-Whitney test: \*\*p $\leq$ 0.01, \*\*\*\*p $\leq$ 0.0001). (C - D) Anti-GluA2 NT antibody specifically displays silencing of GluA2. (C) Representative images of 15 DIV hippocampal neurons expressing shRNAs targeting GluA1 or GluA2 for 5 days and stained for surface GluA2 and MAP2. Transfected neurons were identified by expression of fluorescent reporter. Scale bar: 5 $\mu$ m. (D) shRNA targeting GluA1 expressing neurons had surface GluA2 clusters with similar intensity, area and number to non-transfected neurons, per dendritic length (n=28-29 cells per condition from 3 independent experiments; Mann-Whitney test). Neurons expressing shRNA for GluA2 had surface GluA2 clusters with decreased intensity, area and number in comparison with non-transfected neurons, per dendritic length (n=30-32 cells per condition from 3 independent experiments; Mann-Whitney test: \*\*\*\*p $\leq$ 0.0001).

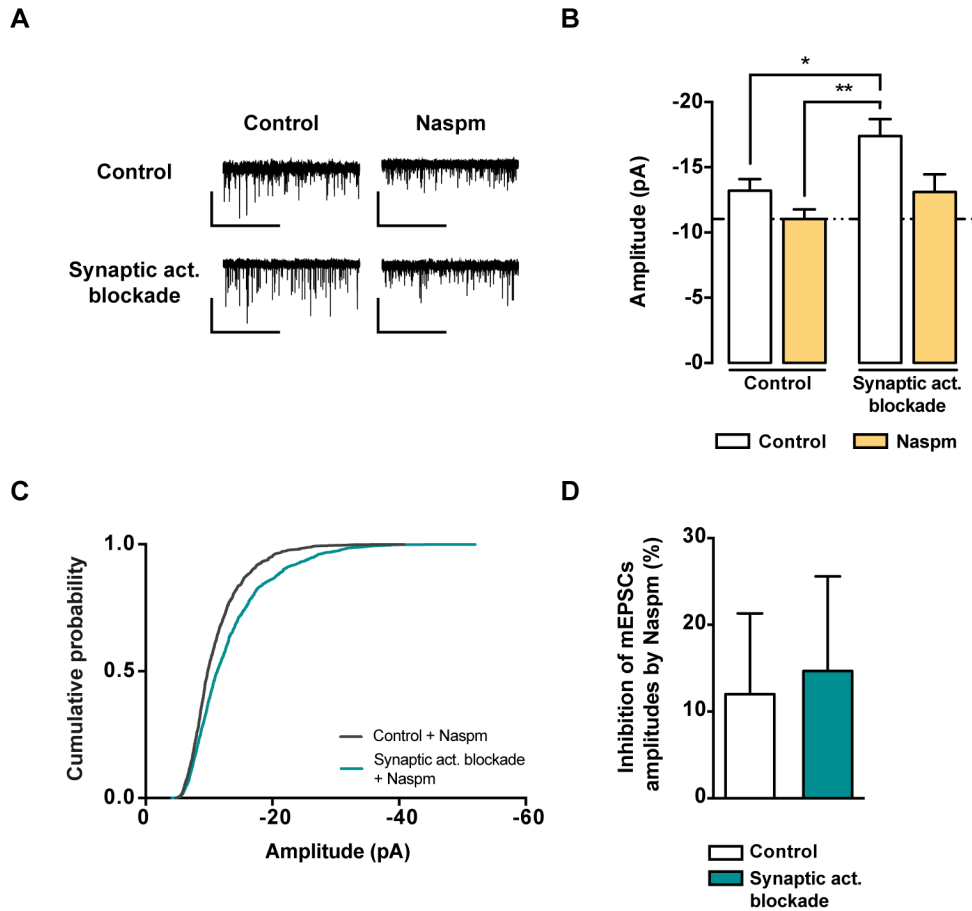

**Fig. S3.** AMPARs subunits GluA1 and GluA2 contribute to upscaling upon chronic blockade of synaptic activity. (A) Representative whole-cell current traces of AMPAR-mediated mEPSCs from 15 DIV hippocampal neurons in control conditions or treated with 50  $\mu$ M GYKI-52466 and 10  $\mu$ M MK-801 for 24h. Prior to recording, neurons from both conditions were pre-incubated with 20  $\mu$ M Naspmm for at least 30 min or maintained under control conditions (scale bars: vertical, 20 pA; horizontal, 5 s). (B). Chronic blockade of synaptic activity increased the amplitude of AMPAR-mediated mEPSCs in neurons untreated with calcium permeable AMPAR blocker Naspmm. Neurons under prolonged synaptic activity suppression treated with Naspmm presented a tendency to have increased amplitude of mEPSCs in comparison with control neurons exposed to Naspmm ( $n=8-19$  neurons per experimental condition, from 7 independent preparations; 2-way ANOVA with Tukey's multiple comparison test:  $*p\leq 0.05$ ,  $**p\leq 0.01$ ). (C) Cumulative probability histograms of mEPSCs amplitude showed synaptic upscaling upon chronic blockade of AMPARs and NMDARs in neurons treated with Naspmm ( $n=1200$  events recorded from 8 cells per condition, from 7 independent preparations). (D) Neurons under chronic synaptic activity blockade had similar percentage of inhibition with Naspmm to control neurons ( $n=8$  cells per experimental condition from 5 independent experiments; Mann-Whitney test).

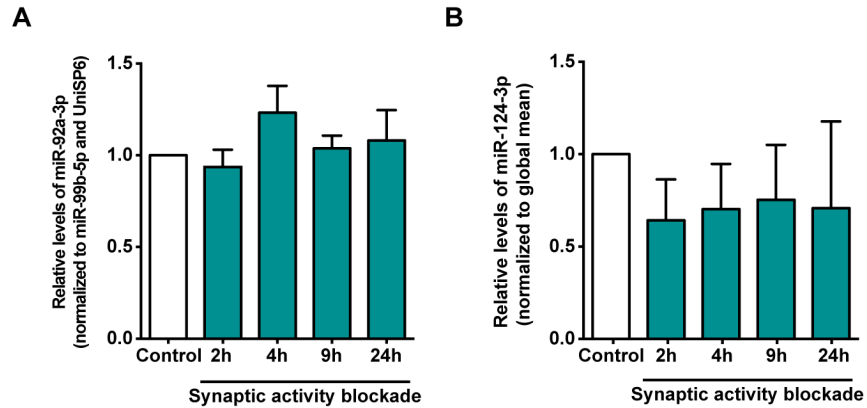

**Fig. S4.** Relative levels of miR-92a-3p (A) and miR-124-3p (B) were not altered with chronic blockade of AMPARs and NMDARs. The levels of these miRNAs were evaluated in RNA extracted from hippocampal cultures with 15 DIV in control conditions or pre-incubated with 50  $\mu$ M GYKI-52466 and 10  $\mu$ M MK-801 for 2h, 4h, 9h or 24h. (A) Relative levels of miR-92a-3p were assessed using quantitative real-time PCR and normalized to miR-99b-5p and UniSp6 (n=6 independent experiments; one sample t test). (B) Relative levels of miR-124-3p were assessed with a Pick & Mix PCR Panel and normalized to global mean (n=3-4; one sample t test).

A

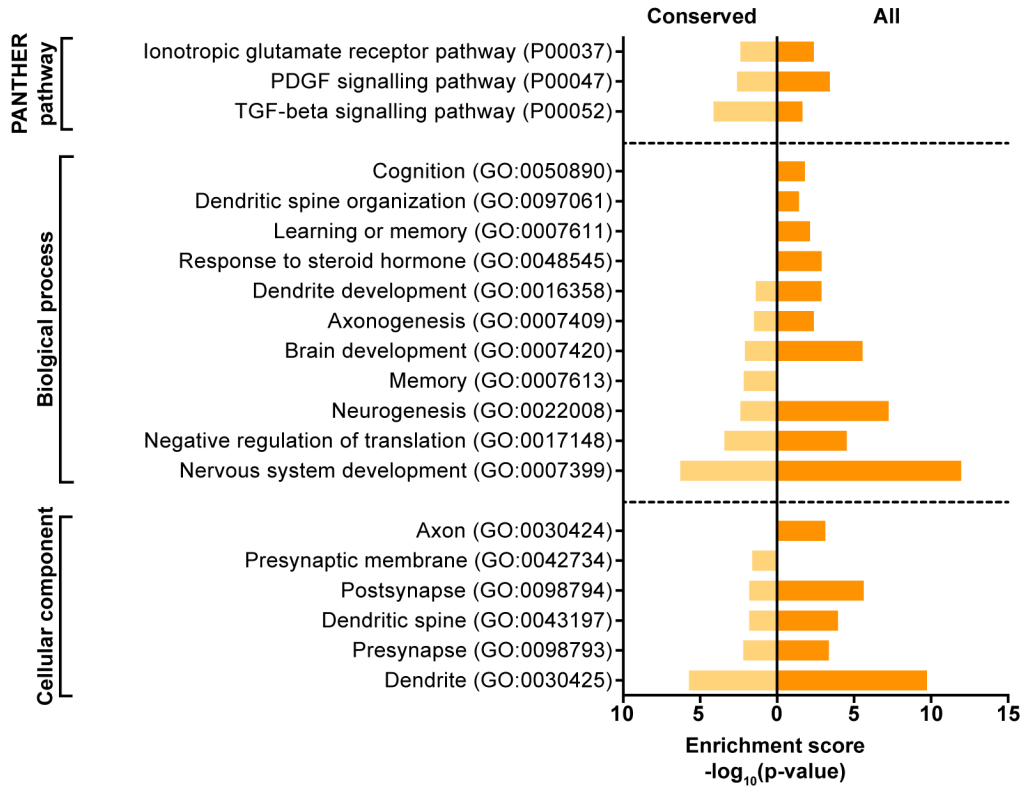

B

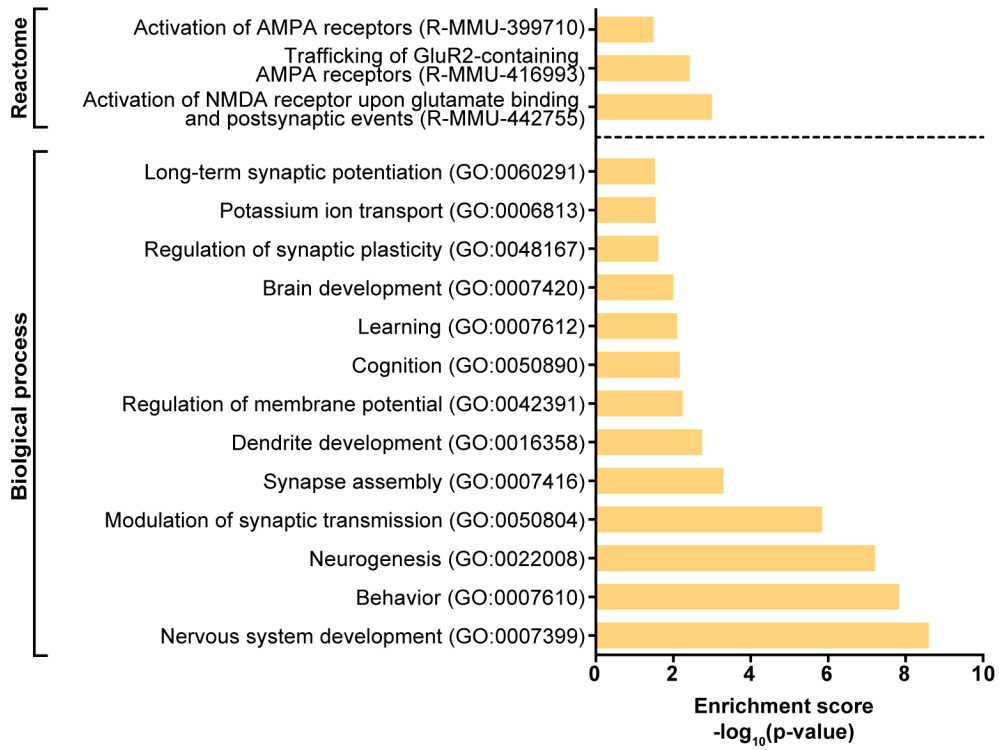

**Fig. S5.** Gene ontology enrichment analyses of miR-186-5p putative targets and precipitated AGO:miR-186-5p bound targets implicate miR-186-5p in neuronal

development and synaptic plasticity. (A) Gene ontology analysis of conserved and poorly conserved putative targets of miR-186-5p (predicted with TargetScan7.1) uncovers an enrichment of putative targets with neurobiological relevance. Gene ontology enrichment analysis was performed for PANTHER pathways, biological process and cellular component using the Gene Ontology Consortium database. (B) Gene ontology analysis of AGO-miR-186-5p bound targets from mouse neocortex, using freely available data (10) also finds an enrichment of targets with neuronal relevance. Gene ontology enrichment analysis was performed for reactome and biological process using the Gene Ontology Consortium database. (A and B) Only categories with statistical significance were considered and non-redundant neuroscience-related categories were selected for graphical representation (binomial statistical test with Bonferroni correction for multiple testing:  $p \leq 0.05$ ).

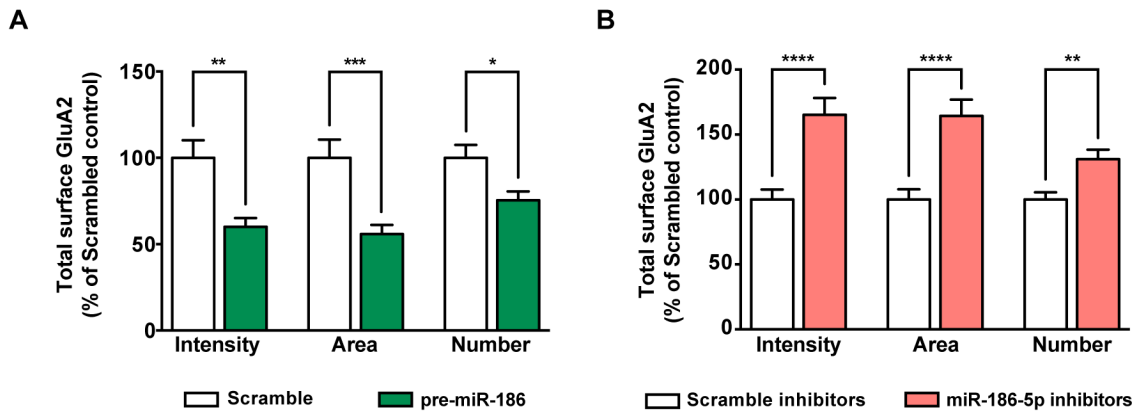

**Fig. S6.** Manipulation of miR-186-5p levels regulates total surface GluA2 expression. (A) Overexpression of pre-miR-186 decreased the intensity, area and number of surface GluA2 clusters in hippocampal neurons, per dendritic length (n=29-32 cells per condition from 3 independent experiments; Mann-Whitney test: \*p≤0.05, \*\*p≤0.01, \*\*\*p≤0.001). (B) Inhibition of miR-186-5p increased the intensity, area and number of surface GluA2 clusters in hippocampal neurons, per dendritic length (n=49 cells from 5 independent experiments; Mann-Whitney test: \*p≤0.05).

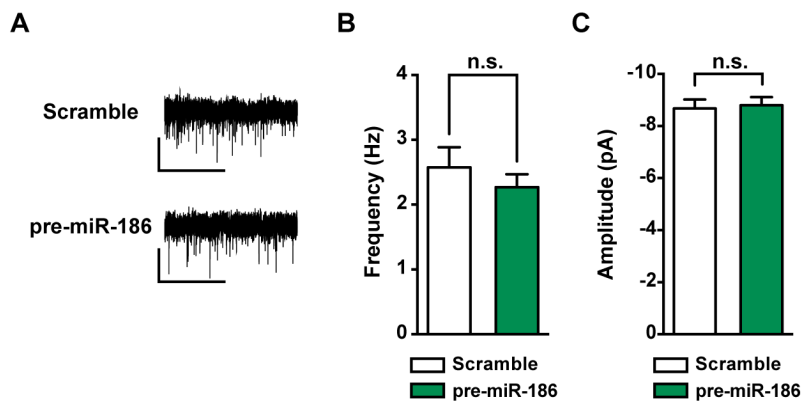

**Fig. S7.** Expression of pre-miR-186 does not affect AMPAR-mediated mEPSCs. (A) Representative whole-cell current traces of AMPAR-mediated mEPSCs from hippocampal neurons expressing a scramble control or pre-miR-186 (scale bars: vertical, 10 pA; horizontal, 5 s). (B-C) AMPAR-mediated mEPSCs frequency (B) and amplitude (C) of neurons expressing pre-miR186 was similar to neurons expressing scramble (n=25-26 neurons per experimental condition from 13 independent preparations; Mann-Whitney test).



**Table S1. Regulated transcripts upon 9h of GYKI-52466 and MK-801 treatment in hippocampal neurons.**

| Synaptic activity blockade 9h |              |                  |             |
|-------------------------------|--------------|------------------|-------------|
| Gene symbol                   | Agilent ID   | Adjusted p value | Fold Change |
| <i>Wisp3</i>                  | A_44_P284915 | 4.826E-02        | 0.074       |
| <i>LOC108352322</i>           | A_64_P076790 | 4.861E-02        | 0.136       |
| <i>Muc5ac</i>                 | A_43_P15221  | 4.889E-02        | 0.137       |
| <i>Was</i>                    | A_44_P497033 | 4.412E-02        | 0.148       |
| <i>Cdkn1c</i>                 | A_64_P165085 | 2.710E-04        | 0.151       |
| <i>Skor2</i>                  | A_64_P045898 | 3.104E-02        | 0.156       |
| <i>Glyat1</i>                 | A_44_P398330 | 2.498E-02        | 0.158       |
| <i>Defb16-ps</i>              | A_64_P159046 | 2.960E-02        | 0.162       |
| <i>LOC302576</i>              | A_44_P407914 | 2.195E-02        | 0.163       |
| <i>Npas4</i>                  | A_64_P064531 | 2.064E-02        | 0.164       |
| <i>LOC100909517</i>           | A_64_P050005 | 3.790E-04        | 0.168       |
| <i>Samt2</i>                  | A_64_P050005 | 3.790E-04        | 0.168       |
| <i>Olr1542</i>                | A_64_P099598 | 3.248E-02        | 0.168       |
| <i>Pth2r</i>                  | A_64_P000201 | 1.519E-02        | 0.172       |
| <i>Olr1696</i>                | A_64_P006778 | 1.902E-02        | 0.175       |
| <i>Rmi2</i>                   | A_64_P056975 | 3.420E-02        | 0.178       |
| <i>Hba-a3</i>                 | A_64_P077200 | 3.139E-02        | 0.183       |
| <i>Tlr5</i>                   | A_64_P003019 | 4.232E-02        | 0.185       |
| <i>Tp63</i>                   | A_43_P15281  | 1.560E-04        | 0.187       |
| <i>Olr735</i>                 | A_64_P031422 | 4.589E-02        | 0.191       |
| <i>Spesp1</i>                 | A_64_P015395 | 4.466E-02        | 0.197       |
| <i>Ccdc183</i>                | A_44_P806349 | 2.171E-02        | 0.197       |
| <i>Rd3l</i>                   | A_64_P004007 | 8.410E-03        | 0.200       |
| <i>Rhox12</i>                 | A_64_P053441 | 7.621E-03        | 0.202       |
| <i>Vom2r30</i>                | A_64_P071624 | 3.339E-02        | 0.203       |
| <i>Ism1</i>                   | A_64_P096096 | 3.910E-04        | 0.204       |
| <i>Nkx2-3</i>                 | A_44_P508632 | 4.850E-04        | 0.206       |
| <i>Aicda</i>                  | A_64_P113478 | 2.295E-02        | 0.213       |
| <i>Tac1</i>                   | A_64_P009996 | 9.010E-04        | 0.215       |
| <i>Rn50_X_0598.1</i>          | A_64_P152219 | 5.043E-03        | 0.217       |
| <i>Olr1331</i>                | A_64_P163434 | 1.124E-02        | 0.217       |
| <i>Cyr61</i>                  | A_64_P075357 | 2.100E-02        | 0.218       |
| <i>Tmem52b</i>                | A_64_P029874 | 3.624E-02        | 0.220       |
| <i>Olr625</i>                 | A_44_P168008 | 2.211E-02        | 0.220       |
| <i>LOC103690541</i>           | A_64_P045246 | 8.160E-04        | 0.223       |

|                       |               |           |       |
|-----------------------|---------------|-----------|-------|
| <i>Rn50_X_0681.1</i>  | A_64_P040019  | 2.325E-03 | 0.224 |
| <i>Olr1409</i>        | A_64_P076967  | 4.300E-02 | 0.225 |
| <i>LOC100910107</i>   | A_44_P358654  | 1.012E-02 | 0.227 |
| <i>Tfec</i>           | A_44_P334922  | 2.058E-02 | 0.228 |
| <i>Sntn</i>           | A_64_P082853  | 1.841E-03 | 0.229 |
| <i>Mlf1</i>           | A_44_P424218  | 3.378E-03 | 0.232 |
| <i>Olr300</i>         | A_64_P140353  | 4.712E-02 | 0.235 |
| <i>Erg</i>            | A_64_P322881  | 5.276E-03 | 0.236 |
| <i>AABR07003241.2</i> | A_44_P278653  | 4.619E-02 | 0.239 |
| <i>LOC687880</i>      | A_44_P278653  | 4.619E-02 | 0.239 |
| <i>Mepe</i>           | A_64_P164198  | 8.260E-04 | 0.239 |
| <i>AABR07025284.1</i> | A_44_P762053  | 8.555E-03 | 0.240 |
| <i>Palld</i>          | A_44_P762053  | 8.555E-03 | 0.240 |
| <i>Inhba</i>          | A_64_P030654  | 9.820E-04 | 0.241 |
| <i>AABR07015320.1</i> | A_64_P120167  | 1.470E-02 | 0.243 |
| <i>Agr3</i>           | A_44_P199392  | 3.865E-02 | 0.247 |
| <i>Plagl1</i>         | A_64_P147225  | 4.641E-03 | 0.247 |
| <i>Clrn1</i>          | A_64_P065235  | 1.980E-04 | 0.249 |
| <i>Tac1</i>           | A_64_P009999  | 3.350E-03 | 0.251 |
| <i>LOC103694398</i>   | A_64_P029592  | 1.390E-02 | 0.251 |
| <i>Ccdc129</i>        | A_64_P156711  | 1.010E-03 | 0.252 |
| <i>Cftr</i>           | A_64_P103537  | 1.315E-03 | 0.253 |
| <i>Adamdec1</i>       | A_64_P063239  | 2.365E-03 | 0.254 |
| <i>Lin28b</i>         | A_64_P103552  | 2.288E-02 | 0.254 |
| <i>Cga</i>            | A_64_P085680  | 1.777E-02 | 0.259 |
| <i>Nr4a2</i>          | A_43_P12023   | 1.780E-04 | 0.261 |
| <i>Fzd6</i>           | A_64_P109373  | 1.620E-04 | 0.262 |
| <i>Perm1</i>          | A_64_P121796  | 6.420E-04 | 0.263 |
| <i>Cldn5</i>          | A_43_P15791   | 1.253E-03 | 0.263 |
| <i>Nup50</i>          | A_64_P096767  | 4.623E-02 | 0.265 |
| <i>Xirp1</i>          | A_44_P142837  | 1.246E-02 | 0.265 |
| <i>Cflar</i>          | A_64_P109603  | 9.160E-04 | 0.268 |
| <i>Lyzl1</i>          | A_64_P018236  | 1.001E-02 | 0.271 |
| <i>Flywch1</i>        | A_64_P126772  | 3.724E-03 | 0.274 |
| <i>Wfdc5</i>          | A_64_P099710  | 3.352E-02 | 0.276 |
| <i>Serpini2</i>       | A_64_P072548  | 5.680E-03 | 0.277 |
| <i>Qrfpr</i>          | A_44_P341895  | 2.541E-02 | 0.277 |
| <i>Cd80</i>           | A_64_P164849  | 1.504E-02 | 0.278 |
| <i>Serpib10</i>       | A_44_P1004757 | 5.077E-03 | 0.281 |
| <i>Olr562</i>         | A_64_P055813  | 8.199E-03 | 0.281 |
| <i>LOC689725</i>      | A_64_P005258  | 2.025E-02 | 0.282 |
| <i>Blnk</i>           | A_44_P144741  | 3.857E-03 | 0.283 |
| <i>Zc3h12d</i>        | A_44_P945723  | 1.043E-02 | 0.284 |
| <i>Calcr</i>          | A_44_P158758  | 1.245E-02 | 0.285 |

|                       |              |           |       |
|-----------------------|--------------|-----------|-------|
| <i>Hoxd12</i>         | A_64_P082093 | 9.350E-03 | 0.285 |
| <i>Nkpd1</i>          | A_64_P098698 | 6.570E-04 | 0.287 |
| <i>Nr4a2</i>          | A_64_P154952 | 3.070E-06 | 0.287 |
| <i>Atp9b</i>          | A_64_P073198 | 1.400E-02 | 0.287 |
| <i>Dydc1</i>          | A_64_P023725 | 1.314E-02 | 0.289 |
| <i>Retn</i>           | A_64_P002546 | 4.399E-02 | 0.290 |
| <i>Trpc6</i>          | A_64_P064621 | 1.094E-03 | 0.290 |
| <i>Arc</i>            | A_44_P118724 | 2.992E-02 | 0.292 |
| <i>Mall</i>           | A_64_P144492 | 5.973E-03 | 0.292 |
| <i>AABR07025387.1</i> | A_64_P061552 | 4.608E-02 | 0.293 |
| <i>Nostrin</i>        | A_44_P166206 | 6.600E-04 | 0.294 |
| <i>Ms4a6c</i>         | A_64_P065422 | 1.744E-02 | 0.295 |
| <i>Insl6</i>          | A_64_P120070 | 4.506E-02 | 0.295 |
| <i>Evi2a</i>          | A_64_P008229 | 1.521E-03 | 0.296 |
| <i>Rn50_X_0645.1</i>  | A_64_P026737 | 1.875E-02 | 0.299 |
| <i>Ddx4</i>           | A_64_P119560 | 4.118E-02 | 0.301 |
| <i>Bdnf</i>           | A_44_P437896 | 1.810E-04 | 0.302 |
| <i>Olr1052</i>        | A_64_P016117 | 1.145E-02 | 0.302 |
| <i>AC103129.1</i>     | A_64_P121673 | 4.415E-02 | 0.303 |
| <i>Rgs2</i>           | A_43_P14131  | 3.460E-04 | 0.303 |
| <i>Casp8</i>          | A_44_P298210 | 4.053E-02 | 0.303 |
| <i>Il22ra2</i>        | A_44_P151482 | 9.158E-03 | 0.304 |
| <i>Pdyn</i>           | A_44_P476915 | 1.190E-04 | 0.304 |
| <i>Prame</i>          | A_64_P107534 | 4.894E-02 | 0.306 |
| <i>Krt28</i>          | A_64_P081100 | 1.559E-02 | 0.307 |
| <i>Mrgprb13</i>       | A_64_P046140 | 3.523E-02 | 0.308 |
| <i>Serpib2</i>        | A_44_P104985 | 7.492E-03 | 0.309 |
| <i>Olr214</i>         | A_44_P325609 | 4.339E-02 | 0.309 |
| <i>Pip</i>            | A_64_P096891 | 1.260E-04 | 0.310 |
| <i>Olr1735</i>        | A_64_P110694 | 4.755E-02 | 0.310 |
| <i>Ubtfl1</i>         | A_44_P135864 | 4.766E-02 | 0.310 |
| <i>Mcc</i>            | A_64_P132511 | 2.550E-02 | 0.311 |
| <i>Smcp</i>           | A_42_P726363 | 4.079E-03 | 0.312 |
| <i>Olr442</i>         | A_64_P075053 | 4.305E-02 | 0.312 |
| <i>Nps</i>            | A_64_P057360 | 1.771E-02 | 0.313 |
| <i>LOC690288</i>      | A_64_P041243 | 3.793E-02 | 0.314 |
| <i>Hpgds</i>          | A_44_P439292 | 4.357E-02 | 0.314 |
| <i>Defb43</i>         | A_64_P058953 | 6.210E-04 | 0.315 |
| <i>Olr346</i>         | A_64_P155991 | 3.982E-02 | 0.315 |
| <i>Olr1592</i>        | A_64_P014677 | 4.344E-02 | 0.315 |
| <i>Kcnj5</i>          | A_64_P134008 | 4.618E-02 | 0.315 |
| <i>Afp</i>            | A_43_P14817  | 5.001E-03 | 0.315 |
| <i>Olr542</i>         | A_64_P055803 | 7.136E-03 | 0.316 |
| <i>Cblc</i>           | A_44_P456923 | 4.718E-02 | 0.316 |

|                     |              |           |       |
|---------------------|--------------|-----------|-------|
| <i>Tcp10b</i>       | A_44_P304432 | 4.762E-02 | 0.317 |
| <i>Vom2r75</i>      | A_44_P102764 | 4.179E-02 | 0.317 |
| <i>Isl1</i>         | A_44_P509917 | 3.883E-02 | 0.318 |
| <i>Olr1200</i>      | A_64_P014028 | 1.070E-02 | 0.318 |
| <i>Defb28</i>       | A_64_P042611 | 4.408E-02 | 0.318 |
| <i>Mepe</i>         | A_64_P027449 | 1.444E-03 | 0.318 |
| <i>Olr1147</i>      | A_64_P112786 | 4.863E-02 | 0.319 |
| <i>Olr595</i>       | A_64_P136452 | 4.645E-02 | 0.319 |
| <i>Olr67</i>        | A_64_P027413 | 4.781E-02 | 0.319 |
| <i>Olr839</i>       | A_64_P005371 | 3.415E-02 | 0.319 |
| <i>Olr541</i>       | A_64_P137862 | 9.113E-03 | 0.320 |
| <i>Olr413</i>       | A_64_P080791 | 3.783E-02 | 0.320 |
| <i>Olr790</i>       | A_44_P367564 | 3.867E-02 | 0.320 |
| <i>Vom2r71</i>      | A_64_P378583 | 4.497E-02 | 0.322 |
| <i>RGD1306519</i>   | A_44_P520496 | 4.214E-02 | 0.322 |
| <i>Nlrp10</i>       | A_64_P103419 | 3.569E-02 | 0.322 |
| <i>Olr1873</i>      | A_64_P012086 | 4.416E-02 | 0.322 |
| <i>Ffar1</i>        | A_64_P016514 | 4.086E-02 | 0.323 |
| <i>RGD1564319</i>   | A_64_P053421 | 3.950E-02 | 0.324 |
| <i>Apon</i>         | A_44_P321532 | 4.345E-02 | 0.324 |
| <i>Olr1242</i>      | A_64_P099593 | 4.652E-02 | 0.325 |
| <i>Cdkn1c</i>       | A_44_P374618 | 8.611E-03 | 0.325 |
| <i>LOC100912540</i> | A_64_P120729 | 3.984E-02 | 0.326 |
| <i>Olr499</i>       | A_64_P120729 | 3.984E-02 | 0.326 |
| <i>Fam71d</i>       | A_44_P636269 | 6.680E-03 | 0.326 |
| <i>Cfap206</i>      | A_64_P013842 | 3.249E-02 | 0.327 |
| <i>Igf2bp1</i>      | A_44_P550215 | 4.143E-02 | 0.327 |
| <i>Mug1</i>         | A_64_P038877 | 3.985E-02 | 0.327 |
| <i>Wisp3</i>        | A_64_P031735 | 3.870E-02 | 0.327 |
| <i>Olr867</i>       | A_64_P045042 | 4.203E-02 | 0.328 |
| <i>Tigd4</i>        | A_64_P159977 | 4.881E-02 | 0.328 |
| <i>Defb14</i>       | A_64_P105226 | 4.284E-02 | 0.328 |
| <i>LOC100365525</i> | A_64_P190466 | 4.163E-02 | 0.329 |
| <i>Fam209a</i>      | A_44_P448030 | 8.698E-03 | 0.329 |
| <i>RGD1564172</i>   | A_44_P431483 | 3.076E-02 | 0.329 |
| <i>Olr43</i>        | A_64_P091558 | 4.566E-02 | 0.329 |
| <i>Olr319</i>       | A_64_P127307 | 4.425E-02 | 0.330 |
| <i>Olr1072</i>      | A_64_P079997 | 3.139E-02 | 0.331 |
| <i>Gcsam</i>        | A_64_P002036 | 4.924E-02 | 0.331 |
| <i>Cd3e</i>         | A_44_P103225 | 4.012E-02 | 0.331 |
| <i>Penk</i>         | A_42_P749184 | 2.443E-03 | 0.332 |
| <i>Olr1432</i>      | A_64_P018351 | 3.567E-02 | 0.332 |
| <i>Pik3cg</i>       | A_44_P375490 | 4.654E-02 | 0.333 |
| <i>Olr1671</i>      | A_64_P161958 | 3.522E-02 | 0.333 |

|                       |               |           |       |
|-----------------------|---------------|-----------|-------|
| <i>Olr11</i>          | A_64_P020031  | 4.426E-02 | 0.333 |
| <i>Hhipl2</i>         | A_44_P196679  | 4.781E-02 | 0.333 |
| <i>Olr57</i>          | A_64_P072623  | 4.449E-02 | 0.333 |
| <i>Olr1376</i>        | A_44_P271569  | 3.323E-02 | 0.333 |
| <i>AABR07002351.1</i> | A_44_P168372  | 3.298E-02 | 0.333 |
| <i>Pla2g2a</i>        | A_44_P247081  | 4.318E-02 | 0.334 |
| <i>Spag6</i>          | A_64_P121932  | 2.129E-02 | 0.334 |
| <i>Defb49</i>         | A_64_P026815  | 3.366E-02 | 0.334 |
| <i>Olr1339</i>        | A_44_P344253  | 3.417E-02 | 0.334 |
| <i>Olr441</i>         | A_64_P019936  | 3.793E-02 | 0.334 |
| <i>Retnla</i>         | A_43_P12772   | 2.961E-02 | 0.334 |
| <i>Sprr1a</i>         | A_64_P092891  | 2.523E-03 | 0.335 |
| <i>Ckm</i>            | A_64_P155925  | 7.050E-04 | 0.335 |
| <i>Ppp4r3c</i>        | A_44_P541470  | 4.799E-02 | 0.335 |
| <i>Olr1305</i>        | A_44_P512896  | 4.473E-02 | 0.335 |
| <i>RGD1560775</i>     | A_44_P785821  | 3.725E-02 | 0.336 |
| <i>Pramel6</i>        | A_64_P048466  | 3.070E-02 | 0.336 |
| <i>Rag1</i>           | A_64_P116695  | 4.752E-02 | 0.336 |
| <i>LOC100911562</i>   | A_44_P443500  | 1.083E-02 | 0.336 |
| <i>RGD1309808</i>     | A_44_P443500  | 1.083E-02 | 0.336 |
| <i>Olr865</i>         | A_64_P006853  | 3.612E-02 | 0.336 |
| <i>Ccr2</i>           | A_64_P100793  | 3.081E-02 | 0.336 |
| <i>Anxa10</i>         | A_44_P265003  | 1.353E-03 | 0.337 |
| <i>Rn50_7_1414.6</i>  | A_64_P089802  | 4.423E-02 | 0.337 |
| <i>LOC691970</i>      | A_64_P345426  | 3.336E-02 | 0.337 |
| <i>Krt80</i>          | A_64_P120808  | 1.411E-02 | 0.338 |
| <i>Nox1</i>           | A_64_P091732  | 2.061E-03 | 0.339 |
| <i>Olr347</i>         | A_64_P080796  | 3.823E-02 | 0.339 |
| <i>Olr235</i>         | A_64_P046135  | 4.433E-02 | 0.339 |
| <i>Thbd</i>           | A_64_P033610  | 3.102E-02 | 0.339 |
| <i>Got1l1</i>         | A_44_P1043668 | 2.338E-02 | 0.340 |
| <i>Rn50_X_0694.2</i>  | A_44_P494687  | 4.075E-02 | 0.340 |
| <i>RT1-M10-2-ps</i>   | A_64_P085526  | 3.895E-02 | 0.340 |
| <i>Naglt1</i>         | A_64_P159912  | 4.023E-02 | 0.341 |
| <i>Gimap4</i>         | A_44_P506043  | 3.524E-02 | 0.341 |
| <i>Olr477</i>         | A_64_P016941  | 4.180E-02 | 0.341 |
| <i>AABR07070456.1</i> | A_64_P162125  | 3.879E-02 | 0.341 |
| <i>Oog3</i>           | A_64_P146949  | 4.411E-02 | 0.342 |
| <i>Olr69</i>          | A_64_P053516  | 2.376E-02 | 0.342 |
| <i>LOC364228</i>      | A_44_P358693  | 1.435E-02 | 0.343 |
| <i>Ckmt2</i>          | A_42_P615837  | 1.063E-02 | 0.344 |
| <i>Ms4a1</i>          | A_44_P344612  | 3.628E-02 | 0.344 |
| <i>Olr454</i>         | A_64_P072763  | 2.646E-02 | 0.344 |
| <i>Olr927</i>         | A_64_P154720  | 3.416E-02 | 0.344 |

|                       |              |           |       |
|-----------------------|--------------|-----------|-------|
| <i>Fam155b</i>        | A_64_P155501 | 1.125E-02 | 0.345 |
| <i>P2ry10</i>         | A_44_P380132 | 3.156E-02 | 0.345 |
| <i>Alpl</i>           | A_43_P11684  | 6.268E-03 | 0.346 |
| <i>Spink3</i>         | A_44_P313452 | 3.308E-02 | 0.346 |
| <i>Olr818</i>         | A_64_P068438 | 3.190E-02 | 0.346 |
| <i>LOC500007</i>      | A_64_P060409 | 2.088E-03 | 0.347 |
| <i>Cdcp1</i>          | A_44_P790155 | 3.061E-02 | 0.347 |
| <i>Chrdl1</i>         | A_44_P278408 | 4.760E-04 | 0.347 |
| <i>Olr148</i>         | A_64_P139893 | 2.431E-02 | 0.347 |
| <i>Erg</i>            | A_64_P095972 | 5.110E-04 | 0.348 |
| <i>AY172581.2</i>     | A_64_P123361 | 4.408E-02 | 0.348 |
| <i>AY172581.20</i>    | A_64_P123361 | 4.408E-02 | 0.348 |
| <i>Mt-nd6</i>         | A_64_P123361 | 4.408E-02 | 0.348 |
| <i>Ccdc73</i>         | A_64_P009624 | 2.819E-02 | 0.348 |
| <i>AABR07052762.1</i> | A_64_P107938 | 3.020E-02 | 0.348 |
| <i>Rn50_20_0009.6</i> | A_64_P069284 | 2.698E-02 | 0.349 |
| <i>LOC500846</i>      | A_64_P000762 | 7.914E-03 | 0.349 |
| <i>Olr135</i>         | A_64_P046437 | 2.823E-02 | 0.349 |
| <i>Tesl</i>           | A_44_P365969 | 3.863E-02 | 0.350 |
| <i>Epx</i>            | A_44_P375647 | 3.164E-02 | 0.350 |
| <i>LOC690142</i>      | A_64_P027233 | 3.725E-02 | 0.350 |
| <i>LOC688970</i>      | A_44_P224977 | 3.426E-02 | 0.350 |
| <i>Olr526</i>         | A_64_P054296 | 3.270E-02 | 0.351 |
| <i>Cflar</i>          | A_64_P109610 | 3.030E-04 | 0.351 |
| <i>Olr164</i>         | A_64_P130124 | 3.270E-02 | 0.352 |
| <i>AABR07025272.1</i> | A_64_P158345 | 3.293E-03 | 0.352 |
| <i>Olr537</i>         | A_64_P137100 | 3.398E-02 | 0.352 |
| <i>Olr250</i>         | A_64_P004062 | 3.755E-02 | 0.353 |
| <i>RGD1564981</i>     | A_44_P138098 | 1.940E-03 | 0.353 |
| <i>Ptgs2</i>          | A_64_P129316 | 9.917E-03 | 0.353 |
| <i>Krt82</i>          | A_64_P120827 | 2.433E-02 | 0.353 |
| <i>Rnase11</i>        | A_64_P039616 | 2.602E-02 | 0.354 |
| <i>Klrk1</i>          | A_64_P121826 | 3.754E-02 | 0.354 |
| <i>Pramef12</i>       | A_64_P091213 | 1.887E-02 | 0.355 |
| <i>Fcrlb</i>          | A_64_P105422 | 2.416E-02 | 0.355 |
| <i>Olr729</i>         | A_64_P032370 | 3.201E-02 | 0.355 |
| <i>Tcf7l2</i>         | A_64_P040190 | 2.518E-03 | 0.355 |
| <i>Eomes</i>          | A_64_P022461 | 1.837E-02 | 0.355 |
| <i>Dhrs9</i>          | A_64_P016347 | 1.728E-02 | 0.355 |
| <i>Olr231</i>         | A_64_P028973 | 2.313E-02 | 0.355 |
| <i>Olr648</i>         | A_64_P033385 | 3.542E-02 | 0.356 |
| <i>Cysltr1</i>        | A_64_P057325 | 2.318E-02 | 0.356 |
| <i>Serpib8</i>        | A_64_P084891 | 2.604E-02 | 0.357 |
| <i>Olr853</i>         | A_64_P058794 | 2.145E-02 | 0.357 |

|                        |               |           |       |
|------------------------|---------------|-----------|-------|
| <i>Olr78</i>           | A_64_P082062  | 2.172E-02 | 0.357 |
| <i>Ssx1</i>            | A_64_P001294  | 2.301E-02 | 0.357 |
| <i>LOC680955</i>       | A_64_P152035  | 1.996E-02 | 0.358 |
| <i>Ccdc188</i>         | A_64_P102578  | 2.321E-02 | 0.358 |
| <i>AABR07042633.1</i>  | A_64_P070751  | 2.187E-02 | 0.358 |
| <i>AABR07058745.1</i>  | A_44_P1018696 | 2.858E-02 | 0.359 |
| <i>AC096792.1</i>      | A_44_P1018696 | 2.858E-02 | 0.359 |
| <i>Lax1</i>            | A_42_P714166  | 2.724E-02 | 0.359 |
| <i>Il31ra</i>          | A_64_P009260  | 4.276E-02 | 0.360 |
| <i>Vom2r1</i>          | A_64_P232286  | 1.500E-02 | 0.360 |
| <i>Vom2r3</i>          | A_64_P232286  | 1.500E-02 | 0.360 |
| <i>Vom1r96</i>         | A_64_P094352  | 2.630E-02 | 0.360 |
| <i>Olr111</i>          | A_64_P047897  | 2.137E-02 | 0.361 |
| <i>LOC100366054</i>    | A_64_P056743  | 3.271E-03 | 0.361 |
| <i>Dkk1</i>            | A_64_P049953  | 3.058E-02 | 0.361 |
| <i>NEWGENE_1307313</i> | A_64_P049953  | 3.058E-02 | 0.361 |
| <i>Rn50_X_0586.1</i>   | A_64_P135597  | 2.477E-02 | 0.361 |
| <i>AABR07038981.1</i>  | A_64_P108192  | 2.277E-02 | 0.362 |
| <i>Sun3</i>            | A_64_P004526  | 1.975E-02 | 0.362 |
| <i>Ovch2</i>           | A_64_P007123  | 4.265E-03 | 0.363 |
| <i>LOC100910977</i>    | A_64_P015153  | 2.042E-02 | 0.363 |
| <i>Padi6</i>           | A_64_P153566  | 2.169E-02 | 0.363 |
| <i>Crh</i>             | A_64_P116972  | 2.865E-03 | 0.364 |
| <i>LOC100909620</i>    | A_44_P243330  | 2.928E-02 | 0.364 |
| <i>LOC102553892</i>    | A_44_P243330  | 2.928E-02 | 0.364 |
| <i>RGD1564380</i>      | A_44_P243330  | 2.928E-02 | 0.364 |
| <i>Shox2</i>           | A_44_P418245  | 1.777E-02 | 0.365 |
| <i>LOC691670</i>       | A_64_P079474  | 2.002E-02 | 0.365 |
| <i>Fcar</i>            | A_64_P077323  | 1.598E-02 | 0.366 |
| <i>Olr722</i>          | A_64_P017841  | 2.445E-02 | 0.366 |
| <i>Olr1328</i>         | A_64_P120245  | 2.496E-02 | 0.366 |
| <i>Sox7</i>            | A_44_P592221  | 7.400E-04 | 0.366 |
| <i>Olr411</i>          | A_64_P156985  | 9.279E-03 | 0.367 |
| <i>Rspo4</i>           | A_64_P067315  | 2.487E-02 | 0.367 |
| <i>Lilrb4</i>          | A_64_P041711  | 2.462E-02 | 0.367 |
| <i>Tsga13</i>          | A_64_P080139  | 2.588E-03 | 0.367 |
| <i>Lrrc18</i>          | A_44_P199086  | 1.886E-02 | 0.367 |
| <i>Olr783</i>          | A_64_P100629  | 1.742E-02 | 0.367 |
| <i>CstII1</i>          | A_44_P1035294 | 1.618E-02 | 0.367 |
| <i>RGD1561729</i>      | A_44_P480986  | 2.769E-02 | 0.368 |
| <i>Tbc1d21</i>         | A_42_P617310  | 2.150E-02 | 0.368 |
| <i>Olr1142</i>         | A_64_P123298  | 1.890E-02 | 0.368 |
| <i>Kif2b</i>           | A_44_P408173  | 2.728E-02 | 0.368 |
| <i>Tcl1a</i>           | A_64_P008919  | 1.495E-02 | 0.369 |

|                     |              |           |       |
|---------------------|--------------|-----------|-------|
| <i>Ppp3r2</i>       | A_42_P626467 | 1.919E-02 | 0.369 |
| <i>Alox5</i>        | A_44_P105034 | 2.064E-02 | 0.369 |
| <i>Olr396</i>       | A_64_P156001 | 2.175E-02 | 0.369 |
| <i>Slc2a2</i>       | A_64_P011959 | 4.031E-03 | 0.369 |
| <i>Inhbe</i>        | A_44_P471541 | 1.789E-02 | 0.370 |
| <i>Ccdc172</i>      | A_64_P011969 | 3.190E-02 | 0.370 |
| <i>Ncmap</i>        | A_42_P833194 | 4.154E-03 | 0.370 |
| <i>Vom1r19</i>      | A_64_P046071 | 1.446E-02 | 0.370 |
| <i>LOC100909940</i> | A_64_P151343 | 2.533E-02 | 0.370 |
| <i>Olr495</i>       | A_64_P151343 | 2.533E-02 | 0.370 |
| <i>LOC100912917</i> | A_64_P018393 | 7.851E-03 | 0.370 |
| <i>lqcf3</i>        | A_64_P139888 | 2.055E-02 | 0.370 |
| <i>Cldn1</i>        | A_42_P669779 | 1.581E-02 | 0.370 |
| <i>Olr1344</i>      | A_44_P470595 | 2.008E-02 | 0.370 |
| <i>Olr251</i>       | A_64_P028988 | 2.610E-02 | 0.371 |
| <i>Vom2r22</i>      | A_64_P045907 | 2.893E-02 | 0.371 |
| <i>Vom2r25</i>      | A_64_P045907 | 2.893E-02 | 0.371 |
| <i>Sell</i>         | A_44_P135183 | 2.278E-02 | 0.372 |
| <i>Olr343</i>       | A_64_P065472 | 4.349E-02 | 0.372 |
| <i>Rgs4</i>         | A_42_P743580 | 7.150E-04 | 0.372 |
| <i>Tmco5b</i>       | A_44_P974646 | 1.533E-02 | 0.372 |
| <i>Olr1192</i>      | A_64_P014657 | 1.436E-02 | 0.372 |
| <i>Olr340</i>       | A_44_P160967 | 1.929E-02 | 0.372 |
| <i>P2rx7</i>        | A_44_P188222 | 4.349E-02 | 0.372 |
| <i>Asz1</i>         | A_44_P395642 | 3.360E-02 | 0.372 |
| <i>Zfp804b</i>      | A_64_P121402 | 1.203E-02 | 0.373 |
| <i>Olr112</i>       | A_64_P132189 | 1.439E-02 | 0.373 |
| <i>Mettl15</i>      | A_64_P094060 | 1.589E-02 | 0.373 |
| <i>Gimap7</i>       | A_64_P074589 | 1.612E-02 | 0.373 |
| <i>Gnrhr</i>        | A_64_P038312 | 1.899E-02 | 0.373 |
| <i>Atoh7</i>        | A_64_P096743 | 1.461E-02 | 0.374 |
| <i>Lilrb3a</i>      | A_64_P111058 | 1.560E-02 | 0.374 |
| <i>Olr377</i>       | A_64_P009162 | 1.542E-02 | 0.374 |
| <i>Olr51</i>        | A_64_P072593 | 1.741E-02 | 0.375 |
| <i>RGD1566184</i>   | A_44_P166302 | 2.206E-02 | 0.375 |
| <i>Il18rap</i>      | A_64_P158955 | 1.257E-02 | 0.375 |
| <i>Mgat4e</i>       | A_44_P248121 | 1.598E-02 | 0.376 |
| <i>LOC100910698</i> | A_64_P014587 | 1.568E-02 | 0.377 |
| <i>Pramel</i>       | A_64_P014587 | 1.568E-02 | 0.377 |
| <i>Sept10</i>       | A_64_P141090 | 7.610E-04 | 0.377 |
| <i>Obp2b</i>        | A_44_P545520 | 2.402E-02 | 0.377 |
| <i>Adcyap1</i>      | A_44_P522701 | 6.714E-03 | 0.377 |
| <i>Pramel3</i>      | A_64_P159503 | 1.421E-02 | 0.378 |
| <i>Olr1600</i>      | A_64_P011724 | 2.230E-02 | 0.378 |



|                       |               |           |       |
|-----------------------|---------------|-----------|-------|
| <i>Olr358</i>         | A_64_P090339  | 1.282E-02 | 0.378 |
| <i>Txndc8</i>         | A_43_P22466   | 2.113E-02 | 0.379 |
| <i>Tex13b</i>         | A_64_P018977  | 1.290E-02 | 0.379 |
| <i>Olr45</i>          | A_64_P091568  | 1.590E-02 | 0.379 |
| <i>lfng</i>           | A_43_P13320   | 1.349E-03 | 0.380 |
| <i>Olr8</i>           | A_64_P009218  | 1.491E-02 | 0.380 |
| <i>RGD1563352</i>     | A_64_P012438  | 8.056E-03 | 0.380 |
| <i>LOC102555328</i>   | A_64_P081591  | 1.346E-02 | 0.380 |
| <i>LOC686660</i>      | A_64_P151086  | 1.236E-02 | 0.380 |
| <i>LOC100911380</i>   | A_64_P146401  | 8.509E-03 | 0.381 |
| <i>Olr598</i>         | A_64_P146401  | 8.509E-03 | 0.381 |
| <i>Olr131</i>         | A_64_P002799  | 1.990E-02 | 0.381 |
| <i>Ankrd22</i>        | A_44_P170874  | 1.465E-02 | 0.381 |
| <i>Olr1055</i>        | A_64_P108474  | 1.039E-02 | 0.382 |
| <i>Olr1587</i>        | A_64_P123884  | 1.044E-02 | 0.382 |
| <i>Prp2</i>           | A_64_P090508  | 4.789E-02 | 0.382 |
| <i>Mkx</i>            | A_64_P037050  | 1.556E-02 | 0.383 |
| <i>Clca1</i>          | A_43_P16403   | 1.283E-02 | 0.383 |
| <i>AABR07000137.1</i> | A_64_P394356  | 1.734E-02 | 0.384 |
| <i>LOC679782</i>      | A_64_P394356  | 1.734E-02 | 0.384 |
| <i>Terb2</i>          | A_64_P080682  | 6.237E-03 | 0.384 |
| <i>Olr459</i>         | A_64_P154064  | 1.370E-02 | 0.384 |
| <i>Skint4</i>         | A_64_P012689  | 1.976E-02 | 0.384 |
| <i>Rnf17</i>          | A_44_P337667  | 1.153E-02 | 0.385 |
| <i>Aox3</i>           | A_64_P053666  | 1.107E-02 | 0.385 |
| <i>RGD1563714</i>     | A_64_P101727  | 3.472E-02 | 0.385 |
| <i>Gzmn</i>           | A_64_P131355  | 1.275E-02 | 0.385 |
| <i>LOC100911107</i>   | A_44_P489891  | 1.747E-02 | 0.386 |
| <i>Ctsm</i>           | A_64_P000055  | 1.297E-02 | 0.386 |
| <i>Olr758</i>         | A_64_P014242  | 1.620E-02 | 0.386 |
| <i>Asb17</i>          | A_44_P426299  | 1.909E-02 | 0.386 |
| <i>Frem3</i>          | A_44_P433818  | 4.280E-04 | 0.387 |
| <i>Arhgap39</i>       | A_64_P069404  | 2.112E-02 | 0.387 |
| <i>Olr1751</i>        | A_64_P042337  | 1.322E-02 | 0.387 |
| <i>Olr1697</i>        | A_64_P027967  | 1.106E-02 | 0.388 |
| <i>Egr4</i>           | A_42_P708068  | 1.735E-03 | 0.388 |
| <i>Raet1l</i>         | A_64_P019292  | 9.208E-03 | 0.388 |
| <i>Siglech</i>        | A_44_P485051  | 1.445E-02 | 0.388 |
| <i>Olr1059</i>        | A_64_P100709  | 1.792E-02 | 0.389 |
| <i>Hspa1b</i>         | A_44_P1042876 | 3.763E-02 | 0.389 |
| <i>Adora3</i>         | A_64_P005162  | 1.867E-02 | 0.389 |
| <i>LOC100911796</i>   | A_64_P005162  | 1.867E-02 | 0.389 |
| <i>Cldn8</i>          | A_64_P076322  | 9.514E-03 | 0.390 |
| <i>Prss29</i>         | A_44_P434098  | 6.552E-03 | 0.390 |

|                       |              |           |       |
|-----------------------|--------------|-----------|-------|
| <i>Gngt1</i>          | A_64_P058532 | 1.355E-02 | 0.390 |
| <i>Olr176</i>         | A_64_P061146 | 2.315E-02 | 0.390 |
| <i>RGD1560110</i>     | A_44_P560485 | 1.063E-02 | 0.391 |
| <i>RGD1559891</i>     | A_44_P522811 | 3.028E-02 | 0.391 |
| <i>Rnf186</i>         | A_64_P151428 | 1.212E-02 | 0.391 |
| <i>Olr70</i>          | A_64_P082027 | 1.039E-02 | 0.391 |
| <i>Hist1h4m</i>       | A_42_P754654 | 5.469E-03 | 0.391 |
| <i>Man1a1</i>         | A_64_P138041 | 3.130E-04 | 0.391 |
| <i>Cer1</i>           | A_64_P044051 | 1.547E-02 | 0.392 |
| <i>RGD1561231</i>     | A_64_P054495 | 1.556E-02 | 0.392 |
| <i>Prss50</i>         | A_64_P055958 | 1.121E-02 | 0.393 |
| <i>Olr1146</i>        | A_44_P154656 | 1.332E-02 | 0.393 |
| <i>Anks1b</i>         | A_64_P287755 | 2.030E-04 | 0.393 |
| <i>Rxfp2</i>          | A_44_P154138 | 5.010E-03 | 0.393 |
| <i>RGD1564933</i>     | A_64_P083999 | 1.530E-02 | 0.394 |
| <i>Lrit3</i>          | A_64_P019101 | 1.617E-02 | 0.394 |
| <i>Zscan4f</i>        | A_64_P037313 | 2.783E-03 | 0.394 |
| <i>Mat1a</i>          | A_64_P046248 | 6.009E-03 | 0.394 |
| <i>Ear1</i>           | A_44_P187120 | 7.836E-03 | 0.395 |
| <i>LOC103690297</i>   | A_64_P029422 | 8.515E-03 | 0.395 |
| <i>Olr1657</i>        | A_64_P029422 | 8.515E-03 | 0.395 |
| <i>Arpp21</i>         | A_64_P047168 | 2.085E-02 | 0.395 |
| <i>Oacyl</i>          | A_64_P132721 | 7.206E-03 | 0.395 |
| <i>Olr392</i>         | A_44_P266867 | 1.948E-02 | 0.395 |
| <i>AABR07041949.1</i> | A_64_P071257 | 1.174E-03 | 0.395 |
| <i>Ctla4</i>          | A_64_P149949 | 7.342E-03 | 0.395 |
| <i>RGD1309291</i>     | A_64_P056643 | 1.783E-02 | 0.396 |
| <i>Cd300e</i>         | A_64_P019372 | 6.097E-03 | 0.396 |
| <i>Pkhd111</i>        | A_64_P062869 | 1.476E-02 | 0.396 |
| <i>Slc28a3</i>        | A_64_P012749 | 7.859E-03 | 0.397 |
| <i>Olr352</i>         | A_64_P013273 | 1.304E-02 | 0.397 |
| <i>Olr677</i>         | A_64_P118097 | 8.391E-03 | 0.397 |
| <i>Olr1334</i>        | A_64_P044538 | 4.493E-03 | 0.397 |
| <i>H1fnt</i>          | A_44_P810267 | 8.332E-03 | 0.397 |
| <i>Rgs2</i>           | A_64_P002156 | 3.180E-03 | 0.398 |
| <i>Cd200r1</i>        | A_43_P15565  | 1.016E-02 | 0.398 |
| <i>Atp8b4</i>         | A_64_P127893 | 1.084E-02 | 0.398 |
| <i>Hist1h2ao</i>      | A_64_P034635 | 2.185E-03 | 0.398 |
| <i>Hist1h3a</i>       | A_64_P034635 | 2.185E-03 | 0.398 |
| <i>Aicda</i>          | A_64_P113483 | 1.117E-02 | 0.399 |
| <i>Olr1629</i>        | A_64_P020203 | 8.426E-03 | 0.399 |
| <i>Pr14a1</i>         | A_44_P461456 | 3.085E-02 | 0.399 |
| <i>LOC100910010</i>   | A_64_P109197 | 8.640E-03 | 0.399 |
| <i>LOC100910041</i>   | A_64_P109197 | 8.640E-03 | 0.399 |

|                     |              |           |       |
|---------------------|--------------|-----------|-------|
| <i>LOC100910256</i> | A_64_P109197 | 8.640E-03 | 0.399 |
| <i>LOC100910439</i> | A_64_P109197 | 8.640E-03 | 0.399 |
| <i>LOC100910445</i> | A_64_P109197 | 8.640E-03 | 0.399 |
| <i>Olr1275</i>      | A_64_P109197 | 8.640E-03 | 0.399 |
| <i>Mcm10</i>        | A_44_P262720 | 9.273E-03 | 0.400 |
| <i>Vom2r38</i>      | A_64_P094696 | 8.408E-03 | 0.400 |
| <i>Abca15</i>       | A_64_P126513 | 4.926E-02 | 0.400 |
| <i>Dntt</i>         | A_64_P047983 | 7.821E-03 | 0.401 |
| <i>Olr36</i>        | A_44_P538456 | 9.331E-03 | 0.401 |
| <i>AC097901.1</i>   | A_44_P344187 | 7.189E-03 | 0.402 |
| <i>Olr1424</i>      | A_44_P344187 | 7.189E-03 | 0.402 |
| <i>Scgb1b24</i>     | A_64_P053564 | 1.192E-02 | 0.402 |
| <i>LOC100912565</i> | A_44_P387145 | 1.282E-02 | 0.402 |
| <i>Olr716</i>       | A_64_P016419 | 3.308E-02 | 0.402 |
| <i>Aoc1</i>         | A_42_P592385 | 8.143E-03 | 0.402 |
| <i>Defb11</i>       | A_64_P023894 | 5.212E-03 | 0.403 |
| <i>Tarm1</i>        | A_64_P000059 | 7.786E-03 | 0.403 |
| <i>Catsper4</i>     | A_64_P122536 | 4.429E-02 | 0.404 |
| <i>Scgb2b24</i>     | A_64_P133672 | 7.655E-03 | 0.404 |
| <i>LOC501038</i>    | A_64_P125656 | 7.183E-03 | 0.404 |
| <i>Aoah</i>         | A_64_P127848 | 6.717E-03 | 0.404 |
| <i>Olr602</i>       | A_64_P036895 | 2.689E-02 | 0.404 |
| <i>LOC688828</i>    | A_64_P090458 | 3.853E-03 | 0.404 |
| <i>Uap1</i>         | A_64_P055323 | 5.915E-03 | 0.405 |
| <i>Olr877</i>       | A_44_P205638 | 7.203E-03 | 0.405 |
| <i>Pdcd1lg2</i>     | A_64_P128032 | 8.200E-03 | 0.406 |
| <i>Lilra5</i>       | A_64_P145571 | 1.019E-02 | 0.407 |
| <i>Pax1</i>         | A_44_P839270 | 7.300E-05 | 0.407 |
| <i>Lrcol1</i>       | A_64_P005780 | 6.426E-03 | 0.407 |
| <i>Cd36</i>         | A_64_P054808 | 1.965E-03 | 0.407 |
| <i>Ccdc38</i>       | A_44_P693350 | 6.969E-03 | 0.407 |
| <i>Trim24</i>       | A_64_P152306 | 8.396E-03 | 0.407 |
| <i>Defb26</i>       | A_64_P101504 | 3.544E-03 | 0.408 |
| <i>Cst9l</i>        | A_43_P22892  | 1.660E-02 | 0.408 |
| <i>Dpccr1</i>       | A_44_P414379 | 1.067E-02 | 0.409 |
| <i>Pou6f2</i>       | A_64_P023744 | 4.576E-02 | 0.409 |
| <i>RGD1305184</i>   | A_64_P105730 | 8.490E-03 | 0.409 |
| <i>Esrrg</i>        | A_44_P393299 | 2.042E-02 | 0.409 |
| <i>Tinag</i>        | A_42_P512860 | 9.090E-04 | 0.409 |
| <i>Ddx43</i>        | A_64_P032375 | 9.249E-03 | 0.410 |
| <i>Poteg</i>        | A_64_P139644 | 6.362E-03 | 0.410 |
| <i>Uox</i>          | A_44_P392482 | 1.905E-03 | 0.410 |
| <i>Rassf8</i>       | A_44_P475940 | 3.235E-02 | 0.410 |
| <i>LOC100912524</i> | A_64_P002829 | 3.770E-02 | 0.411 |

|                       |              |           |       |
|-----------------------|--------------|-----------|-------|
| <i>Olr1718</i>        | A_64_P036168 | 3.262E-03 | 0.411 |
| <i>Sypl2</i>          | A_43_P15024  | 2.302E-02 | 0.411 |
| <i>Map3k5</i>         | A_44_P229289 | 8.660E-05 | 0.411 |
| <i>Dsg2</i>           | A_64_P092394 | 3.272E-02 | 0.412 |
| <i>Defa8</i>          | A_64_P131573 | 2.037E-02 | 0.412 |
| <i>LOC102551575</i>   | A_44_P417206 | 4.059E-03 | 0.412 |
| <i>Ly49si1</i>        | A_64_P037515 | 5.549E-03 | 0.412 |
| <i>Olr1767</i>        | A_64_P113560 | 5.404E-03 | 0.412 |
| <i>Cacna2d4</i>       | A_44_P461917 | 1.034E-02 | 0.412 |
| <i>Svs1</i>           | A_64_P097884 | 1.529E-02 | 0.412 |
| <i>Psbpc2</i>         | A_43_P15656  | 9.675E-03 | 0.412 |
| <i>Evc2</i>           | A_64_P139408 | 2.642E-02 | 0.413 |
| <i>Nox4</i>           | A_44_P154040 | 3.305E-03 | 0.413 |
| <i>Mogat3</i>         | A_64_P014642 | 1.058E-02 | 0.413 |
| <i>Fos</i>            | A_64_P131051 | 2.545E-03 | 0.414 |
| <i>Ripply1</i>        | A_64_P024720 | 2.104E-03 | 0.414 |
| <i>Epha1</i>          | A_64_P049128 | 9.222E-03 | 0.414 |
| <i>Tns2</i>           | A_64_P030474 | 1.936E-02 | 0.414 |
| <i>Myct1</i>          | A_64_P010318 | 1.610E-02 | 0.414 |
| <i>Itih4</i>          | A_64_P044776 | 5.490E-04 | 0.414 |
| <i>Slc2a10</i>        | A_64_P084128 | 3.661E-02 | 0.414 |
| <i>Nkx2-4</i>         | A_64_P012793 | 2.125E-02 | 0.415 |
| <i>LOC689766</i>      | A_64_P072455 | 3.400E-03 | 0.415 |
| <i>Saxo1</i>          | A_44_P227367 | 8.538E-03 | 0.416 |
| <i>Klk7</i>           | A_64_P091254 | 8.410E-03 | 0.416 |
| <i>Slco1a1</i>        | A_43_P15534  | 8.190E-03 | 0.416 |
| <i>Gpr65</i>          | A_43_P19712  | 2.808E-02 | 0.416 |
| <i>Olr1326</i>        | A_64_P093912 | 4.794E-03 | 0.416 |
| <i>Fam167b</i>        | A_64_P035962 | 4.984E-02 | 0.416 |
| <i>Olr436</i>         | A_64_P073495 | 4.732E-03 | 0.416 |
| <i>RGD1563578</i>     | A_44_P893322 | 9.400E-04 | 0.417 |
| <i>Ccnb1ip1</i>       | A_44_P901088 | 2.837E-02 | 0.417 |
| <i>Prss37</i>         | A_44_P276837 | 8.884E-03 | 0.417 |
| <i>Olr348</i>         | A_64_P059974 | 4.019E-03 | 0.417 |
| <i>Ccdc63</i>         | A_44_P302043 | 2.949E-03 | 0.417 |
| <i>Cpxm2</i>          | A_42_P740370 | 6.489E-03 | 0.418 |
| <i>Ces1d</i>          | A_44_P555689 | 3.251E-03 | 0.418 |
| <i>Pi15</i>           | A_64_P153916 | 1.537E-02 | 0.418 |
| <i>Olr461</i>         | A_64_P019946 | 3.574E-03 | 0.418 |
| <i>AABR07000089.1</i> | A_64_P232281 | 1.358E-02 | 0.418 |
| <i>Vom2r5</i>         | A_64_P232281 | 1.358E-02 | 0.418 |
| <i>Olr588</i>         | A_64_P052220 | 6.902E-03 | 0.418 |
| <i>Defb18</i>         | A_64_P109549 | 7.952E-03 | 0.419 |
| <i>Klf17</i>          | A_44_P464317 | 4.466E-03 | 0.419 |

|                       |               |           |       |
|-----------------------|---------------|-----------|-------|
| <i>Il18rap</i>        | A_44_P397803  | 2.812E-03 | 0.419 |
| <i>Unc13b</i>         | A_64_P036011  | 1.679E-03 | 0.420 |
| <i>LOC108349752</i>   | A_64_P320114  | 3.823E-03 | 0.421 |
| <i>Olr1733</i>        | A_44_P470576  | 1.884E-02 | 0.421 |
| <i>Clec1b</i>         | A_44_P869774  | 4.327E-02 | 0.422 |
| <i>Trim80</i>         | A_44_P422356  | 2.157E-02 | 0.422 |
| <i>Piga</i>           | A_64_P138580  | 5.200E-04 | 0.422 |
| <i>Omp</i>            | A_44_P448740  | 4.810E-02 | 0.422 |
| <i>LOC689220</i>      | A_64_P047592  | 6.626E-03 | 0.423 |
| <i>Cd300le</i>        | A_42_P585750  | 3.105E-02 | 0.423 |
| <i>Ankef1</i>         | A_64_P052705  | 3.323E-03 | 0.425 |
| <i>Adh1</i>           | A_44_P199129  | 2.711E-03 | 0.425 |
| <i>Snai1</i>          | A_44_P899293  | 2.066E-02 | 0.425 |
| <i>Habp2</i>          | A_64_P014982  | 1.738E-03 | 0.426 |
| <i>Blk</i>            | A_44_P356391  | 9.334E-03 | 0.426 |
| <i>Mrgprx4</i>        | A_64_P000192  | 2.826E-03 | 0.426 |
| <i>AABR07028262.1</i> | A_44_P351805  | 4.762E-03 | 0.426 |
| <i>Ampd1</i>          | A_44_P276087  | 1.234E-03 | 0.426 |
| <i>Rnase17</i>        | A_44_P466169  | 2.402E-03 | 0.427 |
| <i>Olr604</i>         | A_64_P034819  | 3.062E-03 | 0.427 |
| <i>Fmo9</i>           | A_64_P117190  | 2.825E-03 | 0.427 |
| <i>RGD1561445</i>     | A_44_P311862  | 1.354E-02 | 0.427 |
| <i>Olr341</i>         | A_64_P049211  | 2.212E-03 | 0.428 |
| <i>Hoxc8</i>          | A_64_P123557  | 3.282E-02 | 0.428 |
| <i>Cracr2a</i>        | A_64_P061081  | 7.100E-04 | 0.428 |
| <i>Dpys</i>           | A_44_P338501  | 2.906E-02 | 0.428 |
| <i>Olr247</i>         | A_64_P062318  | 2.794E-02 | 0.429 |
| <i>Mylk4</i>          | A_44_P464129  | 5.263E-03 | 0.429 |
| <i>LOC100909868</i>   | A_44_P217919  | 3.764E-03 | 0.429 |
| <i>LOC100912306</i>   | A_44_P217919  | 3.764E-03 | 0.429 |
| <i>Myot</i>           | A_44_P217919  | 3.764E-03 | 0.429 |
| <i>Fam122c</i>        | A_64_P136931  | 2.615E-03 | 0.429 |
| <i>Zdbf2</i>          | A_64_P016681  | 4.730E-04 | 0.430 |
| <i>Olr1304</i>        | A_44_P123461  | 4.704E-03 | 0.430 |
| <i>Stac3</i>          | A_44_P1045734 | 3.470E-03 | 0.430 |
| <i>Tas2r105</i>       | A_64_P002136  | 2.848E-03 | 0.430 |
| <i>RGD1562532</i>     | A_64_P164550  | 8.920E-04 | 0.430 |
| <i>Crim1</i>          | A_42_P538084  | 3.110E-04 | 0.431 |
| <i>Tmem182</i>        | A_44_P670825  | 2.638E-03 | 0.431 |
| <i>Scgb2a1</i>        | A_64_P105063  | 3.759E-02 | 0.431 |
| <i>Acsm5</i>          | A_64_P151353  | 4.693E-02 | 0.431 |
| <i>RGD1561226</i>     | A_64_P117115  | 3.900E-04 | 0.431 |
| <i>RSA-14-44</i>      | A_44_P113856  | 3.399E-02 | 0.431 |
| <i>AABR07016578.1</i> | A_44_P255415  | 1.226E-03 | 0.431 |

|                       |              |           |       |
|-----------------------|--------------|-----------|-------|
| <i>Hspd1-ps26</i>     | A_44_P180684 | 3.859E-03 | 0.432 |
| <i>Pfkfb1</i>         | A_64_P246032 | 9.834E-03 | 0.432 |
| <i>AABR07035091.1</i> | A_64_P031212 | 1.399E-03 | 0.432 |
| <i>Dppa1</i>          | A_64_P031212 | 1.399E-03 | 0.432 |
| <i>Mogat2</i>         | A_64_P039683 | 3.376E-02 | 0.433 |
| <i>Gpat3</i>          | A_42_P765736 | 1.447E-03 | 0.433 |
| <i>Olr137</i>         | A_64_P047137 | 8.960E-04 | 0.433 |
| <i>Aspg</i>           | A_64_P148906 | 4.292E-03 | 0.434 |
| <i>Cdh6</i>           | A_44_P141919 | 1.003E-02 | 0.434 |
| <i>Olr768</i>         | A_44_P472856 | 2.472E-02 | 0.434 |
| <i>Olr937</i>         | A_64_P163010 | 2.150E-03 | 0.434 |
| <i>Lilrb3a</i>        | A_64_P112684 | 1.453E-03 | 0.434 |
| <i>Rn60_2_1847.3</i>  | A_64_P108913 | 4.958E-02 | 0.434 |
| <i>Tas2r110</i>       | A_43_P16131  | 2.420E-03 | 0.435 |
| <i>Ctsw</i>           | A_44_P107596 | 2.727E-02 | 0.435 |
| <i>Areg</i>           | A_42_P791677 | 1.099E-02 | 0.435 |
| <i>Olr1609</i>        | A_44_P397912 | 3.759E-03 | 0.436 |
| <i>Olr747</i>         | A_64_P045156 | 2.095E-03 | 0.436 |
| <i>Olr149</i>         | A_64_P044964 | 1.145E-03 | 0.436 |
| <i>Odam</i>           | A_64_P162338 | 2.111E-03 | 0.437 |
| <i>Olr659</i>         | A_64_P061459 | 5.245E-03 | 0.438 |
| <i>Bcas1</i>          | A_64_P043886 | 1.466E-02 | 0.438 |
| <i>AABR07072894.1</i> | A_44_P264536 | 1.910E-03 | 0.439 |
| <i>Ddx60</i>          | A_64_P042917 | 1.273E-02 | 0.439 |
| <i>Wfdc18</i>         | A_64_P096907 | 9.890E-04 | 0.439 |
| <i>Ugt2a1</i>         | A_44_P408395 | 2.130E-02 | 0.439 |
| <i>Olr1332</i>        | A_64_P018336 | 3.566E-03 | 0.440 |
| <i>RGD1561230</i>     | A_64_P119179 | 1.828E-03 | 0.440 |
| <i>LOC102552619</i>   | A_64_P166052 | 4.336E-02 | 0.441 |
| <i>Ak2</i>            | A_64_P032604 | 1.201E-03 | 0.441 |
| <i>Vom1r95</i>        | A_64_P106216 | 1.830E-03 | 0.441 |
| <i>Nxn12</i>          | A_64_P160008 | 3.116E-03 | 0.441 |
| <i>LOC100912485</i>   | A_44_P531565 | 1.545E-03 | 0.441 |
| <i>Lcn1</i>           | A_42_P645186 | 1.025E-02 | 0.442 |
| <i>RGD1562080</i>     | A_44_P775185 | 3.589E-02 | 0.442 |
| <i>Tex13c</i>         | A_44_P520642 | 3.158E-02 | 0.442 |
| <i>Muc16</i>          | A_64_P141763 | 2.245E-03 | 0.442 |
| <i>Sdc4</i>           | A_64_P090747 | 4.542E-03 | 0.442 |
| <i>AABR07006120.1</i> | A_64_P031501 | 3.857E-02 | 0.442 |
| <i>Spry4</i>          | A_43_P10102  | 1.896E-03 | 0.443 |
| <i>LOC682961</i>      | A_64_P135487 | 1.965E-03 | 0.443 |
| <i>Cr2</i>            | A_44_P508580 | 1.096E-02 | 0.443 |
| <i>Nxn12</i>          | A_64_P021631 | 7.866E-03 | 0.443 |
| <i>RGD1562699</i>     | A_44_P110091 | 4.123E-03 | 0.443 |

|                       |              |           |       |
|-----------------------|--------------|-----------|-------|
| <i>Pdx1</i>           | A_64_P010623 | 9.210E-04 | 0.444 |
| <i>Plcl1</i>          | A_42_P723851 | 1.087E-03 | 0.444 |
| <i>LOC100911847</i>   | A_64_P013832 | 2.049E-03 | 0.444 |
| <i>Kif6</i>           | A_43_P15875  | 7.540E-04 | 0.445 |
| <i>Olr959</i>         | A_44_P494066 | 1.595E-03 | 0.445 |
| <i>Olr960</i>         | A_44_P494066 | 1.595E-03 | 0.445 |
| <i>Defb5</i>          | A_64_P112429 | 2.338E-02 | 0.445 |
| <i>Oxnad1</i>         | A_44_P603503 | 1.341E-02 | 0.445 |
| <i>Olr79</i>          | A_64_P082057 | 1.586E-03 | 0.445 |
| <i>RGD1559575</i>     | A_44_P417562 | 3.420E-04 | 0.445 |
| <i>Neurog1</i>        | A_64_P002432 | 3.116E-02 | 0.445 |
| <i>Olr657</i>         | A_44_P543187 | 2.988E-02 | 0.446 |
| <i>Olr720</i>         | A_64_P022664 | 2.275E-02 | 0.446 |
| <i>Parvg</i>          | A_44_P260663 | 2.519E-03 | 0.447 |
| <i>Slc25a43</i>       | A_64_P105211 | 1.345E-03 | 0.447 |
| <i>SNORA36</i>        | A_64_P105211 | 1.345E-03 | 0.447 |
| <i>Slc9c1</i>         | A_64_P045383 | 1.572E-03 | 0.447 |
| <i>AABR07062170.1</i> | A_64_P112170 | 4.127E-02 | 0.447 |
| <i>Ly49si2</i>        | A_64_P112170 | 4.127E-02 | 0.447 |
| <i>Ly49si3</i>        | A_64_P112170 | 4.127E-02 | 0.447 |
| <i>Nmu</i>            | A_64_P399235 | 1.913E-02 | 0.447 |
| <i>Klrb1</i>          | A_64_P066960 | 1.060E-03 | 0.448 |
| <i>Olr203</i>         | A_64_P029785 | 3.525E-03 | 0.448 |
| <i>Olr10</i>          | A_44_P447477 | 1.215E-03 | 0.448 |
| <i>Defb19</i>         | A_64_P015981 | 4.470E-02 | 0.448 |
| <i>LOC102557137</i>   | A_64_P165095 | 5.946E-03 | 0.448 |
| <i>Klkb1</i>          | A_43_P11534  | 1.136E-03 | 0.449 |
| <i>Hdgfl1</i>         | A_42_P461726 | 2.005E-02 | 0.449 |
| <i>Olr1243</i>        | A_64_P058075 | 2.954E-03 | 0.449 |
| <i>Cnbd1</i>          | A_64_P025773 | 1.231E-03 | 0.449 |
| <i>Akr1c12</i>        | A_64_P012373 | 2.600E-03 | 0.449 |
| <i>Agr2</i>           | A_42_P487686 | 8.237E-03 | 0.449 |
| <i>LOC680913</i>      | A_44_P806269 | 1.283E-03 | 0.449 |
| <i>Apbb1ip</i>        | A_64_P107414 | 1.227E-02 | 0.450 |
| <i>Ace2</i>           | A_64_P132696 | 1.350E-03 | 0.450 |
| <i>AABR07030544.1</i> | A_44_P395685 | 1.466E-03 | 0.450 |
| <i>Itga6</i>          | A_44_P187056 | 3.065E-02 | 0.450 |
| <i>SNORA42</i>        | A_44_P187056 | 3.065E-02 | 0.450 |
| <i>RGD1560242</i>     | A_64_P146165 | 3.392E-03 | 0.450 |
| <i>Gzmb11</i>         | A_64_P053343 | 1.478E-02 | 0.451 |
| <i>AABR07069791.4</i> | A_64_P142554 | 2.413E-03 | 0.451 |
| <i>LOC100911958</i>   | A_64_P036158 | 8.460E-04 | 0.451 |
| <i>Olr1218</i>        | A_64_P036158 | 8.460E-04 | 0.451 |
| <i>Defb15</i>         | A_64_P104340 | 9.280E-04 | 0.451 |

|                       |              |           |       |
|-----------------------|--------------|-----------|-------|
| <i>Magebl1</i>        | A_44_P407942 | 2.526E-02 | 0.451 |
| <i>Nr4a1</i>          | A_42_P682589 | 1.193E-02 | 0.452 |
| <i>Olr881</i>         | A_64_P077036 | 7.010E-04 | 0.452 |
| <i>Vom1r86</i>        | A_64_P073010 | 1.308E-03 | 0.452 |
| <i>Tmem45b</i>        | A_44_P710192 | 3.411E-02 | 0.453 |
| <i>Vom2r15</i>        | A_64_P109093 | 1.826E-03 | 0.453 |
| <i>Magea9</i>         | A_44_P543890 | 8.490E-04 | 0.453 |
| <i>Abcg3l2</i>        | A_64_P117720 | 1.993E-03 | 0.453 |
| <i>LOC100911241</i>   | A_64_P086071 | 2.085E-03 | 0.453 |
| <i>Spink9</i>         | A_64_P086071 | 2.085E-03 | 0.453 |
| <i>Pde6c</i>          | A_44_P525170 | 2.159E-03 | 0.453 |
| <i>Sik1</i>           | A_44_P424723 | 7.560E-04 | 0.454 |
| <i>LOC102551265</i>   | A_44_P258213 | 2.143E-03 | 0.454 |
| <i>Tuba8</i>          | A_44_P622992 | 3.693E-03 | 0.454 |
| <i>Sbp</i>            | A_64_P140772 | 2.005E-02 | 0.454 |
| <i>LOC100909423</i>   | A_64_P029402 | 1.187E-03 | 0.454 |
| <i>LOC100912415</i>   | A_64_P029402 | 1.187E-03 | 0.454 |
| <i>Olr1257</i>        | A_64_P029402 | 1.187E-03 | 0.454 |
| <i>Map3k5</i>         | A_64_P129293 | 8.140E-03 | 0.454 |
| <i>Hist1h2bcl1</i>    | A_64_P162197 | 2.790E-03 | 0.454 |
| <i>Vom2r65</i>        | A_64_P232257 | 1.934E-03 | 0.455 |
| <i>RGD1308751</i>     | A_64_P097872 | 1.334E-03 | 0.455 |
| <i>Hoxb1</i>          | A_64_P080424 | 5.130E-04 | 0.455 |
| <i>Ankrd1</i>         | A_44_P284753 | 1.239E-02 | 0.455 |
| <i>Irs4</i>           | A_64_P039192 | 1.316E-02 | 0.455 |
| <i>RGD1564513</i>     | A_44_P144828 | 8.280E-04 | 0.455 |
| <i>Tbx19</i>          | A_64_P026908 | 1.151E-03 | 0.456 |
| <i>Gpr151</i>         | A_64_P070999 | 7.670E-04 | 0.456 |
| <i>Prss48</i>         | A_64_P114568 | 2.172E-03 | 0.456 |
| <i>Tmprss13</i>       | A_64_P004844 | 5.064E-03 | 0.457 |
| <i>Cst5</i>           | A_64_P045226 | 1.111E-02 | 0.457 |
| <i>Lgr6</i>           | A_64_P070771 | 2.321E-02 | 0.457 |
| <i>Olr1588</i>        | A_64_P023187 | 6.660E-04 | 0.458 |
| <i>Gcnt2</i>          | A_64_P038478 | 8.640E-04 | 0.458 |
| <i>Meikin</i>         | A_64_P022555 | 6.530E-04 | 0.458 |
| <i>Slc34a3</i>        | A_44_P998384 | 1.977E-02 | 0.459 |
| <i>Olr581</i>         | A_64_P137877 | 1.071E-03 | 0.459 |
| <i>Olr190</i>         | A_64_P101707 | 4.470E-04 | 0.459 |
| <i>Csrnp1</i>         | A_44_P431774 | 1.139E-02 | 0.459 |
| <i>Slc25a21</i>       | A_64_P057995 | 9.291E-03 | 0.459 |
| <i>Stfa2</i>          | A_64_P088308 | 4.750E-04 | 0.459 |
| <i>Stfa2l2</i>        | A_64_P088308 | 4.750E-04 | 0.459 |
| <i>RGD1559726</i>     | A_44_P175703 | 2.506E-02 | 0.459 |
| <i>AABR07017902.1</i> | A_44_P405374 | 8.600E-04 | 0.460 |



|                       |               |           |       |
|-----------------------|---------------|-----------|-------|
| <i>RT1-DOa</i>        | A_44_P344228  | 1.410E-04 | 0.460 |
| <i>Olr263</i>         | A_64_P029810  | 8.960E-04 | 0.460 |
| <i>Bpifa2</i>         | A_43_P12746   | 2.370E-04 | 0.460 |
| <i>Olr880</i>         | A_64_P091648  | 2.968E-02 | 0.460 |
| <i>Cftr</i>           | A_64_P103542  | 6.140E-04 | 0.461 |
| <i>Lfng</i>           | A_64_P152014  | 2.321E-02 | 0.461 |
| <i>Rad54b</i>         | A_44_P384712  | 4.981E-02 | 0.461 |
| <i>Sowahc</i>         | A_44_P976816  | 1.916E-02 | 0.462 |
| <i>Olr367</i>         | A_64_P056806  | 7.370E-04 | 0.462 |
| <i>Glr4</i>           | A_64_P053641  | 5.550E-04 | 0.462 |
| <i>Hipk2</i>          | A_64_P065676  | 9.960E-04 | 0.462 |
| <i>Olr1533</i>        | A_64_P084288  | 1.850E-04 | 0.462 |
| <i>F12</i>            | A_43_P17945   | 1.029E-02 | 0.462 |
| <i>Klhl41</i>         | A_44_P116283  | 9.300E-04 | 0.463 |
| <i>Adgrg4</i>         | A_64_P155245  | 5.550E-03 | 0.463 |
| <i>LOC499229</i>      | A_64_P126365  | 1.043E-03 | 0.463 |
| <i>Plk2</i>           | A_44_P352268  | 6.480E-05 | 0.464 |
| <i>Olr558</i>         | A_64_P052195  | 6.740E-04 | 0.464 |
| <i>Adam30</i>         | A_44_P431338  | 3.155E-02 | 0.464 |
| <i>Tmco5a</i>         | A_64_P052697  | 3.721E-03 | 0.464 |
| <i>AABR07027141.1</i> | A_64_P096149  | 4.337E-02 | 0.464 |
| <i>RGD1565323</i>     | A_64_P004660  | 2.721E-02 | 0.464 |
| <i>AC120807.1</i>     | A_64_P023639  | 6.700E-04 | 0.465 |
| <i>Spaca1</i>         | A_64_P079967  | 1.327E-02 | 0.465 |
| <i>Olr447</i>         | A_64_P016936  | 6.070E-04 | 0.466 |
| <i>Tg</i>             | A_64_P128458  | 3.110E-05 | 0.466 |
| <i>Ffar4</i>          | A_44_P192083  | 2.548E-02 | 0.466 |
| <i>Olr1285</i>        | A_64_P024346  | 7.580E-04 | 0.466 |
| <i>Kif28p</i>         | A_64_P140055  | 5.757E-03 | 0.466 |
| <i>Olr1384</i>        | A_64_P157264  | 2.614E-02 | 0.467 |
| <i>Lrp2bp</i>         | A_44_P532115  | 4.360E-04 | 0.467 |
| <i>Bpifc</i>          | A_64_P165526  | 9.520E-04 | 0.467 |
| <i>Fosl2</i>          | A_64_P065063  | 2.440E-04 | 0.467 |
| <i>Aadacl2</i>        | A_64_P087404  | 7.100E-04 | 0.468 |
| <i>LOC100910567</i>   | A_64_P087404  | 7.100E-04 | 0.468 |
| <i>LOC362863</i>      | A_44_P966471  | 1.889E-02 | 0.468 |
| <i>Olr91</i>          | A_64_P090065  | 4.150E-04 | 0.468 |
| <i>Has3</i>           | A_64_P129549  | 4.701E-02 | 0.468 |
| <i>Vom2r25</i>        | A_64_P164300  | 9.590E-04 | 0.468 |
| <i>Col8a2</i>         | A_64_P140108  | 9.000E-04 | 0.469 |
| <i>Meig1</i>          | A_64_P082898  | 4.322E-02 | 0.469 |
| <i>AABR07069816.1</i> | A_64_P147234  | 5.490E-04 | 0.469 |
| <i>Lilrc2</i>         | A_64_P039516  | 1.164E-02 | 0.470 |
| <i>Adgrl3</i>         | A_44_P1057309 | 3.555E-02 | 0.470 |

|                       |               |           |       |
|-----------------------|---------------|-----------|-------|
| <i>Trpm6</i>          | A_64_P031058  | 1.501E-02 | 0.470 |
| <i>Klf14</i>          | A_44_P768777  | 2.821E-03 | 0.470 |
| <i>AABR07040686.1</i> | A_64_P022160  | 4.160E-02 | 0.470 |
| <i>Pcf11</i>          | A_44_P1030766 | 1.165E-02 | 0.470 |
| <i>Olr765</i>         | A_64_P098419  | 5.158E-03 | 0.470 |
| <i>Fam132a</i>        | A_44_P1050200 | 1.115E-02 | 0.470 |
| <i>LOC100360296</i>   | A_64_P027645  | 8.660E-04 | 0.471 |
| <i>Dusp4</i>          | A_64_P037879  | 8.434E-03 | 0.471 |
| <i>Defal1</i>         | A_64_P031394  | 2.560E-04 | 0.472 |
| <i>Olr1068</i>        | A_64_P118772  | 5.118E-03 | 0.472 |
| <i>Fev</i>            | A_64_P119846  | 1.149E-03 | 0.472 |
| <i>Fbp2</i>           | A_64_P096459  | 4.214E-02 | 0.473 |
| <i>Olr360</i>         | A_64_P093289  | 5.030E-04 | 0.473 |
| <i>Olr1701</i>        | A_64_P031144  | 3.922E-02 | 0.473 |
| <i>Nup62cl</i>        | A_44_P971836  | 1.792E-02 | 0.473 |
| <i>Tbx22</i>          | A_44_P206326  | 2.810E-04 | 0.474 |
| <i>Sik1</i>           | A_64_P147674  | 1.531E-03 | 0.474 |
| <i>Bcl2a1</i>         | A_42_P518855  | 1.152E-02 | 0.475 |
| <i>RGD1559731</i>     | A_64_P094666  | 3.908E-03 | 0.475 |
| <i>AABR07041949.1</i> | A_44_P552852  | 4.770E-04 | 0.475 |
| <i>Vom2r23</i>        | A_64_P319545  | 6.870E-04 | 0.476 |
| <i>Mrpl57</i>         | A_64_P123169  | 2.880E-02 | 0.476 |
| <i>Anxa8</i>          | A_42_P471653  | 2.157E-02 | 0.476 |
| <i>Olr180</i>         | A_44_P271549  | 1.291E-03 | 0.476 |
| <i>LOC102547344</i>   | A_64_P077594  | 1.546E-02 | 0.477 |
| <i>Olr183</i>         | A_64_P048596  | 6.380E-04 | 0.477 |
| <i>Cts7</i>           | A_64_P027984  | 1.079E-03 | 0.477 |
| <i>Olr508</i>         | A_44_P276185  | 8.200E-04 | 0.477 |
| <i>Olr694</i>         | A_64_P019490  | 1.215E-03 | 0.477 |
| <i>Rn50_20_0464.2</i> | A_64_P147443  | 8.623E-03 | 0.477 |
| <i>Trim59</i>         | A_44_P473329  | 3.162E-02 | 0.478 |
| <i>RGD1562035</i>     | A_44_P257824  | 2.520E-04 | 0.478 |
| <i>Olr1368</i>        | A_64_P072098  | 6.320E-04 | 0.479 |
| <i>Smim13</i>         | A_64_P072720  | 1.341E-02 | 0.479 |
| <i>Cd84</i>           | A_44_P698351  | 7.845E-03 | 0.479 |
| <i>Acot2</i>          | A_42_P597638  | 2.521E-03 | 0.479 |
| <i>Yipf7</i>          | A_44_P386824  | 1.173E-03 | 0.479 |
| <i>LOC100910599</i>   | A_64_P080627  | 4.370E-04 | 0.480 |
| <i>Olr1293</i>        | A_64_P080627  | 4.370E-04 | 0.480 |
| <i>Olr458</i>         | A_64_P045706  | 8.970E-04 | 0.480 |
| <i>Gzmc</i>           | A_64_P022125  | 1.277E-03 | 0.481 |
| <i>Cyp2ac1</i>        | A_64_P138854  | 9.610E-04 | 0.481 |
| <i>Olr841</i>         | A_64_P008396  | 1.102E-03 | 0.481 |
| <i>Crem</i>           | A_64_P126493  | 5.428E-03 | 0.481 |

|                       |               |           |       |
|-----------------------|---------------|-----------|-------|
| <i>Slc39a5</i>        | A_64_P043614  | 4.160E-04 | 0.482 |
| <i>Kcnk7</i>          | A_64_P011229  | 1.226E-03 | 0.482 |
| <i>Rp1</i>            | A_64_P136641  | 5.080E-04 | 0.482 |
| <i>Olr1742</i>        | A_44_P365332  | 1.378E-02 | 0.482 |
| <i>LOC259244</i>      | A_64_P142564  | 2.070E-04 | 0.482 |
| <i>AABR07006111.1</i> | A_44_P482595  | 3.588E-02 | 0.483 |
| <i>F11r</i>           | A_44_P482595  | 3.588E-02 | 0.483 |
| <i>Cd180</i>          | A_64_P108751  | 5.817E-03 | 0.483 |
| <i>Kcne3</i>          | A_44_P353739  | 1.930E-02 | 0.483 |
| <i>T2</i>             | A_44_P498981  | 1.011E-03 | 0.483 |
| <i>Hils1</i>          | A_64_P120881  | 8.396E-03 | 0.483 |
| <i>Vsig4</i>          | A_44_P473510  | 7.280E-04 | 0.483 |
| <i>RGD1564999</i>     | A_64_P146051  | 4.300E-02 | 0.484 |
| <i>Prss44</i>         | A_44_P119588  | 5.326E-03 | 0.484 |
| <i>Mcrip2</i>         | A_64_P054881  | 4.673E-03 | 0.484 |
| <i>Col22a1</i>        | A_44_P1037456 | 1.012E-02 | 0.484 |
| <i>LOC691352</i>      | A_64_P061933  | 2.036E-03 | 0.484 |
| <i>Timm8a2</i>        | A_64_P090369  | 1.567E-02 | 0.485 |
| <i>Htr1b</i>          | A_43_P15558   | 7.300E-04 | 0.485 |
| <i>Olr1528</i>        | A_64_P120260  | 3.890E-04 | 0.485 |
| <i>Cox6c-ps1</i>      | A_44_P285575  | 1.032E-02 | 0.485 |
| <i>Arhgef3</i>        | A_44_P521587  | 6.169E-03 | 0.485 |
| <i>Olr129</i>         | A_44_P538433  | 8.120E-04 | 0.485 |
| <i>Als2cr11</i>       | A_44_P775974  | 9.240E-04 | 0.486 |
| <i>Tpsg1</i>          | A_44_P383949  | 9.330E-04 | 0.486 |
| <i>Rnmt</i>           | A_44_P1015355 | 1.881E-02 | 0.486 |
| <i>LOC100910893</i>   | A_64_P117474  | 8.800E-04 | 0.486 |
| <i>LOC103690355</i>   | A_64_P117474  | 8.800E-04 | 0.486 |
| <i>Olr635</i>         | A_64_P117474  | 8.800E-04 | 0.486 |
| <i>Olr637</i>         | A_64_P117474  | 8.800E-04 | 0.486 |
| <i>Olr527</i>         | A_64_P139962  | 8.450E-04 | 0.486 |
| <i>Akr1c13</i>        | A_64_P006593  | 1.940E-02 | 0.486 |
| <i>Stra8</i>          | A_44_P621482  | 7.190E-04 | 0.486 |
| <i>Olr1664</i>        | A_64_P126670  | 5.920E-04 | 0.486 |
| <i>Olr1076</i>        | A_44_P524748  | 1.034E-03 | 0.486 |
| <i>Prtg</i>           | A_64_P118054  | 9.240E-04 | 0.486 |
| <i>Cpb2</i>           | A_44_P557487  | 8.320E-04 | 0.486 |
| <i>RGD1560559</i>     | A_64_P083800  | 1.097E-03 | 0.486 |
| <i>Gcnt1</i>          | A_64_P038462  | 8.076E-03 | 0.487 |
| <i>Mdfic</i>          | A_42_P830301  | 3.027E-03 | 0.487 |
| <i>Gdf3</i>           | A_64_P066679  | 2.296E-02 | 0.487 |
| <i>Cts8</i>           | A_64_P017829  | 1.151E-03 | 0.487 |
| <i>LOC100911999</i>   | A_44_P189329  | 3.170E-03 | 0.487 |
| <i>Olr1225</i>        | A_44_P189329  | 3.170E-03 | 0.487 |

|                       |              |           |       |
|-----------------------|--------------|-----------|-------|
| <i>Crh</i>            | A_43_P12478  | 1.944E-02 | 0.487 |
| <i>RGD1561145</i>     | A_44_P624451 | 1.101E-03 | 0.487 |
| <i>Olr1022</i>        | A_64_P101770 | 7.790E-04 | 0.487 |
| <i>Tph1</i>           | A_44_P306204 | 2.245E-02 | 0.487 |
| <i>Cgm4</i>           | A_64_P086590 | 6.850E-04 | 0.488 |
| <i>Fat3</i>           | A_43_P15416  | 3.284E-03 | 0.488 |
| <i>Cfap97</i>         | A_43_P21680  | 2.290E-04 | 0.488 |
| <i>LOC103689988</i>   | A_64_P025813 | 5.730E-04 | 0.489 |
| <i>Olr1081</i>        | A_64_P077026 | 1.928E-03 | 0.489 |
| <i>Impg1</i>          | A_44_P242921 | 9.174E-03 | 0.489 |
| <i>RGD1559903</i>     | A_64_P024585 | 1.785E-02 | 0.489 |
| <i>RGD1564941</i>     | A_44_P187379 | 2.550E-04 | 0.489 |
| <i>Prl5a1</i>         | A_64_P087276 | 1.736E-03 | 0.489 |
| <i>Olr754</i>         | A_44_P348952 | 1.752E-03 | 0.489 |
| <i>Fmo2</i>           | A_64_P091088 | 4.060E-04 | 0.490 |
| <i>AABR07048966.1</i> | A_64_P249426 | 1.696E-03 | 0.490 |
| <i>4933416C03Rik</i>  | A_44_P883619 | 1.729E-03 | 0.490 |
| <i>Sash3</i>          | A_44_P956203 | 1.833E-03 | 0.490 |
| <i>AC099360.1</i>     | A_64_P031020 | 1.567E-03 | 0.490 |
| <i>Olr1049</i>        | A_64_P017966 | 3.250E-04 | 0.490 |
| <i>Olr1007</i>        | A_44_P186989 | 1.919E-03 | 0.490 |
| <i>Ankrd53</i>        | A_64_P074226 | 6.738E-03 | 0.490 |
| <i>Olr601</i>         | A_64_P118812 | 1.457E-03 | 0.490 |
| <i>Lxn</i>            | A_43_P12624  | 2.652E-02 | 0.490 |
| <i>Eml1</i>           | A_44_P208779 | 3.794E-02 | 0.490 |
| <i>Il7r</i>           | A_44_P828142 | 6.730E-04 | 0.491 |
| <i>Echdc2</i>         | A_44_P217189 | 2.801E-02 | 0.491 |
| <i>Panx3</i>          | A_44_P465856 | 1.427E-03 | 0.491 |
| <i>Clca5</i>          | A_64_P119254 | 2.128E-03 | 0.491 |
| <i>LOC100912252</i>   | A_44_P575367 | 1.055E-03 | 0.491 |
| <i>Crem</i>           | A_43_P11922  | 1.293E-02 | 0.491 |
| <i>Sesn3</i>          | A_44_P527795 | 5.820E-04 | 0.491 |
| <i>RGD2301395</i>     | A_64_P017464 | 1.841E-03 | 0.491 |
| <i>Olr1551</i>        | A_64_P042327 | 8.160E-04 | 0.491 |
| <i>AABR07069011.1</i> | A_64_P111734 | 5.790E-04 | 0.492 |
| <i>Mmp1b</i>          | A_64_P111734 | 5.790E-04 | 0.492 |
| <i>Hist1h1b</i>       | A_64_P066979 | 4.537E-02 | 0.492 |
| <i>LOC688924</i>      | A_64_P119390 | 2.414E-03 | 0.492 |
| <i>Cspg4</i>          | A_42_P696084 | 2.765E-02 | 0.492 |
| <i>Fam46b</i>         | A_44_P497121 | 3.315E-03 | 0.492 |
| <i>AABR07066201.1</i> | A_64_P126739 | 9.700E-04 | 0.493 |
| <i>LOC301165</i>      | A_64_P126739 | 9.700E-04 | 0.493 |
| <i>Olr1619</i>        | A_64_P152047 | 1.019E-03 | 0.493 |
| <i>Tmprss11c</i>      | A_44_P454300 | 1.900E-03 | 0.493 |

|                       |              |           |       |
|-----------------------|--------------|-----------|-------|
| <i>Olr951</i>         | A_64_P060745 | 2.531E-03 | 0.493 |
| <i>Olr93</i>          | A_64_P071525 | 2.065E-03 | 0.493 |
| <i>RGD1560958</i>     | A_44_P821368 | 1.092E-03 | 0.493 |
| <i>Olr1456</i>        | A_44_P111759 | 1.265E-03 | 0.493 |
| <i>Tnfsf10</i>        | A_42_P733671 | 5.370E-04 | 0.493 |
| <i>Tyrrp1</i>         | A_64_P140025 | 3.826E-02 | 0.494 |
| <i>LOC100911127</i>   | A_44_P470555 | 2.933E-03 | 0.494 |
| <i>Olr1288</i>        | A_44_P470555 | 2.933E-03 | 0.494 |
| <i>Lpar4</i>          | A_44_P902018 | 3.642E-02 | 0.494 |
| <i>Tecrl</i>          | A_44_P302124 | 2.892E-03 | 0.494 |
| <i>Dnajb7</i>         | A_44_P591036 | 2.310E-04 | 0.494 |
| <i>Uts2b</i>          | A_64_P135567 | 2.062E-02 | 0.494 |
| <i>Olr1318</i>        | A_64_P014742 | 1.954E-02 | 0.494 |
| <i>Olr1320</i>        | A_64_P014742 | 1.954E-02 | 0.494 |
| <i>Psg29</i>          | A_64_P055418 | 1.062E-03 | 0.494 |
| <i>lbsp</i>           | A_44_P255216 | 1.543E-02 | 0.494 |
| <i>Taar7h</i>         | A_64_P004869 | 3.260E-04 | 0.495 |
| <i>AABR07062108.1</i> | A_64_P121747 | 2.707E-03 | 0.495 |
| <i>Olr1321</i>        | A_64_P080706 | 3.158E-03 | 0.495 |
| <i>Mefv</i>           | A_64_P120624 | 1.569E-03 | 0.495 |
| <i>Pex11a</i>         | A_64_P027868 | 4.222E-03 | 0.495 |
| <i>AABR07065406.1</i> | A_64_P004239 | 3.250E-04 | 0.495 |
| <i>LOC100911956</i>   | A_64_P004239 | 3.250E-04 | 0.495 |
| <i>AABR07052831.1</i> | A_64_P119533 | 2.628E-03 | 0.495 |
| <i>Pramef27</i>       | A_44_P760567 | 9.580E-04 | 0.495 |
| <i>Mogat2</i>         | A_64_P118982 | 1.800E-02 | 0.495 |
| <i>PIK3C2G</i>        | A_44_P427177 | 7.480E-04 | 0.495 |
| <i>Serpina9</i>       | A_44_P333319 | 3.237E-03 | 0.495 |
| <i>Serpinb6e</i>      | A_44_P529880 | 2.312E-03 | 0.496 |
| <i>Olr587</i>         | A_64_P139990 | 1.178E-03 | 0.496 |
| <i>LOC100912067</i>   | A_64_P102196 | 8.990E-04 | 0.496 |
| <i>LOC100912245</i>   | A_64_P102196 | 8.990E-04 | 0.496 |
| <i>Olr1219</i>        | A_64_P102196 | 8.990E-04 | 0.496 |
| <i>Vom1r62</i>        | A_64_P009280 | 3.467E-03 | 0.496 |
| <i>Olr1251</i>        | A_64_P161261 | 3.182E-03 | 0.496 |
| <i>Adgrg2</i>         | A_64_P170299 | 1.051E-03 | 0.496 |
| <i>Hyal6</i>          | A_44_P606100 | 3.239E-03 | 0.496 |
| <i>Ly49si1</i>        | A_64_P077692 | 4.820E-04 | 0.496 |
| <i>LOC102553892</i>   | A_44_P989639 | 1.226E-03 | 0.496 |
| <i>RGD1564380</i>     | A_44_P989639 | 1.226E-03 | 0.496 |
| <i>RGD1565655</i>     | A_44_P989639 | 1.226E-03 | 0.496 |
| <i>Clec3a</i>         | A_64_P141187 | 2.583E-03 | 0.496 |
| <i>Apol11a</i>        | A_44_P267706 | 1.184E-03 | 0.497 |
| <i>Atp13a3</i>        | A_44_P255095 | 7.500E-04 | 0.497 |

|                       |               |           |       |
|-----------------------|---------------|-----------|-------|
| <i>Ceacam3</i>        | A_64_P136252  | 3.682E-03 | 0.497 |
| <i>Cdr2</i>           | A_64_P018071  | 1.135E-03 | 0.497 |
| <i>AABR07001888.1</i> | A_64_P010946  | 6.870E-04 | 0.498 |
| <i>LOC108348087</i>   | A_64_P030050  | 3.850E-03 | 0.498 |
| <i>Vom1r11</i>        | A_64_P030050  | 3.850E-03 | 0.498 |
| <i>RT1-Da</i>         | A_44_P991532  | 2.428E-03 | 0.498 |
| <i>Pdk4</i>           | A_44_P231269  | 3.470E-03 | 0.498 |
| <i>AABR07006310.1</i> | A_44_P115116  | 9.560E-04 | 0.498 |
| <i>LOC691519</i>      | A_64_P060419  | 1.957E-03 | 0.498 |
| <i>Olr701</i>         | A_64_P097472  | 1.600E-03 | 0.498 |
| <i>C3ar1</i>          | A_64_P166460  | 3.846E-03 | 0.498 |
| <i>C4bpb</i>          | A_64_P007633  | 3.538E-02 | 0.498 |
| <i>Tnp2</i>           | A_64_P094915  | 3.749E-03 | 0.498 |
| <i>LOC689618</i>      | A_64_P151795  | 3.818E-03 | 0.498 |
| <i>Klb</i>            | A_44_P545935  | 6.290E-04 | 0.498 |
| <i>Hoxa9</i>          | A_44_P502252  | 3.802E-03 | 0.498 |
| <i>LOC103689925</i>   | A_44_P502252  | 3.802E-03 | 0.498 |
| <i>LOC103692128</i>   | A_44_P502252  | 3.802E-03 | 0.498 |
| <i>LOC100912340</i>   | A_64_P100718  | 1.054E-03 | 0.499 |
| <i>LOC108350225</i>   | A_64_P100718  | 1.054E-03 | 0.499 |
| <i>Olr1259</i>        | A_64_P100718  | 1.054E-03 | 0.499 |
| <i>P2ry13</i>         | A_44_P1010416 | 3.035E-02 | 0.499 |
| <i>Siglec5</i>        | A_64_P165666  | 7.870E-04 | 0.499 |
| <i>Sult1b1</i>        | A_64_P053257  | 2.658E-03 | 0.499 |
| <i>RGD1564748</i>     | A_44_P370607  | 4.172E-03 | 0.499 |
| <i>Irx1</i>           | A_64_P040734  | 1.120E-03 | 0.499 |
| <i>Hmx2</i>           | A_64_P072103  | 3.383E-03 | 0.499 |
| <i>Nipal1</i>         | A_64_P104444  | 3.498E-03 | 0.499 |
| <i>Olr697</i>         | A_44_P320724  | 1.179E-03 | 0.499 |
| <i>Lrrc57</i>         | A_44_P163816  | 1.518E-02 | 2.002 |
| <i>Xkr6</i>           | A_64_P066256  | 6.520E-04 | 2.002 |
| <i>Adrm1</i>          | A_42_P539352  | 1.907E-02 | 2.003 |
| <i>Lrfn1</i>          | A_44_P187264  | 5.343E-03 | 2.004 |
| <i>St6galnac5</i>     | A_44_P101533  | 1.669E-03 | 2.005 |
| <i>Zfp385a</i>        | A_64_P010643  | 4.117E-03 | 2.006 |
| <i>Dgke</i>           | A_64_P105412  | 2.324E-03 | 2.007 |
| <i>Cdh10</i>          | A_44_P374883  | 9.380E-03 | 2.007 |
| <i>Pth2</i>           | A_64_P128785  | 4.210E-04 | 2.008 |
| <i>Bcl11b</i>         | A_44_P185355  | 1.633E-02 | 2.009 |
| <i>Pnma2</i>          | A_43_P23245   | 1.254E-03 | 2.011 |
| <i>Ocln</i>           | A_64_P107229  | 1.742E-02 | 2.011 |
| <i>Sf3b4</i>          | A_42_P828934  | 2.870E-05 | 2.012 |
| <i>Cygb</i>           | A_44_P428455  | 2.152E-02 | 2.013 |
| <i>Pkp2</i>           | A_44_P999507  | 5.713E-03 | 2.014 |

|                       |              |           |       |
|-----------------------|--------------|-----------|-------|
| <i>Mk1</i>            | A_44_P215131 | 2.884E-03 | 2.014 |
| <i>Zfp395</i>         | A_64_P073653 | 3.618E-03 | 2.016 |
| <i>Nup210l</i>        | A_64_P053307 | 7.275E-03 | 2.016 |
| <i>Opr1</i>           | A_64_P125150 | 1.308E-03 | 2.020 |
| <i>Slc38a1</i>        | A_44_P264785 | 4.333E-03 | 2.020 |
| <i>Hpca</i>           | A_64_P165964 | 4.286E-02 | 2.021 |
| <i>AABR07028237.1</i> | A_64_P038342 | 1.516E-02 | 2.022 |
| <i>LOC100362965</i>   | A_64_P038342 | 1.516E-02 | 2.022 |
| <i>Olr96</i>          | A_44_P412022 | 7.420E-03 | 2.022 |
| <i>Pax5</i>           | A_64_P064099 | 5.981E-03 | 2.023 |
| <i>Xkr6</i>           | A_64_P066251 | 8.863E-03 | 2.023 |
| <i>Kit</i>            | A_64_P117011 | 1.140E-02 | 2.026 |
| <i>RGD1561444</i>     | A_44_P284067 | 1.863E-02 | 2.026 |
| <i>Grin1</i>          | A_43_P11774  | 1.159E-02 | 2.026 |
| <i>Syn1</i>           | A_64_P295251 | 6.950E-04 | 2.030 |
| <i>Cpne6</i>          | A_64_P024725 | 1.103E-02 | 2.030 |
| <i>Arrdc2</i>         | A_64_P072227 | 1.006E-03 | 2.033 |
| <i>Snta1</i>          | A_64_P162387 | 1.416E-03 | 2.034 |
| <i>Smpdl3b</i>        | A_43_P23215  | 2.743E-03 | 2.035 |
| <i>Spire2</i>         | A_64_P126330 | 6.495E-03 | 2.035 |
| <i>Spata2L</i>        | A_64_P064366 | 3.297E-03 | 2.035 |
| <i>Ssbp3</i>          | A_44_P115378 | 2.665E-03 | 2.036 |
| <i>Cers4</i>          | A_64_P105928 | 1.130E-03 | 2.036 |
| <i>Foxj2</i>          | A_64_P066217 | 8.876E-03 | 2.037 |
| <i>B3galt5</i>        | A_64_P132199 | 2.889E-02 | 2.037 |
| <i>Tmem47</i>         | A_64_P030140 | 2.792E-02 | 2.038 |
| <i>Bag2</i>           | A_64_P053461 | 2.753E-02 | 2.039 |
| <i>Ackr4</i>          | A_64_P027138 | 3.315E-03 | 2.039 |
| <i>Calcoco1</i>       | A_64_P063503 | 1.687E-02 | 2.040 |
| <i>LOC100912282</i>   | A_64_P063503 | 1.687E-02 | 2.040 |
| <i>Med12</i>          | A_44_P222710 | 3.916E-03 | 2.040 |
| <i>Safb</i>           | A_44_P499851 | 1.160E-03 | 2.041 |
| <i>Cdnf</i>           | A_64_P126750 | 1.444E-02 | 2.042 |
| <i>Gpat2</i>          | A_64_P079448 | 7.106E-03 | 2.042 |
| <i>Olr259</i>         | A_44_P552624 | 3.909E-03 | 2.044 |
| <i>Wfdc10a</i>        | A_64_P117173 | 8.990E-05 | 2.045 |
| <i>Tnni2</i>          | A_42_P718022 | 3.660E-04 | 2.045 |
| <i>Nsg2</i>           | A_42_P822838 | 2.294E-02 | 2.046 |
| <i>Rab3d</i>          | A_44_P243111 | 2.195E-02 | 2.048 |
| <i>Atn1</i>           | A_64_P013456 | 3.464E-02 | 2.048 |
| <i>LOC100911672</i>   | A_64_P013456 | 3.464E-02 | 2.048 |
| <i>Ccar2</i>          | A_44_P561254 | 1.230E-04 | 2.048 |
| <i>Coq8a</i>          | A_44_P165999 | 1.414E-02 | 2.051 |
| <i>Cttnbp2</i>        | A_43_P21156  | 1.691E-03 | 2.051 |

|                   |               |           |       |
|-------------------|---------------|-----------|-------|
| <i>Tesc</i>       | A_44_P346832  | 1.780E-05 | 2.052 |
| <i>Nlgn3</i>      | A_64_P062495  | 3.158E-03 | 2.053 |
| <i>Cacng7</i>     | A_64_P065519  | 8.240E-04 | 2.054 |
| <i>Gpkow</i>      | A_64_P074760  | 1.423E-03 | 2.054 |
| <i>Olr774</i>     | A_44_P461231  | 4.759E-03 | 2.057 |
| <i>Zfhx2</i>      | A_64_P031875  | 1.108E-02 | 2.058 |
| <i>Kif3c</i>      | A_43_P12822   | 4.610E-04 | 2.058 |
| <i>Ubl5</i>       | A_44_P999329  | 8.623E-03 | 2.059 |
| <i>Stx1b</i>      | A_44_P259516  | 4.470E-03 | 2.059 |
| <i>Hspa12a</i>    | A_44_P256786  | 7.120E-04 | 2.060 |
| <i>Camk2g</i>     | A_44_P491824  | 2.250E-02 | 2.060 |
| <i>Hdac7</i>      | A_64_P088475  | 1.090E-04 | 2.060 |
| <i>Bcl11a</i>     | A_64_P105903  | 1.883E-03 | 2.061 |
| <i>Dnmt3a</i>     | A_44_P374741  | 4.409E-03 | 2.061 |
| <i>Wipf3</i>      | A_64_P163416  | 4.880E-04 | 2.061 |
| <i>Sdc3</i>       | A_44_P929767  | 3.678E-03 | 2.061 |
| <i>Crebrf</i>     | A_64_P073658  | 9.737E-03 | 2.062 |
| <i>Zfp280b</i>    | A_64_P058888  | 2.221E-03 | 2.066 |
| <i>Rgs11</i>      | A_64_P095895  | 3.389E-02 | 2.068 |
| <i>Fn3k</i>       | A_64_P042885  | 2.037E-02 | 2.070 |
| <i>Bst1</i>       | A_64_P079751  | 2.994E-03 | 2.070 |
| <i>Chrm4</i>      | A_43_P15933   | 3.397E-02 | 2.072 |
| <i>Carmil2</i>    | A_44_P100729  | 1.830E-04 | 2.080 |
| <i>RGD1310209</i> | A_64_P134426  | 1.733E-02 | 2.081 |
| <i>Fmnl1</i>      | A_44_P297974  | 1.936E-03 | 2.082 |
| <i>Pfkl</i>       | A_64_P163510  | 6.407E-03 | 2.083 |
| <i>Lpin1</i>      | A_44_P191309  | 7.293E-03 | 2.083 |
| <i>Rab5b</i>      | A_42_P795009  | 5.310E-03 | 2.085 |
| <i>Otub2</i>      | A_44_P359052  | 1.638E-03 | 2.085 |
| <i>Anln</i>       | A_64_P022412  | 1.863E-03 | 2.089 |
| <i>Anln1</i>      | A_64_P022412  | 1.863E-03 | 2.089 |
| <i>Chst12</i>     | A_44_P1003333 | 2.267E-03 | 2.090 |
| <i>Steap3</i>     | A_43_P15597   | 7.640E-05 | 2.090 |
| <i>Pdk2</i>       | A_42_P472375  | 3.916E-03 | 2.091 |
| <i>LOC498759</i>  | A_64_P132096  | 1.043E-03 | 2.092 |
| <i>Exoc6b</i>     | A_44_P838165  | 1.401E-02 | 2.092 |
| <i>Foxi3</i>      | A_64_P137545  | 1.220E-02 | 2.095 |
| <i>Herc3</i>      | A_44_P547045  | 7.368E-03 | 2.095 |
| <i>Prlhr</i>      | A_64_P136198  | 1.298E-03 | 2.096 |
| <i>Slc44a5</i>    | A_44_P386965  | 4.675E-02 | 2.099 |
| <i>Inpp5j</i>     | A_44_P201178  | 6.470E-03 | 2.099 |
| <i>Slc6a18</i>    | A_64_P128852  | 6.870E-04 | 2.100 |
| <i>Sez6l2</i>     | A_44_P884739  | 2.688E-02 | 2.102 |
| <i>Rnf112</i>     | A_42_P758200  | 5.608E-03 | 2.102 |



|                       |               |           |       |
|-----------------------|---------------|-----------|-------|
| <i>Dmxi2</i>          | A_44_P187706  | 9.330E-04 | 2.102 |
| <i>Git1</i>           | A_64_P081884  | 3.500E-04 | 2.104 |
| <i>Tas2r104</i>       | A_64_P140128  | 3.146E-02 | 2.104 |
| <i>Allc</i>           | A_44_P454444  | 8.900E-04 | 2.105 |
| <i>Palm</i>           | A_64_P131965  | 1.930E-03 | 2.107 |
| <i>Zfp112</i>         | A_64_P151206  | 1.738E-03 | 2.108 |
| <i>Sipa1l3</i>        | A_64_P142809  | 1.240E-03 | 2.109 |
| <i>Slc8a2</i>         | A_64_P125019  | 2.719E-02 | 2.109 |
| <i>Zfpm2</i>          | A_44_P180731  | 1.052E-02 | 2.111 |
| <i>Triml2</i>         | A_64_P227140  | 4.193E-03 | 2.111 |
| <i>Nfasc</i>          | A_44_P727294  | 4.439E-03 | 2.112 |
| <i>Pacsin1</i>        | A_64_P163474  | 7.958E-03 | 2.112 |
| <i>Sf3a2</i>          | A_64_P158589  | 1.670E-03 | 2.113 |
| <i>LOC103689958</i>   | A_64_P149178  | 3.225E-03 | 2.114 |
| <i>Olr1l</i>          | A_64_P149178  | 3.225E-03 | 2.114 |
| <i>RGD1561114</i>     | A_64_P012158  | 3.301E-03 | 2.115 |
| <i>St6galnac3</i>     | A_43_P11940   | 3.520E-04 | 2.115 |
| <i>Dmrtc2</i>         | A_64_P145043  | 1.910E-05 | 2.117 |
| <i>LOC100910371</i>   | A_64_P145043  | 1.910E-05 | 2.117 |
| <i>Ackr3</i>          | A_44_P252483  | 8.422E-03 | 2.119 |
| <i>Mrpl38</i>         | A_64_P047401  | 1.529E-02 | 2.119 |
| <i>Gprin3</i>         | A_64_P079220  | 3.210E-04 | 2.121 |
| <i>Hus1b</i>          | A_64_P046939  | 3.897E-02 | 2.121 |
| <i>LOC103690165</i>   | A_64_P046939  | 3.897E-02 | 2.121 |
| <i>Fcer1g</i>         | A_44_P1053404 | 4.275E-02 | 2.122 |
| <i>Barhl1</i>         | A_64_P068329  | 1.772E-02 | 2.129 |
| <i>Ptk2b</i>          | A_64_P154484  | 1.420E-03 | 2.129 |
| <i>Hmcn2</i>          | A_64_P101910  | 2.240E-04 | 2.130 |
| <i>Gna14</i>          | A_44_P377396  | 1.582E-02 | 2.130 |
| <i>Prkag2</i>         | A_44_P341870  | 9.196E-03 | 2.131 |
| <i>Ring1</i>          | A_64_P142031  | 3.292E-03 | 2.133 |
| <i>Fcrla</i>          | A_64_P010980  | 2.622E-02 | 2.135 |
| <i>Rn60_7_1026.2</i>  | A_64_P010980  | 2.622E-02 | 2.135 |
| <i>Ctnnd1</i>         | A_42_P773732  | 2.705E-02 | 2.137 |
| <i>Adam2</i>          | A_44_P271511  | 3.095E-03 | 2.138 |
| <i>Grin1</i>          | A_64_P085896  | 3.675E-03 | 2.140 |
| <i>AABR07024682.1</i> | A_64_P018361  | 1.027E-02 | 2.140 |
| <i>RGD1559804</i>     | A_64_P018361  | 1.027E-02 | 2.140 |
| <i>Mtmr6</i>          | A_64_P012606  | 1.106E-02 | 2.142 |
| <i>Fzd1</i>           | A_44_P170527  | 4.663E-03 | 2.143 |
| <i>AABR07029863.4</i> | A_64_P157984  | 1.319E-03 | 2.143 |
| <i>Nol6</i>           | A_64_P089728  | 5.913E-03 | 2.146 |
| <i>Mutyh</i>          | A_64_P007332  | 1.194E-02 | 2.147 |
| <i>Pik3cd</i>         | A_44_P956502  | 2.622E-03 | 2.148 |

|                       |               |           |       |
|-----------------------|---------------|-----------|-------|
| <i>Stx11</i>          | A_44_P101700  | 6.592E-03 | 2.150 |
| <i>Cpne6</i>          | A_64_P157611  | 2.664E-02 | 2.151 |
| <i>Ptpn7</i>          | A_42_P653257  | 4.871E-03 | 2.152 |
| <i>Il16</i>           | A_64_P052835  | 1.846E-02 | 2.154 |
| <i>Fbxl16</i>         | A_44_P851961  | 1.494E-03 | 2.154 |
| <i>LOC100912228</i>   | A_64_P137042  | 3.791E-02 | 2.154 |
| <i>Npy</i>            | A_64_P137042  | 3.791E-02 | 2.154 |
| <i>AABR07057678.1</i> | A_44_P791165  | 1.077E-02 | 2.154 |
| <i>Ptpr</i>           | A_44_P325863  | 1.295E-02 | 2.160 |
| <i>LOC103690141</i>   | A_64_P087564  | 1.156E-03 | 2.160 |
| <i>Ccne2</i>          | A_44_P272210  | 3.910E-03 | 2.160 |
| <i>Cacnb3</i>         | A_44_P245314  | 1.505E-02 | 2.161 |
| <i>Gpr137c</i>        | A_64_P160333  | 2.308E-02 | 2.164 |
| <i>Adcy7</i>          | A_64_P083918  | 1.082E-03 | 2.164 |
| <i>Pum1</i>           | A_42_P767897  | 7.760E-04 | 2.166 |
| <i>Grip2</i>          | A_64_P041045  | 9.160E-03 | 2.168 |
| <i>Atp6v1g2</i>       | A_44_P484719  | 1.442E-02 | 2.169 |
| <i>H2afx</i>          | A_44_P988451  | 2.050E-04 | 2.170 |
| <i>Zdhhc23</i>        | A_64_P160556  | 5.527E-03 | 2.171 |
| <i>Opr1</i>           | A_43_P12591   | 7.213E-03 | 2.171 |
| <i>Adam7</i>          | A_64_P159300  | 3.070E-04 | 2.176 |
| <i>Mdga1</i>          | A_43_P22225   | 1.532E-02 | 2.179 |
| <i>Kat2a</i>          | A_44_P478570  | 2.067E-03 | 2.180 |
| <i>Otol1</i>          | A_64_P092787  | 1.880E-02 | 2.181 |
| <i>Fibcd1</i>         | A_64_P110394  | 1.714E-03 | 2.182 |
| <i>Fibcd11</i>        | A_64_P110394  | 1.714E-03 | 2.182 |
| <i>Wfdc3</i>          | A_44_P1007870 | 1.789E-02 | 2.182 |
| <i>Rn50_X_0747.1</i>  | A_64_P071755  | 3.213E-02 | 2.183 |
| <i>Pxylp1</i>         | A_44_P837888  | 2.015E-02 | 2.184 |
| <i>Asxl3</i>          | A_64_P074514  | 6.817E-03 | 2.184 |
| <i>Asb13</i>          | A_64_P003209  | 1.641E-03 | 2.185 |
| <i>Mpp2</i>           | A_44_P189542  | 1.770E-04 | 2.185 |
| <i>Nlgn1</i>          | A_64_P001177  | 1.085E-02 | 2.185 |
| <i>Hcn2</i>           | A_43_P15654   | 1.889E-03 | 2.186 |
| <i>Gal3st3</i>        | A_64_P083705  | 2.547E-03 | 2.189 |
| <i>Mgat4a</i>         | A_64_P146203  | 2.332E-03 | 2.189 |
| <i>Atxn2l</i>         | A_64_P001745  | 1.311E-02 | 2.191 |
| <i>Tmem74</i>         | A_44_P959683  | 1.673E-02 | 2.192 |
| <i>Aplp2</i>          | A_42_P502759  | 3.133E-03 | 2.197 |
| <i>Olr1694</i>        | A_64_P040895  | 4.862E-02 | 2.197 |
| <i>Prkce</i>          | A_64_P023523  | 5.520E-04 | 2.199 |
| <i>Cfc1</i>           | A_44_P1028743 | 4.011E-03 | 2.202 |
| <i>LOC108348155</i>   | A_64_P156448  | 6.620E-05 | 2.207 |
| <i>RGD1561143</i>     | A_64_P156448  | 6.620E-05 | 2.207 |

|                  |               |           |       |
|------------------|---------------|-----------|-------|
| <i>Foxo6</i>     | A_64_P139559  | 7.870E-04 | 2.215 |
| <i>Pfn1</i>      | A_44_P132470  | 4.400E-04 | 2.219 |
| <i>Lyzl6</i>     | A_64_P018206  | 1.820E-04 | 2.221 |
| <i>Olr799</i>    | A_44_P194029  | 1.840E-03 | 2.222 |
| <i>Atp1a3</i>    | A_44_P400177  | 5.900E-04 | 2.223 |
| <i>Otop3</i>     | A_44_P548864  | 2.720E-03 | 2.225 |
| <i>Gfra2</i>     | A_42_P791436  | 2.209E-03 | 2.228 |
| <i>Lynx1</i>     | A_44_P1047315 | 1.142E-02 | 2.231 |
| <i>Gjd2</i>      | A_64_P025242  | 2.585E-02 | 2.233 |
| <i>Gprc5c</i>    | A_64_P132981  | 1.178E-02 | 2.233 |
| <i>Pianp</i>     | A_64_P062969  | 2.570E-03 | 2.235 |
| <i>Sesn1</i>     | A_64_P389571  | 6.078E-03 | 2.235 |
| <i>Tas1r2</i>    | A_64_P040483  | 4.193E-02 | 2.236 |
| <i>Rasgef1c</i>  | A_44_P577108  | 3.246E-02 | 2.237 |
| <i>Epb41l4b</i>  | A_64_P052522  | 1.066E-02 | 2.238 |
| <i>Pnliprp2</i>  | A_43_P13060   | 1.966E-02 | 2.240 |
| <i>Mbd6</i>      | A_44_P305852  | 9.225E-03 | 2.241 |
| <i>Kcnc3</i>     | A_64_P007439  | 6.273E-03 | 2.241 |
| <i>Rhob</i>      | A_43_P12245   | 5.721E-03 | 2.241 |
| <i>Sh3bgrl3</i>  | A_44_P1000232 | 3.513E-03 | 2.243 |
| <i>Sphkap</i>    | A_64_P122624  | 4.238E-02 | 2.245 |
| <i>LOC362795</i> | A_64_P391863  | 7.612E-03 | 2.250 |
| <i>Gck</i>       | A_64_P026943  | 3.995E-03 | 2.253 |
| <i>Rnf182</i>    | A_44_P856900  | 2.633E-03 | 2.255 |
| <i>Dnm1</i>      | A_64_P144223  | 1.050E-03 | 2.255 |
| <i>Polr3a</i>    | A_64_P033820  | 2.690E-04 | 2.255 |
| <i>Cmtm2a</i>    | A_64_P050974  | 3.777E-02 | 2.257 |
| <i>Amer1</i>     | A_64_P043601  | 4.420E-05 | 2.258 |
| <i>Prss57</i>    | A_64_P072868  | 4.554E-02 | 2.261 |
| <i>Mink1</i>     | A_64_P031349  | 2.399E-02 | 2.266 |
| <i>Pml</i>       | A_64_P090518  | 7.567E-03 | 2.268 |
| <i>Plppr1</i>    | A_64_P128290  | 3.016E-03 | 2.269 |
| <i>Chrna5</i>    | A_43_P15448   | 5.717E-03 | 2.275 |
| <i>Lrfn1</i>     | A_64_P042086  | 1.998E-03 | 2.278 |
| <i>Card14</i>    | A_64_P094249  | 1.425E-02 | 2.278 |
| <i>Sh2d3c</i>    | A_64_P010298  | 2.436E-03 | 2.281 |
| <i>Cfap57</i>    | A_64_P025664  | 1.300E-02 | 2.281 |
| <i>Ccng2</i>     | A_42_P715070  | 1.975E-02 | 2.284 |
| <i>Npc1l1</i>    | A_44_P397836  | 2.786E-02 | 2.295 |
| <i>Orai2</i>     | A_64_P019331  | 5.543E-03 | 2.299 |
| <i>Hrk</i>       | A_42_P768355  | 2.340E-03 | 2.304 |
| <i>B9d2</i>      | A_64_P125305  | 2.050E-02 | 2.314 |
| <i>Npw</i>       | A_64_P050084  | 9.321E-03 | 2.317 |
| <i>Nrgn</i>      | A_42_P687133  | 7.475E-03 | 2.320 |

|                       |              |           |       |
|-----------------------|--------------|-----------|-------|
| <i>Cabin1</i>         | A_64_P094362 | 2.095E-03 | 2.327 |
| <i>Nhlh1</i>          | A_42_P771201 | 5.181E-03 | 2.337 |
| <i>Cfap43</i>         | A_64_P160082 | 3.456E-02 | 2.343 |
| <i>Dyrk1b</i>         | A_64_P131903 | 9.060E-04 | 2.344 |
| <i>Zfp575</i>         | A_64_P089285 | 5.088E-03 | 2.354 |
| <i>Pfkl</i>           | A_64_P163511 | 1.288E-02 | 2.355 |
| <i>Tmem269</i>        | A_44_P606216 | 2.434E-02 | 2.357 |
| <i>Cdh11</i>          | A_44_P961744 | 1.854E-02 | 2.357 |
| <i>Cblb</i>           | A_44_P198539 | 6.710E-04 | 2.360 |
| <i>Mpped2</i>         | A_44_P219695 | 2.210E-04 | 2.362 |
| <i>Camk2b</i>         | A_64_P092342 | 2.251E-03 | 2.363 |
| <i>Rasl10a</i>        | A_44_P336075 | 3.765E-02 | 2.365 |
| <i>Mei1</i>           | A_64_P160096 | 4.360E-02 | 2.366 |
| <i>Gabrq</i>          | A_64_P105775 | 2.831E-03 | 2.367 |
| <i>Abcg1</i>          | A_44_P237994 | 2.383E-02 | 2.367 |
| <i>Myrf1</i>          | A_64_P155810 | 3.097E-02 | 2.371 |
| <i>Neurod6</i>        | A_64_P133152 | 1.960E-03 | 2.371 |
| <i>Hspb6</i>          | A_44_P996410 | 1.146E-03 | 2.371 |
| <i>Lfn5</i>           | A_44_P553341 | 1.482E-03 | 2.378 |
| <i>Hook1</i>          | A_44_P963558 | 5.877E-03 | 2.390 |
| <i>Kif18b</i>         | A_42_P523070 | 4.304E-02 | 2.390 |
| <i>Ppp2r1a</i>        | A_44_P427523 | 5.005E-03 | 2.390 |
| <i>Znfx1</i>          | A_44_P928367 | 1.511E-02 | 2.402 |
| <i>Mta2</i>           | A_64_P157425 | 2.525E-03 | 2.402 |
| <i>LOC100909966</i>   | A_44_P445136 | 6.169E-03 | 2.405 |
| <i>Olr13</i>          | A_44_P445136 | 6.169E-03 | 2.405 |
| <i>Lrg1</i>           | A_64_P028205 | 1.001E-02 | 2.406 |
| <i>AABR07051260.1</i> | A_64_P128355 | 4.847E-02 | 2.410 |
| <i>Otof</i>           | A_64_P064048 | 4.460E-04 | 2.415 |
| <i>Fam220a</i>        | A_44_P858398 | 6.125E-03 | 2.420 |
| <i>Zdhhc23</i>        | A_44_P456599 | 1.258E-02 | 2.423 |
| <i>Plppr2</i>         | A_64_P017093 | 2.460E-04 | 2.429 |
| <i>Clmn</i>           | A_44_P129262 | 3.219E-03 | 2.430 |
| <i>Gprin3</i>         | A_64_P152919 | 4.862E-03 | 2.463 |
| <i>Plcxd2</i>         | A_44_P215917 | 1.572E-03 | 2.464 |
| <i>Scube2</i>         | A_64_P015305 | 3.255E-03 | 2.466 |
| <i>Olfm2</i>          | A_44_P532417 | 1.550E-04 | 2.469 |
| <i>Gdf10</i>          | A_42_P584734 | 2.629E-02 | 2.477 |
| <i>Rtn4r</i>          | A_64_P152214 | 3.170E-04 | 2.492 |
| <i>Zcchc16</i>        | A_64_P085946 | 1.694E-02 | 2.492 |
| <i>Cabp7</i>          | A_64_P142912 | 8.391E-03 | 2.493 |
| <i>Kcng2</i>          | A_64_P097385 | 8.134E-03 | 2.494 |
| <i>ldh3a</i>          | A_64_P013491 | 1.095E-03 | 2.496 |
| <i>Dmbx1</i>          | A_64_P036685 | 5.795E-03 | 2.509 |

|                       |              |           |       |
|-----------------------|--------------|-----------|-------|
| <i>Dhcr7</i>          | A_44_P512136 | 1.339E-03 | 2.511 |
| <i>Zfp263</i>         | A_44_P154721 | 3.721E-03 | 2.513 |
| <i>Acpt</i>           | A_44_P470868 | 1.681E-02 | 2.516 |
| <i>Ubqlnl</i>         | A_44_P278842 | 2.820E-04 | 2.528 |
| <i>Olr1392</i>        | A_64_P150575 | 2.266E-02 | 2.546 |
| <i>Slc24a2</i>        | A_64_P078644 | 7.349E-03 | 2.549 |
| <i>Ptk2b</i>          | A_44_P482346 | 3.029E-03 | 2.551 |
| <i>Lrrtm2</i>         | A_44_P698466 | 4.064E-03 | 2.558 |
| <i>Six4</i>           | A_44_P807861 | 4.045E-02 | 2.562 |
| <i>Cyp2e1</i>         | A_44_P409232 | 3.672E-02 | 2.563 |
| <i>Ppp1r1b</i>        | A_64_P005228 | 4.220E-04 | 2.595 |
| <i>Upk2</i>           | A_64_P016107 | 2.140E-04 | 2.602 |
| <i>Sh3gl1</i>         | A_42_P649762 | 2.730E-04 | 2.604 |
| <i>LOC683422</i>      | A_64_P121489 | 6.440E-04 | 2.607 |
| <i>Prkcg</i>          | A_42_P774448 | 5.542E-03 | 2.608 |
| <i>Pex5l</i>          | A_44_P125710 | 3.434E-03 | 2.609 |
| <i>Cntnap1</i>        | A_44_P377156 | 1.988E-02 | 2.610 |
| <i>LOC100909524</i>   | A_64_P083369 | 5.670E-04 | 2.612 |
| <i>Serpina10</i>      | A_64_P083369 | 5.670E-04 | 2.612 |
| <i>Apob</i>           | A_64_P051875 | 3.894E-03 | 2.620 |
| <i>Wnt4</i>           | A_42_P559414 | 2.250E-04 | 2.629 |
| <i>RGD1307947</i>     | A_44_P325175 | 3.859E-02 | 2.640 |
| <i>Olr1386</i>        | A_44_P358323 | 1.283E-02 | 2.653 |
| <i>Ckap4</i>          | A_42_P827204 | 9.050E-04 | 2.657 |
| <i>Rph3al</i>         | A_42_P486964 | 1.468E-03 | 2.661 |
| <i>Tacr2</i>          | A_43_P13083  | 2.751E-02 | 2.671 |
| <i>AABR07006030.1</i> | A_64_P018633 | 2.660E-02 | 2.675 |
| <i>Olr373</i>         | A_44_P407270 | 3.468E-02 | 2.693 |
| <i>Anlnl1</i>         | A_44_P178108 | 1.090E-03 | 2.693 |
| <i>Mpzl1</i>          | A_44_P521699 | 2.125E-02 | 2.698 |
| <i>Tp53</i>           | A_64_P113635 | 2.751E-03 | 2.699 |
| <i>Cln3</i>           | A_64_P048868 | 6.593E-03 | 2.705 |
| <i>Runx2</i>          | A_64_P102977 | 4.826E-02 | 2.708 |
| <i>Gprin1</i>         | A_64_P082584 | 1.135E-02 | 2.709 |
| <i>Nrros</i>          | A_44_P487910 | 4.645E-03 | 2.715 |
| <i>Opr1</i>           | A_44_P408520 | 1.456E-03 | 2.716 |
| <i>Loxhd1</i>         | A_64_P000505 | 2.872E-02 | 2.726 |
| <i>Klk1c3</i>         | A_44_P374824 | 7.468E-03 | 2.779 |
| <i>LOC108348116</i>   | A_44_P374824 | 7.468E-03 | 2.779 |
| <i>Fer1l4</i>         | A_64_P057227 | 2.525E-03 | 2.786 |
| <i>Apc2</i>           | A_42_P464668 | 1.202E-03 | 2.795 |
| <i>Hmcn2</i>          | A_64_P101908 | 1.028E-02 | 2.796 |
| <i>Olr1378</i>        | A_44_P438034 | 4.012E-02 | 2.797 |
| <i>Hist1h1t</i>       | A_44_P348812 | 2.758E-03 | 2.803 |

|                       |              |           |       |
|-----------------------|--------------|-----------|-------|
| <i>Aacs</i>           | A_42_P589190 | 5.629E-03 | 2.804 |
| <i>Eef1a2</i>         | A_64_P099392 | 2.251E-03 | 2.819 |
| <i>Prss22</i>         | A_64_P155311 | 4.424E-02 | 2.864 |
| <i>Plcxd2</i>         | A_44_P829145 | 1.903E-02 | 2.881 |
| <i>Cd55</i>           | A_64_P127808 | 3.871E-02 | 2.954 |
| <i>Loxhd1</i>         | A_64_P015104 | 1.340E-03 | 2.963 |
| <i>Olr374</i>         | A_64_P156203 | 4.489E-02 | 2.974 |
| <i>Slc3a1</i>         | A_64_P074875 | 2.255E-02 | 3.013 |
| <i>Clec1a</i>         | A_64_P141175 | 9.480E-04 | 3.014 |
| <i>Htr5b</i>          | A_43_P16232  | 2.430E-04 | 3.017 |
| <i>Olr1353</i>        | A_44_P351252 | 2.064E-02 | 3.070 |
| <i>Pik3ip1</i>        | A_64_P019280 | 1.156E-02 | 3.074 |
| <i>Csmd1</i>          | A_64_P019350 | 2.557E-02 | 3.085 |
| <i>Nos1</i>           | A_44_P473047 | 1.010E-04 | 3.092 |
| <i>Adra2c</i>         | A_64_P054441 | 7.040E-04 | 3.111 |
| <i>LOC103694864</i>   | A_44_P539359 | 5.029E-03 | 3.118 |
| <i>Mmp28</i>          | A_44_P539359 | 5.029E-03 | 3.118 |
| <i>Pde11a</i>         | A_64_P013516 | 3.996E-03 | 3.124 |
| <i>Abcc9</i>          | A_44_P455479 | 7.350E-03 | 3.133 |
| <i>Slco6c1</i>        | A_44_P332483 | 6.925E-03 | 3.156 |
| <i>AABR07066648.1</i> | A_64_P074795 | 4.127E-02 | 3.182 |
| <i>Chrd</i>           | A_44_P345319 | 1.134E-02 | 3.188 |
| <i>Tgfb3</i>          | A_44_P125025 | 3.170E-04 | 3.222 |
| <i>Cd55</i>           | A_44_P168159 | 1.490E-02 | 3.226 |
| <i>Defa9</i>          | A_64_P131577 | 2.225E-02 | 3.233 |
| <i>LOC680273</i>      | A_64_P064919 | 8.156E-03 | 3.303 |
| <i>Uncx</i>           | A_64_P058615 | 4.041E-02 | 3.320 |
| <i>Chst9</i>          | A_64_P062665 | 1.972E-03 | 3.321 |
| <i>Prkce</i>          | A_64_P019628 | 1.290E-04 | 3.346 |
| <i>Btnl5</i>          | A_64_P165267 | 3.690E-02 | 3.390 |
| <i>Krt27</i>          | A_64_P096398 | 1.034E-02 | 3.401 |
| <i>Zfp385b</i>        | A_64_P144899 | 1.489E-02 | 3.462 |
| <i>Cntn2</i>          | A_44_P434271 | 2.193E-03 | 3.551 |
| <i>Neurod2</i>        | A_44_P458901 | 1.970E-04 | 3.599 |
| <i>NEWGENE_735020</i> | A_44_P524630 | 3.863E-03 | 3.684 |
| <i>Qrfp</i>           | A_44_P524630 | 3.863E-03 | 3.684 |
| <i>Mptx1</i>          | A_44_P503528 | 4.533E-03 | 3.786 |
| <i>Cidec</i>          | A_44_P714007 | 2.124E-03 | 3.788 |
| <i>Htr1a</i>          | A_64_P052031 | 3.690E-04 | 3.808 |
| <i>Ca5a</i>           | A_42_P671800 | 2.692E-02 | 3.809 |
| <i>LOC680273</i>      | A_64_P102868 | 3.089E-03 | 3.900 |
| <i>Gpr165</i>         | A_64_P072513 | 2.726E-02 | 4.291 |
| <i>Pik3c2b</i>        | A_64_P249046 | 1.100E-02 | 4.326 |
| <i>Tmem102</i>        | A_44_P836742 | 7.601E-03 | 4.394 |

|                       |               |           |        |
|-----------------------|---------------|-----------|--------|
| <i>Tlx3</i>           | A_64_P135643  | 5.933E-03 | 4.470  |
| <i>Uts2r</i>          | A_43_P12073   | 5.985E-03 | 4.679  |
| <i>Sfmbt2</i>         | A_64_P138189  | 1.741E-02 | 4.745  |
| <i>AABR07031963.1</i> | A_64_P081892  | 4.804E-02 | 4.767  |
| <i>Itpkb</i>          | A_64_P104548  | 1.837E-03 | 4.841  |
| <i>Farp1</i>          | A_44_P257832  | 1.036E-03 | 4.872  |
| <i>Prob1</i>          | A_64_P152558  | 3.004E-03 | 5.020  |
| <i>Wdr76</i>          | A_64_P035704  | 3.554E-03 | 5.036  |
| <i>Tmem215</i>        | A_64_P113758  | 1.402E-02 | 5.085  |
| <i>Fam163b</i>        | A_64_P115980  | 1.320E-04 | 5.086  |
| <i>Gpr139</i>         | A_64_P098818  | 1.595E-03 | 5.783  |
| <i>Ooep</i>           | A_64_P081939  | 2.238E-02 | 5.812  |
| <i>Cpa6</i>           | A_44_P372998  | 3.820E-04 | 6.171  |
| <i>Mamstr</i>         | A_64_P021713  | 5.847E-03 | 6.298  |
| <i>LOC500712</i>      | A_44_P1070940 | 4.997E-03 | 7.448  |
| <i>RGD1308878</i>     | A_44_P513698  | 2.489E-02 | 7.559  |
| <i>Cdk15</i>          | A_64_P031895  | 7.050E-04 | 9.475  |
| <i>Alx4</i>           | A_64_P116819  | 3.467E-02 | 9.857  |
| <i>Hist1h2ail2</i>    | A_64_P035022  | 3.693E-02 | 10.275 |
| <i>Lym1</i>           | A_64_P104870  | 1.802E-03 | 12.823 |
| <i>Klf12</i>          | A_64_P080169  | 1.200E-03 | 16.070 |
| <i>RGD1305298</i>     | A_44_P161723  | 4.580E-04 | 17.207 |
| <i>Slx1b</i>          | A_64_P114700  | 8.290E-04 | 21.890 |

**Table S2. Regulated transcripts upon 26h of GYKI-52466 and MK-801 treatment in hippocampal neurons.**

| Synaptic activity blockade 26h |               |                  |             |
|--------------------------------|---------------|------------------|-------------|
| Gene symbol                    | Agilent ID    | Adjusted p value | Fold Change |
| <i>Npas4</i>                   | A_64_P064531  | 9.330E-05        | 0.011       |
| <i>Slx1b</i>                   | A_64_P114700  | 2.596E-04        | 0.041       |
| <i>RGD1305298</i>              | A_44_P161723  | 1.708E-05        | 0.045       |
| <i>Hist1h2ail2</i>             | A_64_P035022  | 2.429E-03        | 0.050       |
| <i>Agbl1</i>                   | A_64_P053169  | 2.358E-05        | 0.059       |
| <i>Klf12</i>                   | A_64_P080169  | 4.501E-04        | 0.066       |
| <i>Nr4a1</i>                   | A_42_P682589  | 7.741E-04        | 0.067       |
| <i>Alx4</i>                    | A_64_P116819  | 3.459E-03        | 0.073       |
| <i>Arc</i>                     | A_44_P118724  | 7.401E-05        | 0.075       |
| <i>Nmbr</i>                    | A_64_P096209  | 9.013E-04        | 0.078       |
| <i>Bdnf</i>                    | A_44_P437896  | 9.314E-05        | 0.097       |
| <i>AABR07025284.1</i>          | A_44_P762053  | 4.994E-03        | 0.100       |
| <i>Palld</i>                   | A_44_P762053  | 4.994E-03        | 0.100       |
| <i>Cyp26b1</i>                 | A_42_P693964  | 1.281E-03        | 0.102       |
| <i>Nfil3</i>                   | A_44_P201028  | 2.595E-04        | 0.109       |
| <i>Perm1</i>                   | A_64_P121796  | 4.143E-03        | 0.113       |
| <i>Mepe</i>                    | A_64_P164198  | 4.494E-04        | 0.116       |
| <i>Nr4a2</i>                   | A_64_P154952  | 1.418E-03        | 0.117       |
| <i>RGD1308878</i>              | A_44_P513698  | 1.358E-02        | 0.117       |
| <i>Cdk15</i>                   | A_64_P031895  | 5.514E-04        | 0.118       |
| <i>Tll1</i>                    | A_44_P323700  | 3.089E-05        | 0.121       |
| <i>Gprc5a</i>                  | A_64_P142625  | 3.607E-03        | 0.129       |
| <i>Mamstr</i>                  | A_64_P021713  | 1.282E-03        | 0.133       |
| <i>Lymr1</i>                   | A_64_P104870  | 1.902E-02        | 0.136       |
| <i>Mepe</i>                    | A_64_P027449  | 2.090E-04        | 0.136       |
| <i>Hpse</i>                    | A_43_P12258   | 9.427E-04        | 0.139       |
| <i>Tmprss11d</i>               | A_64_P032323  | 4.705E-03        | 0.140       |
| <i>Nps</i>                     | A_64_P057360  | 1.042E-04        | 0.141       |
| <i>Fam150b</i>                 | A_64_P048055  | 7.603E-03        | 0.141       |
| <i>Inhba</i>                   | A_64_P030654  | 8.385E-04        | 0.148       |
| <i>LOC500712</i>               | A_44_P1070940 | 1.378E-02        | 0.155       |
| <i>Crh</i>                     | A_43_P12478   | 1.409E-04        | 0.155       |
| <i>Rgs4</i>                    | A_42_P743580  | 1.410E-04        | 0.156       |
| <i>Nr4a2</i>                   | A_43_P12023   | 5.490E-03        | 0.156       |
| <i>Cldn20</i>                  | A_64_P163424  | 1.685E-02        | 0.161       |
| <i>Tp63</i>                    | A_43_P15281   | 9.118E-04        | 0.167       |



|                       |              |           |       |
|-----------------------|--------------|-----------|-------|
| <i>Serpib2</i>        | A_44_P104985 | 1.479E-03 | 0.169 |
| <i>Blnk</i>           | A_44_P144741 | 9.130E-03 | 0.177 |
| <i>Trpc6</i>          | A_64_P064621 | 2.877E-04 | 0.180 |
| <i>Car7</i>           | A_64_P021845 | 2.808E-04 | 0.183 |
| <i>Olr1697</i>        | A_64_P027967 | 6.213E-03 | 0.184 |
| <i>Prob1</i>          | A_64_P152558 | 1.739E-03 | 0.187 |
| <i>Ca5a</i>           | A_42_P671800 | 1.210E-02 | 0.188 |
| <i>Fam150b</i>        | A_64_P119680 | 2.159E-02 | 0.189 |
| <i>LOC297568</i>      | A_44_P301817 | 2.059E-03 | 0.189 |
| <i>Ooep</i>           | A_64_P081939 | 2.966E-02 | 0.189 |
| <i>Adcyap1</i>        | A_44_P522701 | 6.866E-04 | 0.190 |
| <i>Pthlh</i>          | A_43_P15246  | 1.504E-03 | 0.192 |
| <i>Anxa10</i>         | A_44_P265003 | 2.016E-03 | 0.197 |
| <i>Sfmbt2</i>         | A_64_P138189 | 1.917E-03 | 0.198 |
| <i>F2rl2</i>          | A_44_P306344 | 2.980E-03 | 0.201 |
| <i>LOC500300</i>      | A_44_P899127 | 9.476E-03 | 0.202 |
| <i>Ptgs2</i>          | A_64_P129316 | 6.221E-04 | 0.203 |
| <i>Dusp1</i>          | A_43_P12927  | 6.822E-04 | 0.212 |
| <i>Olr1378</i>        | A_44_P438034 | 1.795E-02 | 0.213 |
| <i>Crh</i>            | A_64_P116972 | 2.657E-04 | 0.217 |
| <i>Fam163b</i>        | A_64_P115980 | 7.134E-05 | 0.218 |
| <i>Hoxb3</i>          | A_44_P459845 | 3.804E-02 | 0.221 |
| <i>Uts2r</i>          | A_43_P12073  | 7.230E-03 | 0.221 |
| <i>Itpkb</i>          | A_64_P104548 | 1.455E-04 | 0.223 |
| <i>Rd3l</i>           | A_64_P004007 | 1.244E-02 | 0.225 |
| <i>Reg3a</i>          | A_42_P661600 | 5.404E-03 | 0.226 |
| <i>Fos</i>            | A_64_P131051 | 2.330E-03 | 0.228 |
| <i>Wdr76</i>          | A_64_P035704 | 2.531E-04 | 0.230 |
| <i>Pdyn</i>           | A_44_P476915 | 4.863E-02 | 0.230 |
| <i>LOC680663</i>      | A_64_P060224 | 4.870E-03 | 0.230 |
| <i>Rgs2</i>           | A_64_P002156 | 9.390E-04 | 0.234 |
| <i>Amigo2</i>         | A_44_P243004 | 7.363E-03 | 0.234 |
| <i>Lmod3</i>          | A_64_P103610 | 1.349E-03 | 0.236 |
| <i>Farp1</i>          | A_44_P257832 | 4.819E-04 | 0.237 |
| <i>Egr4</i>           | A_42_P708068 | 4.909E-03 | 0.239 |
| <i>Tlx3</i>           | A_64_P135643 | 4.663E-03 | 0.242 |
| <i>Cpb1</i>           | A_43_P11449  | 4.129E-02 | 0.245 |
| <i>Cnmd</i>           | A_42_P631818 | 4.920E-03 | 0.245 |
| <i>S1pr5</i>          | A_64_P048506 | 4.454E-02 | 0.245 |
| <i>Arl4d</i>          | A_64_P069261 | 2.876E-04 | 0.248 |
| <i>Gpr165</i>         | A_64_P072513 | 1.791E-02 | 0.254 |
| <i>Tph2</i>           | A_44_P311178 | 2.869E-04 | 0.256 |
| <i>Pik3c2b</i>        | A_64_P249046 | 7.168E-03 | 0.265 |
| <i>AABR07066648.1</i> | A_64_P074795 | 1.284E-02 | 0.266 |
| <i>Rasgrp1</i>        | A_43_P11980  | 5.964E-03 | 0.269 |

|                       |              |           |       |
|-----------------------|--------------|-----------|-------|
| <i>Amigo2</i>         | A_64_P078140 | 1.541E-03 | 0.270 |
| <i>AABR07051260.1</i> | A_64_P128355 | 1.378E-02 | 0.271 |
| <i>AABR07024139.1</i> | A_64_P041219 | 1.833E-03 | 0.272 |
| <i>Pcsk1</i>          | A_64_P041219 | 1.833E-03 | 0.272 |
| <i>Zfp263</i>         | A_44_P154721 | 1.483E-03 | 0.273 |
| <i>Gpat3</i>          | A_42_P765736 | 5.776E-03 | 0.281 |
| <i>Enthd1</i>         | A_64_P023694 | 5.320E-03 | 0.282 |
| <i>Egr1</i>           | A_64_P082693 | 2.714E-04 | 0.283 |
| <i>Il13ra2</i>        | A_64_P109028 | 4.264E-03 | 0.283 |
| <i>Dct</i>            | A_64_P153447 | 3.848E-02 | 0.283 |
| <i>Arpp21</i>         | A_64_P047168 | 4.507E-03 | 0.284 |
| <i>Adgrf5</i>         | A_44_P992535 | 1.959E-03 | 0.285 |
| <i>Chst8</i>          | A_64_P062670 | 7.754E-04 | 0.286 |
| <i>Rgs2</i>           | A_43_P14131  | 6.486E-04 | 0.287 |
| <i>Esr1</i>           | A_44_P401615 | 3.589E-03 | 0.287 |
| <i>Spesp1</i>         | A_64_P015395 | 2.026E-02 | 0.291 |
| <i>Csrnp1</i>         | A_44_P431774 | 1.929E-03 | 0.291 |
| <i>Pi15</i>           | A_64_P153916 | 6.393E-03 | 0.292 |
| <i>LOC102547011</i>   | A_64_P116013 | 9.149E-03 | 0.293 |
| <i>Tmco5a</i>         | A_64_P052697 | 6.098E-05 | 0.293 |
| <i>LOC299277</i>      | A_64_P136193 | 4.796E-04 | 0.294 |
| <i>Neb</i>            | A_64_P112185 | 3.120E-03 | 0.294 |
| <i>LOC680663</i>      | A_64_P028768 | 2.384E-03 | 0.300 |
| <i>Asb5</i>           | A_42_P503626 | 1.352E-04 | 0.305 |
| <i>Sele</i>           | A_44_P291264 | 1.697E-02 | 0.311 |
| <i>Ppef1</i>          | A_44_P419710 | 7.230E-04 | 0.312 |
| <i>Sgk1</i>           | A_44_P313542 | 3.984E-04 | 0.312 |
| <i>Unc13b</i>         | A_64_P036011 | 8.513E-03 | 0.313 |
| <i>Tac1</i>           | A_64_P009999 | 4.933E-02 | 0.314 |
| <i>Cubn</i>           | A_44_P405130 | 5.819E-03 | 0.319 |
| <i>Gsap</i>           | A_44_P337843 | 4.042E-02 | 0.319 |
| <i>Nox1</i>           | A_64_P091732 | 4.391E-04 | 0.320 |
| <i>Pcdh8</i>          | A_44_P467202 | 3.579E-03 | 0.321 |
| <i>Otud1</i>          | A_44_P638191 | 6.180E-03 | 0.322 |
| <i>RGD1306484</i>     | A_44_P356829 | 1.396E-04 | 0.325 |
| <i>Kif14</i>          | A_44_P768777 | 1.806E-03 | 0.325 |
| <i>Cyp11b1</i>        | A_44_P151638 | 2.297E-02 | 0.327 |
| <i>Stc2</i>           | A_44_P122252 | 4.699E-04 | 0.328 |
| <i>Hs3st1</i>         | A_44_P118666 | 3.496E-04 | 0.328 |
| <i>Rasl11a</i>        | A_44_P320752 | 3.887E-03 | 0.328 |
| <i>Ifi203-ps1</i>     | A_44_P161332 | 4.220E-02 | 0.329 |
| <i>Kif18b</i>         | A_42_P523070 | 9.005E-03 | 0.329 |
| <i>lbsp</i>           | A_44_P255216 | 2.201E-02 | 0.330 |
| <i>Mlxip</i>          | A_64_P034014 | 7.892E-03 | 0.331 |
| <i>Tll1</i>           | A_64_P105565 | 6.374E-05 | 0.332 |

|                       |               |           |       |
|-----------------------|---------------|-----------|-------|
| <i>Col22a1</i>        | A_44_P1037456 | 4.424E-03 | 0.333 |
| <i>March11</i>        | A_64_P073550  | 2.177E-04 | 0.336 |
| <i>Uox</i>            | A_44_P392482  | 1.274E-02 | 0.336 |
| <i>Kcns3</i>          | A_44_P416938  | 1.471E-02 | 0.337 |
| <i>Fgf8</i>           | A_44_P219639  | 2.436E-02 | 0.337 |
| <i>Rasl11b</i>        | A_42_P540972  | 1.444E-03 | 0.339 |
| <i>Mmp10</i>          | A_44_P404861  | 1.507E-03 | 0.339 |
| <i>Xkrx</i>           | A_64_P074775  | 3.740E-04 | 0.340 |
| <i>Cckbr</i>          | A_64_P101130  | 1.699E-04 | 0.341 |
| <i>Pdha2</i>          | A_44_P402797  | 2.765E-03 | 0.342 |
| <i>Syt10</i>          | A_44_P379342  | 1.472E-02 | 0.344 |
| <i>Dnmt3b</i>         | A_64_P082814  | 4.631E-02 | 0.345 |
| <i>Gabrd</i>          | A_43_P11897   | 2.411E-03 | 0.347 |
| <i>Nptx2</i>          | A_64_P049808  | 5.788E-03 | 0.347 |
| <i>Vom1r38</i>        | A_64_P139500  | 1.215E-03 | 0.348 |
| <i>Sstr1</i>          | A_64_P090866  | 1.228E-02 | 0.348 |
| <i>Slc5a4b</i>        | A_64_P122050  | 3.857E-02 | 0.349 |
| <i>Ankrd33b</i>       | A_44_P421887  | 1.437E-04 | 0.351 |
| <i>Pdlim1</i>         | A_42_P802550  | 3.855E-04 | 0.352 |
| <i>Esr2</i>           | A_64_P049530  | 2.493E-02 | 0.352 |
| <i>Slc2a2</i>         | A_64_P011959  | 3.416E-02 | 0.353 |
| <i>Lcn5</i>           | A_64_P130324  | 2.450E-02 | 0.353 |
| <i>Ptger3</i>         | A_64_P063398  | 6.266E-04 | 0.353 |
| <i>Kcnj4</i>          | A_44_P252491  | 1.389E-04 | 0.354 |
| <i>Sh3gl1</i>         | A_42_P649762  | 2.350E-03 | 0.357 |
| <i>Pam</i>            | A_64_P058452  | 1.084E-02 | 0.357 |
| <i>Adamdec1</i>       | A_64_P063239  | 3.998E-03 | 0.357 |
| <i>Acss3</i>          | A_64_P118922  | 4.390E-02 | 0.357 |
| <i>RGD1562378</i>     | A_64_P063035  | 4.688E-03 | 0.359 |
| <i>Olr1694</i>        | A_64_P040895  | 2.205E-02 | 0.360 |
| <i>Junb</i>           | A_64_P029805  | 9.981E-03 | 0.368 |
| <i>Mmp9</i>           | A_44_P501112  | 5.762E-03 | 0.369 |
| <i>Cd164l2</i>        | A_64_P049466  | 4.031E-03 | 0.369 |
| <i>Sik1</i>           | A_64_P147674  | 1.610E-03 | 0.370 |
| <i>Igsf9b</i>         | A_64_P133587  | 2.701E-03 | 0.371 |
| <i>Cftr</i>           | A_64_P103537  | 3.588E-02 | 0.373 |
| <i>LOC290508</i>      | A_44_P156774  | 2.071E-02 | 0.373 |
| <i>Rn60_20_0038.1</i> | A_64_P154337  | 1.493E-02 | 0.375 |
| <i>Olr1386</i>        | A_44_P358323  | 2.743E-03 | 0.377 |
| <i>Cflar</i>          | A_64_P109610  | 4.193E-03 | 0.378 |
| <i>Hsf2bp</i>         | A_64_P144547  | 1.096E-02 | 0.379 |
| <i>Samsn1</i>         | A_44_P461165  | 1.130E-02 | 0.379 |
| <i>RGD1560925</i>     | A_64_P037517  | 2.741E-03 | 0.381 |
| <i>Trib1</i>          | A_44_P1016829 | 2.479E-02 | 0.383 |
| <i>Klf2</i>           | A_44_P472661  | 1.807E-02 | 0.383 |

|                     |               |           |       |
|---------------------|---------------|-----------|-------|
| <i>Plagl1</i>       | A_43_P15235   | 3.436E-02 | 0.383 |
| <i>Sik1</i>         | A_44_P424723  | 7.357E-03 | 0.384 |
| <i>Gch1</i>         | A_64_P138216  | 2.687E-03 | 0.385 |
| <i>Fbxo33</i>       | A_44_P451392  | 7.071E-04 | 0.386 |
| <i>Fcer1g</i>       | A_44_P1053404 | 7.580E-03 | 0.386 |
| <i>Cckbr</i>        | A_64_P013932  | 4.307E-03 | 0.387 |
| <i>LOC100365525</i> | A_64_P074445  | 1.020E-03 | 0.388 |
| <i>Lrrc39</i>       | A_64_P006220  | 4.786E-02 | 0.389 |
| <i>Cpne8</i>        | A_42_P630572  | 1.182E-02 | 0.390 |
| <i>Mlip</i>         | A_64_P127789  | 1.062E-04 | 0.390 |
| <i>Zfp385a</i>      | A_42_P751742  | 4.324E-02 | 0.391 |
| <i>Tmem100</i>      | A_44_P221077  | 2.880E-02 | 0.391 |
| <i>Maats1</i>       | A_43_P20984   | 2.223E-02 | 0.391 |
| <i>Cfap43</i>       | A_64_P160082  | 1.659E-02 | 0.391 |
| <i>Dok5</i>         | A_64_P077345  | 2.936E-03 | 0.391 |
| <i>Emp1</i>         | A_44_P807058  | 1.693E-02 | 0.392 |
| <i>Zfp385b</i>      | A_64_P144899  | 7.850E-03 | 0.392 |
| <i>Cpne8</i>        | A_64_P154218  | 1.503E-02 | 0.394 |
| <i>Olr63</i>        | A_64_P111644  | 1.379E-03 | 0.394 |
| <i>Synj2</i>        | A_42_P753215  | 1.894E-02 | 0.395 |
| <i>Emg1</i>         | A_64_P115306  | 3.788E-04 | 0.400 |
| <i>Plk3</i>         | A_44_P135224  | 9.042E-06 | 0.400 |
| <i>Lgi1</i>         | A_44_P262122  | 1.269E-03 | 0.404 |
| <i>H2afx</i>        | A_44_P988451  | 4.476E-03 | 0.406 |
| <i>Amy2a3</i>       | A_64_P058472  | 3.307E-02 | 0.407 |
| <i>Kcna1</i>        | A_44_P231457  | 5.579E-04 | 0.408 |
| <i>RGD1560350</i>   | A_64_P034342  | 4.471E-02 | 0.408 |
| <i>Kcna4</i>        | A_44_P224020  | 7.596E-03 | 0.413 |
| <i>Sntn</i>         | A_64_P082853  | 2.588E-03 | 0.415 |
| <i>Tmc4</i>         | A_44_P1020780 | 4.188E-02 | 0.416 |
| <i>Ptger3</i>       | A_64_P150603  | 2.581E-03 | 0.417 |
| <i>Tspan9</i>       | A_42_P655897  | 1.329E-03 | 0.423 |
| <i>Dlgap3</i>       | A_64_P072054  | 3.974E-04 | 0.423 |
| <i>Snrpa</i>        | A_42_P641234  | 3.979E-04 | 0.424 |
| <i>Fras1</i>        | A_64_P041270  | 1.154E-02 | 0.424 |
| <i>Mmp17</i>        | A_64_P111898  | 3.515E-04 | 0.425 |
| <i>Rcvrn</i>        | A_64_P134341  | 4.354E-03 | 0.426 |
| <i>Fam46a</i>       | A_44_P1048380 | 9.655E-03 | 0.427 |
| <i>Bco1</i>         | A_44_P222122  | 2.246E-02 | 0.430 |
| <i>Fndc8</i>        | A_44_P267778  | 8.778E-03 | 0.434 |
| <i>AC131483.1</i>   | A_44_P526866  | 4.055E-02 | 0.435 |
| <i>Klf5</i>         | A_44_P526866  | 4.055E-02 | 0.435 |
| <i>Olr305</i>       | A_64_P008468  | 4.200E-02 | 0.437 |
| <i>Klhl41</i>       | A_44_P116283  | 4.026E-02 | 0.439 |
| <i>Aloxe3</i>       | A_64_P019931  | 4.231E-03 | 0.440 |

|                       |               |           |       |
|-----------------------|---------------|-----------|-------|
| <i>Pcsk4</i>          | A_42_P506956  | 1.394E-03 | 0.441 |
| <i>Rara</i>           | A_64_P022943  | 8.232E-04 | 0.442 |
| <i>Man1a1</i>         | A_64_P029297  | 9.648E-03 | 0.442 |
| <i>Stac3</i>          | A_44_P1045734 | 9.436E-03 | 0.442 |
| <i>Lzts1</i>          | A_44_P1059903 | 1.338E-03 | 0.443 |
| <i>Rbpjl</i>          | A_64_P124234  | 2.423E-02 | 0.445 |
| <i>Si</i>             | A_64_P123216  | 2.292E-02 | 0.445 |
| <i>Kcnh7</i>          | A_64_P005907  | 3.971E-03 | 0.446 |
| <i>Dmbt1</i>          | A_64_P237865  | 9.503E-03 | 0.447 |
| <i>Zdbf2</i>          | A_64_P016681  | 1.682E-03 | 0.447 |
| <i>Caps2</i>          | A_44_P286400  | 1.525E-03 | 0.448 |
| <i>Kcnj3</i>          | A_44_P452282  | 2.222E-03 | 0.449 |
| <i>Ctrb1</i>          | A_43_P11451   | 2.081E-03 | 0.452 |
| <i>Hsd3b2</i>         | A_64_P006423  | 1.545E-05 | 0.453 |
| <i>Hsd3b5</i>         | A_64_P006423  | 1.545E-05 | 0.453 |
| <i>Map3k5</i>         | A_64_P129293  | 2.868E-03 | 0.455 |
| <i>Ckap4</i>          | A_42_P827204  | 2.683E-03 | 0.455 |
| <i>Erg</i>            | A_64_P095972  | 4.540E-02 | 0.456 |
| <i>Sorcs3</i>         | A_64_P161640  | 8.593E-03 | 0.457 |
| <i>Mctp2</i>          | A_64_P086874  | 3.850E-02 | 0.457 |
| <i>Nr4a3</i>          | A_43_P11932   | 9.591E-03 | 0.458 |
| <i>Has2</i>           | A_64_P158903  | 1.838E-02 | 0.460 |
| <i>Mustn1</i>         | A_64_P032358  | 3.109E-03 | 0.461 |
| <i>LOC103693222</i>   | A_64_P088635  | 2.672E-04 | 0.462 |
| <i>Lyg2</i>           | A_64_P088635  | 2.672E-04 | 0.462 |
| <i>Nsun7</i>          | A_64_P071943  | 1.403E-02 | 0.463 |
| <i>Sel1l2</i>         | A_44_P267454  | 2.685E-02 | 0.464 |
| <i>Slc25a42</i>       | A_44_P269666  | 1.440E-03 | 0.464 |
| <i>Prmt8</i>          | A_64_P047616  | 3.341E-06 | 0.464 |
| <i>Slc7a5</i>         | A_44_P380575  | 1.242E-02 | 0.465 |
| <i>Tchh</i>           | A_64_P008177  | 2.519E-02 | 0.465 |
| <i>AABR07065113.1</i> | A_64_P058503  | 8.997E-04 | 0.465 |
| <i>Hpse</i>           | A_64_P089400  | 4.379E-03 | 0.466 |
| <i>Map3k9</i>         | A_64_P080887  | 2.510E-03 | 0.466 |
| <i>Pfn1</i>           | A_44_P132470  | 1.602E-02 | 0.467 |
| <i>Fpr2</i>           | A_64_P010832  | 2.631E-02 | 0.467 |
| <i>AABR07029863.4</i> | A_64_P157984  | 2.783E-03 | 0.467 |
| <i>Adamts1</i>        | A_44_P596424  | 3.501E-02 | 0.468 |
| <i>Cln3</i>           | A_64_P048868  | 7.053E-03 | 0.468 |
| <i>Hapln1</i>         | A_64_P069729  | 4.835E-02 | 0.469 |
| <i>Crem</i>           | A_43_P11922   | 9.767E-03 | 0.470 |
| <i>Sf3a2</i>          | A_64_P158589  | 1.021E-03 | 0.470 |
| <i>Mustn1</i>         | A_42_P808945  | 1.079E-02 | 0.472 |
| <i>Bves</i>           | A_44_P352331  | 1.587E-02 | 0.472 |
| <i>Slc25a32</i>       | A_44_P201796  | 9.506E-04 | 0.473 |

|                     |               |           |       |
|---------------------|---------------|-----------|-------|
| <i>Lmo2</i>         | A_44_P459492  | 5.782E-04 | 0.473 |
| <i>Trhde</i>        | A_44_P556556  | 4.214E-02 | 0.475 |
| <i>Gsto2</i>        | A_44_P252976  | 7.025E-04 | 0.475 |
| <i>LOC103690044</i> | A_44_P252976  | 7.025E-04 | 0.475 |
| <i>Wdr63</i>        | A_44_P393852  | 9.933E-03 | 0.476 |
| <i>Dclk1</i>        | A_44_P419275  | 1.055E-03 | 0.477 |
| <i>Pcsk4</i>        | A_64_P021028  | 7.473E-03 | 0.477 |
| <i>Mmp13</i>        | A_42_P606126  | 2.387E-03 | 0.477 |
| <i>Kihl1</i>        | A_64_P121346  | 2.491E-02 | 0.477 |
| <i>Adcy8</i>        | A_42_P466362  | 1.521E-02 | 0.479 |
| <i>Itga6</i>        | A_44_P187056  | 3.136E-02 | 0.479 |
| <i>SNORA42</i>      | A_44_P187056  | 3.136E-02 | 0.479 |
| <i>Myadm</i>        | A_64_P161581  | 2.234E-02 | 0.479 |
| <i>Rarg</i>         | A_43_P16284   | 1.225E-04 | 0.480 |
| <i>Galnt6</i>       | A_64_P005080  | 5.681E-03 | 0.482 |
| <i>Sf3b4</i>        | A_42_P828934  | 1.329E-02 | 0.482 |
| <i>Pla2g4a</i>      | A_44_P477620  | 4.527E-02 | 0.482 |
| <i>Bag2</i>         | A_64_P053461  | 6.862E-03 | 0.482 |
| <i>Camk1g</i>       | A_64_P075087  | 1.207E-02 | 0.483 |
| <i>Atp11b</i>       | A_44_P554577  | 1.017E-02 | 0.483 |
| <i>Vom1r32</i>      | A_64_P105500  | 3.808E-02 | 0.483 |
| <i>Tmem200a</i>     | A_44_P620941  | 1.830E-03 | 0.483 |
| <i>Nxph3</i>        | A_64_P070445  | 1.109E-02 | 0.484 |
| <i>Ncam2</i>        | A_64_P088650  | 1.969E-02 | 0.484 |
| <i>Isyna1</i>       | A_44_P1008950 | 3.380E-02 | 0.486 |
| <i>Slc4a7</i>       | A_44_P445238  | 1.422E-02 | 0.486 |
| <i>Sla</i>          | A_64_P104282  | 3.978E-02 | 0.487 |
| <i>Kif18a</i>       | A_44_P238927  | 5.053E-03 | 0.487 |
| <i>Cdca4</i>        | A_44_P962936  | 1.506E-02 | 0.489 |
| <i>Olr889</i>       | A_64_P005396  | 1.913E-02 | 0.490 |
| <i>Creb3l1</i>      | A_64_P041223  | 4.992E-03 | 0.490 |
| <i>Man1a1</i>       | A_44_P273734  | 5.384E-03 | 0.490 |
| <i>Krt28</i>        | A_64_P081100  | 2.107E-02 | 0.491 |
| <i>Spry4</i>        | A_43_P10102   | 2.632E-02 | 0.491 |
| <i>Tp53</i>         | A_64_P113635  | 3.329E-03 | 0.492 |
| <i>LOC690460</i>    | A_64_P051528  | 1.688E-02 | 0.492 |
| <i>Lgi2</i>         | A_44_P557673  | 1.504E-02 | 0.493 |
| <i>Ism1</i>         | A_64_P096096  | 1.802E-02 | 0.493 |
| <i>Tmem2</i>        | A_44_P396040  | 3.674E-03 | 0.494 |
| <i>Med12</i>        | A_44_P222710  | 4.307E-03 | 0.494 |
| <i>Apex2</i>        | A_44_P558652  | 3.414E-03 | 0.494 |
| <i>Gpr176</i>       | A_44_P110966  | 5.388E-03 | 0.494 |
| <i>Cd19</i>         | A_64_P006898  | 4.329E-03 | 0.495 |
| <i>Kat2a</i>        | A_44_P478570  | 1.187E-02 | 0.496 |
| <i>Hist1h2ail1</i>  | A_42_P755367  | 4.966E-03 | 0.496 |

|                       |               |           |       |
|-----------------------|---------------|-----------|-------|
| <i>RGD1561114</i>     | A_64_P012158  | 3.996E-03 | 0.496 |
| <i>Fosl2</i>          | A_64_P065063  | 2.234E-03 | 0.497 |
| <i>Siah2</i>          | A_44_P503232  | 6.795E-03 | 0.497 |
| <i>Hip1r</i>          | A_44_P151744  | 2.769E-03 | 0.497 |
| <i>Cacna2d1</i>       | A_64_P093812  | 2.925E-03 | 0.497 |
| <i>Pou4f3</i>         | A_64_P108165  | 6.362E-03 | 0.498 |
| <i>Papss2</i>         | A_64_P038852  | 3.065E-02 | 0.498 |
| <i>Trim40</i>         | A_64_P150956  | 3.466E-02 | 0.499 |
| <i>Aoc2-ps1</i>       | A_64_P043986  | 3.652E-02 | 0.499 |
| <i>Olr1084</i>        | A_44_P278479  | 1.692E-02 | 0.499 |
| <i>Prok2</i>          | A_64_P058060  | 5.968E-03 | 0.499 |
| <i>Postn</i>          | A_44_P525235  | 1.583E-02 | 2.006 |
| <i>Fcer1a</i>         | A_64_P052825  | 7.895E-03 | 2.007 |
| <i>Sertad4</i>        | A_42_P637122  | 6.413E-03 | 2.011 |
| <i>Cbln1</i>          | A_64_P042495  | 1.812E-02 | 2.016 |
| <i>AC130970.1</i>     | A_64_P121051  | 4.122E-02 | 2.017 |
| <i>Ak2</i>            | A_64_P032604  | 1.960E-03 | 2.017 |
| <i>Nudt15</i>         | A_64_P142046  | 9.471E-04 | 2.021 |
| <i>Fsd1l</i>          | A_44_P154554  | 4.535E-03 | 2.022 |
| <i>Mbp</i>            | A_64_P017160  | 1.079E-03 | 2.022 |
| <i>Faah</i>           | A_64_P128667  | 1.711E-02 | 2.026 |
| <i>LOC100911581</i>   | A_64_P128667  | 1.711E-02 | 2.026 |
| <i>Ptpr</i>           | A_43_P15228   | 4.578E-02 | 2.028 |
| <i>Elavl4</i>         | A_44_P941612  | 2.606E-02 | 2.031 |
| <i>Raet1l</i>         | A_64_P020970  | 2.302E-02 | 2.032 |
| <i>Scd</i>            | A_64_P085530  | 2.467E-02 | 2.034 |
| <i>Prkch</i>          | A_64_P019638  | 2.835E-04 | 2.035 |
| <i>Jade1</i>          | A_64_P120065  | 5.482E-03 | 2.036 |
| <i>Kcna2</i>          | A_44_P217295  | 4.386E-03 | 2.037 |
| <i>Insl6</i>          | A_64_P120070  | 2.578E-02 | 2.038 |
| <i>Tmem173</i>        | A_43_P17022   | 1.159E-02 | 2.038 |
| <i>Stim2</i>          | A_64_P026266  | 4.628E-03 | 2.039 |
| <i>Slitrk6</i>        | A_64_P129662  | 2.169E-03 | 2.039 |
| <i>Cyp1a1</i>         | A_44_P321009  | 3.355E-02 | 2.044 |
| <i>Plag1</i>          | A_64_P081546  | 7.909E-03 | 2.047 |
| <i>AABR07044407.1</i> | A_42_P550914  | 2.633E-02 | 2.049 |
| <i>AC094348.1</i>     | A_42_P550914  | 2.633E-02 | 2.049 |
| <i>LOC103694381</i>   | A_42_P550914  | 2.633E-02 | 2.049 |
| <i>Ltb</i>            | A_42_P550914  | 2.633E-02 | 2.049 |
| <i>Lep</i>            | A_64_P085566  | 1.417E-02 | 2.051 |
| <i>LOC688801</i>      | A_64_P067938  | 3.873E-03 | 2.051 |
| <i>Samt3</i>          | A_64_P057412  | 2.158E-02 | 2.053 |
| <i>Cidec</i>          | A_44_P714007  | 1.079E-02 | 2.053 |
| <i>RGD1307537</i>     | A_64_P076018  | 1.281E-02 | 2.061 |
| <i>Tbata</i>          | A_44_P1002317 | 2.071E-02 | 2.064 |

|                       |               |           |       |
|-----------------------|---------------|-----------|-------|
| <i>Hpn</i>            | A_64_P134744  | 2.669E-02 | 2.065 |
| <i>Tshz3</i>          | A_44_P577233  | 6.815E-04 | 2.072 |
| <i>Nppa</i>           | A_44_P317600  | 9.496E-03 | 2.074 |
| <i>Tfap4</i>          | A_64_P098031  | 6.742E-04 | 2.077 |
| <i>Tm7sf2</i>         | A_64_P083888  | 1.644E-02 | 2.077 |
| <i>Pdp2</i>           | A_64_P097078  | 2.441E-02 | 2.081 |
| <i>Dok4</i>           | A_44_P310581  | 4.802E-03 | 2.084 |
| <i>Tas2r120</i>       | A_64_P101228  | 4.973E-02 | 2.086 |
| <i>Dixdc1</i>         | A_42_P454311  | 2.257E-02 | 2.088 |
| <i>Ski</i>            | A_64_P060531  | 6.780E-04 | 2.088 |
| <i>Mir3099</i>        | A_64_P014703  | 2.861E-02 | 2.093 |
| <i>Tgm6</i>           | A_64_P163277  | 2.114E-03 | 2.093 |
| <i>Arg1</i>           | A_42_P758222  | 1.570E-02 | 2.095 |
| <i>Olr39</i>          | A_44_P146753  | 2.319E-03 | 2.095 |
| <i>LOC686683</i>      | A_64_P060485  | 2.090E-02 | 2.095 |
| <i>Adamts14</i>       | A_44_P475919  | 3.053E-02 | 2.096 |
| <i>Pthr2</i>          | A_64_P081217  | 5.110E-04 | 2.097 |
| <i>Slc30a2</i>        | A_44_P1004790 | 2.673E-02 | 2.102 |
| <i>Tlcd1</i>          | A_64_P059964  | 2.129E-02 | 2.103 |
| <i>Pebp4</i>          | A_64_P022452  | 1.709E-02 | 2.104 |
| <i>Ahrr</i>           | A_64_P011324  | 2.514E-02 | 2.105 |
| <i>Ctsm</i>           | A_64_P112230  | 2.457E-02 | 2.105 |
| <i>AABR07016578.1</i> | A_44_P255415  | 1.938E-03 | 2.105 |
| <i>LOC100910798</i>   | A_64_P392018  | 2.147E-02 | 2.107 |
| <i>Pecam1</i>         | A_42_P826191  | 3.385E-02 | 2.108 |
| <i>Lama3</i>          | A_44_P386579  | 3.142E-02 | 2.114 |
| <i>Abcc2</i>          | A_43_P11580   | 7.268E-03 | 2.116 |
| <i>Ccdc71l</i>        | A_64_P073043  | 1.214E-04 | 2.121 |
| <i>Zbed5</i>          | A_44_P503669  | 6.484E-04 | 2.122 |
| <i>Vom2r75</i>        | A_64_P038026  | 2.486E-02 | 2.123 |
| <i>Vom1r71</i>        | A_64_P067837  | 4.570E-02 | 2.129 |
| <i>Kcnj1</i>          | A_64_P395073  | 9.908E-03 | 2.134 |
| <i>Rab22a</i>         | A_42_P713239  | 7.687E-03 | 2.135 |
| <i>Pex26</i>          | A_64_P126291  | 3.141E-02 | 2.138 |
| <i>Slc9b2</i>         | A_64_P151756  | 2.047E-02 | 2.139 |
| <i>Ubd</i>            | A_42_P602724  | 2.060E-02 | 2.145 |
| <i>Rps6ka5</i>        | A_42_P701779  | 3.304E-03 | 2.147 |
| <i>Homez</i>          | A_44_P428467  | 1.235E-02 | 2.147 |
| <i>Aunip</i>          | A_64_P005254  | 6.209E-03 | 2.147 |
| <i>Tmem140</i>        | A_64_P108339  | 5.911E-04 | 2.150 |
| <i>Erich5</i>         | A_64_P089445  | 1.611E-02 | 2.155 |
| <i>Birc7</i>          | A_64_P075008  | 4.780E-03 | 2.161 |
| <i>Fam209a</i>        | A_44_P448030  | 2.608E-02 | 2.161 |
| <i>Nppc</i>           | A_44_P240696  | 8.791E-03 | 2.172 |
| <i>Asb9</i>           | A_64_P003219  | 3.357E-02 | 2.176 |



|                       |              |           |       |
|-----------------------|--------------|-----------|-------|
| <i>Klri1</i>          | A_64_P159833 | 3.098E-02 | 2.177 |
| <i>Epn3</i>           | A_64_P150256 | 1.056E-02 | 2.178 |
| <i>Kcnmb4</i>         | A_64_P147214 | 2.758E-03 | 2.179 |
| <i>Slc6a3</i>         | A_64_P063214 | 4.069E-02 | 2.180 |
| <i>Fcrlb</i>          | A_64_P105422 | 3.049E-02 | 2.181 |
| <i>Apoh</i>           | A_44_P555201 | 9.762E-03 | 2.186 |
| <i>Tacr2</i>          | A_43_P13083  | 2.458E-02 | 2.192 |
| <i>Arhgap8</i>        | A_64_P039342 | 1.897E-02 | 2.194 |
| <i>RGD1310081</i>     | A_64_P038634 | 1.168E-02 | 2.198 |
| <i>LOC100910957</i>   | A_64_P160869 | 2.278E-03 | 2.206 |
| <i>Rn50_5_0009.1</i>  | A_64_P160869 | 2.278E-03 | 2.206 |
| <i>Bbc3</i>           | A_44_P437945 | 2.696E-02 | 2.206 |
| <i>Slc38a4</i>        | A_43_P13127  | 4.034E-02 | 2.214 |
| <i>Nipa3</i>          | A_64_P101234 | 1.355E-02 | 2.218 |
| <i>LOC100909481</i>   | A_64_P137285 | 3.584E-02 | 2.221 |
| <i>Drgx</i>           | A_64_P005391 | 2.907E-02 | 2.224 |
| <i>Olr201</i>         | A_44_P111786 | 2.169E-02 | 2.231 |
| <i>Ddc</i>            | A_43_P14910  | 1.356E-03 | 2.232 |
| <i>RGD1561185</i>     | A_44_P974207 | 1.387E-02 | 2.236 |
| <i>Ii7</i>            | A_44_P402578 | 1.235E-02 | 2.242 |
| <i>LOC108348074</i>   | A_64_P093184 | 5.191E-03 | 2.249 |
| <i>Aim2</i>           | A_44_P227046 | 2.740E-02 | 2.249 |
| <i>Mgat4c</i>         | A_44_P419855 | 3.041E-02 | 2.253 |
| <i>RGD1563714</i>     | A_64_P362701 | 1.301E-02 | 2.256 |
| <i>AABR07043200.1</i> | A_64_P080580 | 4.999E-02 | 2.257 |
| <i>Nectin4</i>        | A_44_P915843 | 2.934E-02 | 2.262 |
| <i>Rasgef1c</i>       | A_44_P577108 | 1.233E-02 | 2.267 |
| <i>AA926063</i>       | A_64_P076342 | 9.273E-03 | 2.271 |
| <i>Ppp1r17</i>        | A_44_P379347 | 2.738E-02 | 2.272 |
| <i>Plcx2</i>          | A_44_P829145 | 1.709E-02 | 2.272 |
| <i>Skap2</i>          | A_43_P13111  | 2.630E-04 | 2.275 |
| <i>Olr127</i>         | A_44_P245393 | 6.292E-03 | 2.280 |
| <i>Kctd4</i>          | A_44_P476810 | 4.970E-03 | 2.297 |
| <i>Psd4</i>           | A_44_P562505 | 1.236E-03 | 2.310 |
| <i>Cryga</i>          | A_64_P024841 | 3.021E-03 | 2.310 |
| <i>AABR07043449.1</i> | A_64_P112181 | 4.904E-02 | 2.313 |
| <i>Fcrl1</i>          | A_64_P086289 | 1.873E-02 | 2.319 |
| <i>Cntn2</i>          | A_44_P434271 | 1.659E-04 | 2.322 |
| <i>Olr1767</i>        | A_64_P113560 | 4.437E-03 | 2.331 |
| <i>Hrasls</i>         | A_42_P834031 | 2.903E-02 | 2.336 |
| <i>AABR07010155.1</i> | A_64_P040885 | 1.948E-02 | 2.339 |
| <i>Pabpc1l</i>        | A_64_P021380 | 4.365E-02 | 2.342 |
| <i>Mdga1</i>          | A_43_P22225  | 1.236E-03 | 2.354 |
| <i>Gkn2</i>           | A_64_P089950 | 7.835E-03 | 2.355 |
| <i>Cfap97</i>         | A_43_P21680  | 7.713E-03 | 2.355 |

|                     |               |           |       |
|---------------------|---------------|-----------|-------|
| <i>LOC103692019</i> | A_64_P145092  | 1.580E-02 | 2.359 |
| <i>Olr1240</i>      | A_64_P145092  | 1.580E-02 | 2.359 |
| <i>Aldob</i>        | A_64_P028853  | 6.223E-04 | 2.362 |
| <i>Wfdc5</i>        | A_64_P099710  | 2.145E-02 | 2.363 |
| <i>Fn3k</i>         | A_64_P042885  | 4.832E-03 | 2.364 |
| <i>Reg3g</i>        | A_44_P273839  | 3.240E-02 | 2.366 |
| <i>Kcnk13</i>       | A_44_P506980  | 7.370E-04 | 2.372 |
| <i>Cd53</i>         | A_64_P120941  | 3.170E-02 | 2.404 |
| <i>Cd27</i>         | A_64_P102935  | 4.886E-02 | 2.405 |
| <i>Dnah12</i>       | A_43_P16203   | 7.222E-03 | 2.415 |
| <i>Smcp</i>         | A_42_P726363  | 1.192E-02 | 2.425 |
| <i>Cst6</i>         | A_64_P150876  | 2.748E-03 | 2.426 |
| <i>Pde1a</i>        | A_43_P12467   | 7.029E-03 | 2.428 |
| <i>RGD1560510</i>   | A_44_P199107  | 3.974E-02 | 2.432 |
| <i>Medag</i>        | A_44_P288241  | 4.121E-02 | 2.439 |
| <i>Runx1t1</i>      | A_64_P086784  | 3.557E-02 | 2.441 |
| <i>Pjvk</i>         | A_44_P382274  | 3.224E-02 | 2.443 |
| <i>Dennd2d</i>      | A_42_P465144  | 1.168E-02 | 2.445 |
| <i>LOC685067</i>    | A_64_P164508  | 1.913E-02 | 2.472 |
| <i>RGD1559459</i>   | A_64_P072638  | 1.314E-02 | 2.474 |
| <i>Atp12a</i>       | A_42_P684885  | 5.682E-04 | 2.479 |
| <i>Klk1c10</i>      | A_44_P208133  | 3.390E-02 | 2.483 |
| <i>Btnl5</i>        | A_64_P165267  | 1.614E-02 | 2.488 |
| <i>Mfsd7</i>        | A_64_P015335  | 3.001E-02 | 2.495 |
| <i>Cage1</i>        | A_64_P072748  | 1.263E-03 | 2.498 |
| <i>L1td1</i>        | A_64_P136635  | 4.176E-02 | 2.510 |
| <i>Vom1r52</i>      | A_64_P136635  | 4.176E-02 | 2.510 |
| <i>Wfdc3</i>        | A_44_P1007870 | 2.680E-02 | 2.515 |
| <i>Zp2</i>          | A_44_P124733  | 4.644E-02 | 2.526 |
| <i>LOC687119</i>    | A_64_P006172  | 4.810E-02 | 2.529 |
| <i>Opn4</i>         | A_64_P131151  | 4.312E-03 | 2.560 |
| <i>Gal</i>          | A_42_P614175  | 4.107E-02 | 2.569 |
| <i>Nos1</i>         | A_64_P105620  | 6.325E-04 | 2.570 |
| <i>Hmcn2</i>        | A_64_P101908  | 3.991E-03 | 2.571 |
| <i>LOC683422</i>    | A_64_P121489  | 7.248E-03 | 2.576 |
| <i>Tex26</i>        | A_44_P605755  | 6.266E-03 | 2.617 |
| <i>N4bp2l1</i>      | A_44_P215253  | 8.060E-03 | 2.633 |
| <i>Olr1353</i>      | A_44_P351252  | 5.616E-03 | 2.654 |
| <i>Cpa6</i>         | A_44_P372998  | 1.525E-02 | 2.655 |
| <i>Abca8</i>        | A_43_P17925   | 2.691E-03 | 2.659 |
| <i>Ankrd35</i>      | A_44_P548426  | 2.712E-05 | 2.666 |
| <i>Slc44a5</i>      | A_44_P386965  | 6.355E-03 | 2.669 |
| <i>Runx2</i>        | A_64_P051312  | 4.620E-02 | 2.677 |
| <i>Slc14a2</i>      | A_43_P12032   | 1.678E-03 | 2.681 |
| <i>Cd55</i>         | A_64_P127808  | 5.542E-04 | 2.688 |

|                       |              |           |       |
|-----------------------|--------------|-----------|-------|
| <i>Btn3a2</i>         | A_44_P119371 | 6.884E-03 | 2.719 |
| <i>AABR07043200.1</i> | A_64_P152800 | 4.504E-02 | 2.722 |
| <i>Kctd8</i>          | A_64_P048521 | 2.748E-02 | 2.727 |
| <i>Myo15a</i>         | A_44_P682817 | 4.203E-03 | 2.727 |
| <i>Pik3ip1</i>        | A_64_P019280 | 3.067E-03 | 2.729 |
| <i>Flrt3</i>          | A_44_P378742 | 5.702E-03 | 2.747 |
| <i>Ttc22</i>          | A_64_P098334 | 1.984E-03 | 2.789 |
| <i>RT1-Db1</i>        | A_64_P134927 | 5.970E-04 | 2.790 |
| <i>LOC685067</i>      | A_64_P107589 | 1.696E-02 | 2.810 |
| <i>Wnt16</i>          | A_64_P092782 | 6.177E-03 | 2.813 |
| <i>Txnip</i>          | A_44_P237621 | 9.433E-03 | 2.819 |
| <i>LOC689230</i>      | A_44_P288881 | 2.430E-02 | 2.859 |
| <i>Gimap8</i>         | A_64_P030392 | 9.172E-03 | 2.877 |
| <i>Ascl4</i>          | A_64_P023275 | 5.048E-03 | 2.883 |
| <i>Olr663</i>         | A_64_P119537 | 2.115E-02 | 2.897 |
| <i>Csrp2</i>          | A_42_P727191 | 1.683E-03 | 2.901 |
| <i>Mt-nd6</i>         | A_64_P123361 | 9.255E-03 | 2.905 |
| <i>Lrtm2</i>          | A_44_P917327 | 4.266E-04 | 2.916 |
| <i>Abhd11os</i>       | A_64_P060938 | 3.172E-03 | 2.939 |
| <i>Olr6</i>           | A_64_P093561 | 2.472E-02 | 2.941 |
| <i>Otop2</i>          | A_64_P082718 | 2.299E-03 | 2.986 |
| <i>Kif28p</i>         | A_64_P079676 | 3.908E-03 | 2.991 |
| <i>Plcx2</i>          | A_44_P215917 | 4.824E-03 | 3.004 |
| <i>Anln1</i>          | A_44_P178108 | 1.123E-03 | 3.020 |
| <i>Gucy2c</i>         | A_44_P837219 | 3.740E-02 | 3.030 |
| <i>Ghrhr</i>          | A_43_P11586  | 2.171E-02 | 3.068 |
| <i>Rsad2</i>          | A_64_P114193 | 1.278E-02 | 3.130 |
| <i>Bicd2</i>          | A_64_P017577 | 4.020E-03 | 3.144 |
| <i>RGD1562660</i>     | A_64_P118698 | 8.033E-03 | 3.156 |
| <i>Majin</i>          | A_64_P098591 | 4.489E-03 | 3.162 |
| <i>AABR07068046.1</i> | A_64_P105432 | 3.359E-02 | 3.181 |
| <i>Cd34</i>           | A_44_P342271 | 4.895E-02 | 3.188 |
| <i>Rspo3</i>          | A_43_P22653  | 1.413E-02 | 3.198 |
| <i>Krt27</i>          | A_64_P096398 | 6.439E-03 | 3.213 |
| <i>Chrm2</i>          | A_64_P267159 | 1.578E-02 | 3.220 |
| <i>Ankrd36</i>        | A_44_P287956 | 1.725E-02 | 3.240 |
| <i>Rnf152</i>         | A_44_P776918 | 4.234E-02 | 3.281 |
| <i>LOC690784</i>      | A_64_P007452 | 2.037E-02 | 3.294 |
| <i>Olr602</i>         | A_64_P036895 | 1.984E-02 | 3.299 |
| <i>Gprc5c</i>         | A_64_P132981 | 4.942E-03 | 3.388 |
| <i>LOC100910837</i>   | A_64_P124723 | 4.026E-02 | 3.397 |
| <i>Olr1436</i>        | A_64_P124723 | 4.026E-02 | 3.397 |
| <i>Asip</i>           | A_64_P004126 | 6.366E-03 | 3.402 |
| <i>Dlx1</i>           | A_64_P007749 | 9.415E-04 | 3.431 |
| <i>Tmem106a</i>       | A_44_P992056 | 3.417E-02 | 3.502 |

|                      |               |           |       |
|----------------------|---------------|-----------|-------|
| <i>Serp1b1b</i>      | A_44_P323754  | 4.196E-04 | 3.512 |
| <i>Grm1</i>          | A_43_P15263   | 1.568E-02 | 3.557 |
| <i>Rn50_6_1181.1</i> | A_64_P052957  | 4.814E-02 | 3.570 |
| <i>Fcgr2a</i>        | A_42_P735417  | 8.712E-03 | 3.574 |
| <i>Rasa13</i>        | A_44_P236761  | 8.948E-03 | 3.588 |
| <i>Clec4b2</i>       | A_44_P213269  | 9.169E-03 | 3.604 |
| <i>Thrsp</i>         | A_43_P11520   | 1.796E-02 | 3.618 |
| <i>Klk1c3</i>        | A_44_P374824  | 1.137E-02 | 3.632 |
| <i>Anln</i>          | A_64_P022412  | 2.185E-03 | 3.633 |
| <i>Anln1</i>         | A_64_P022412  | 2.185E-03 | 3.633 |
| <i>Hrk</i>           | A_42_P768355  | 8.539E-07 | 3.713 |
| <i>Pkhd1</i>         | A_44_P548798  | 4.567E-02 | 3.719 |
| <i>Kctd4</i>         | A_64_P083149  | 8.375E-05 | 3.726 |
| <i>Ces1d</i>         | A_64_P148413  | 6.638E-04 | 3.728 |
| <i>IL34</i>          | A_64_P011929  | 3.552E-04 | 3.732 |
| <i>Cdh26</i>         | A_64_P033959  | 8.682E-04 | 3.741 |
| <i>LOC497938</i>     | A_64_P064684  | 1.305E-02 | 3.767 |
| <i>Grem2</i>         | A_43_P13931   | 1.217E-02 | 3.837 |
| <i>Cxcl9</i>         | A_44_P1043157 | 5.133E-03 | 3.851 |
| <i>Hmgb4</i>         | A_64_P025853  | 2.506E-03 | 3.906 |
| <i>Slc22a13</i>      | A_64_P007988  | 1.056E-02 | 4.006 |
| <i>LOC100909524</i>  | A_64_P083369  | 1.572E-03 | 4.165 |
| <i>Serpina10</i>     | A_64_P083369  | 1.572E-03 | 4.165 |
| <i>Rrlt</i>          | A_64_P327121  | 1.593E-02 | 4.182 |
| <i>Kcnj1</i>         | A_64_P067153  | 2.651E-02 | 4.201 |
| <i>Rnf152</i>        | A_64_P084578  | 3.092E-02 | 4.536 |
| <i>Fzd6</i>          | A_64_P109373  | 7.191E-04 | 4.555 |
| <i>Ces1f</i>         | A_64_P005108  | 1.335E-02 | 4.774 |
| <i>Dsc1</i>          | A_44_P363559  | 3.807E-03 | 5.014 |
| <i>Fam26e</i>        | A_64_P084153  | 7.307E-04 | 5.019 |
| <i>Myrf1</i>         | A_64_P155810  | 6.209E-05 | 5.747 |
| <i>Slco6c1</i>       | A_44_P332483  | 4.008E-03 | 5.909 |
| <i>Rn50_X_0681.1</i> | A_64_P040019  | 3.918E-04 | 6.080 |
| <i>Pkd2l2</i>        | A_44_P173289  | 3.176E-03 | 6.137 |
| <i>Gpr139</i>        | A_64_P098818  | 1.239E-04 | 8.126 |

**Table S3. Selected miRNAs for profiling and their putative targets among transcripts found altered upon suppression of synaptic activity for 9h.** The 16 miRNAs were predicted by at least two algorithms (miRanda, miRTarget2 or TargetScan) to bind to transcripts regulated in response to synaptic activity suppression.

| <b>Selected miRNAs</b>   | <b>Sequence</b>           | <b>Putative targets</b>                                                                                        |
|--------------------------|---------------------------|----------------------------------------------------------------------------------------------------------------|
| <b>rno-miR-19a-3p</b>    | UGUGCAAUUCUAUGCAAACUGA    | <i>Crebrf, Lrrtm2, Ptk2B, Rhob, Arc, Itga6, Spry4</i>                                                          |
| <b>rno-miR-19b-3p</b>    | UGUGCAAUCCAUGCAAACUGA     | <i>Crebrf, Lrrtm2, Ptk2B, Rhob, Arc, Itga6, Spry4</i>                                                          |
| <b>rno-miR-27a-3p</b>    | UUCACAGUGGCUAAGUCCGC      | <i>Cblb, Cdh11, Crebrf, Inpp5J, Neurod6, Ak2, Ckap4, Csmrp1, Eml1, Plk2, Sox7</i>                              |
| <b>rno-miR-27b-3p</b>    | UUCACAGUGGCUAAGUUCUGC     | <i>Cblb, Cdh11, Crebrf, Inpp5J, Neurod6, Ak2, Ckap4, Csmrp1, Eml1, Plk2, Sox7</i>                              |
| <b>rno-miR-103-3p</b>    | AGCAGCAUUGUACAGGGCUAUGA   | <i>Six4, Adgrl3, Ak2, Bdnf,</i>                                                                                |
| <b>rno-miR-107-3p</b>    | AGCAGCAUUGUACAGGGCUAUGA   | <i>Fzd1, Six4, Adgrl3, Ak2, Bdnf,</i>                                                                          |
| <b>rno-miR-124-3p</b>    | UAAGGCACGCGGUGAAUGCC      | <i>Calcoco1, Chrd, Clmn, Crebrf, Ctnnd1, Palm, Prkag2, Rab3d, Steap3, Six4, Wipf3, Ak2, Hipk2, Nr4a1, Sdc4</i> |
| <b>rno-miR-125b-1-3p</b> | ACGGGUUAGGCUCUUGGGAGCU    | <i>Kcnc3</i>                                                                                                   |
| <b>rno-miR-182</b>       | UUUGGCAAUGGUAGAACUCACACCG | <i>Kcnc3, Sez6l2, Arhgef3, Bdnf, Nox4, Spry4</i>                                                               |
| <b>rno-miR-186-5p</b>    | CAAAGAAUUCUCCUUUUGGGCU    | <i>Cdh11, Chrna5, Cntnap1, Crebrf, Nsg2, Sipa1l3, Adgrg2, Asz1, Il22ra2, Itga6, P2rx7</i>                      |
| <b>rno-miR-190a-5p</b>   | UGAUUUGUUUGAUUUAUUGGU     | <i>Nlgn1, Bdnf</i>                                                                                             |
| <b>rno-miR-193a-3p</b>   | AACUGGCCUACAAAGUCCAGU     | <i>Kit, Arhgap39, Csmrp1, Slc39a5</i>                                                                          |
| <b>rno-miR-218a-5p</b>   | UUGUGCUUGAUCUAACCAUGU     | <i>Hook1, Mdga1 Tac1</i>                                                                                       |
| <b>rno-miR-340-5p</b>    | UUAUAAAGCAAUGAGACUGAUU    | <i>Chrna5, Cntnap1, Nsg2, Pum1, Slc24a2</i>                                                                    |
| <b>rno-miR-495</b>       | AAACAAACAUGGUGCACUUCUU    | <i>Dnmt3a, Adgrg2, Arc, Bdnf, Gpat3, Hspa1b, Sesn3</i>                                                         |
| <b>rno-miR-544-3p</b>    | AUUCUGCAUUUUUAGCAAGCU     | <i>Adam7, Bcl11b, Camk2b, Slc24a2, Tp63</i>                                                                    |

\*Upregulated transcripts are represented in red and downregulated transcripts are represented in blue.

## References

1. Goslin K, Asmussen H, Banker G (1998) Rat hippocampal neurons in low-density culture. *Culturing Nerve Cells*, eds Banker G, Goslin K (MIT Press, Cambridge), pp 339–370. 2nd Ed.
2. Fernandes J, et al. (2014) In vitro ischemia triggers a transcriptional response to down-regulate synaptic proteins in hippocampal neurons. *PLoS One* 9(6):6–9.
3. Bardou P, Mariette J, Escudié F, Djemiel C, Klopp C (2014) jvenn: an interactive Venn diagram viewer. *BMC Bioinformatics* 15:293.
4. Ashburner M, et al. (2000) Gene ontology: tool for the unification of biology. The Gene Ontology Consortium. *Nat Genet* 25(1):25–9.
5. Betel D, Koppal A, Agius P, Sander C, Leslie C (2010) Comprehensive modeling of microRNA targets predicts functional non-conserved and non-canonical sites. *Genome Biol* 11(8):R90.
6. Friedman RC, Farh KKH, Burge CB, Bartel DP (2009) Most mammalian mRNAs are conserved targets of microRNAs. *Genome Res* 19(1):92–105.
7. Wong N, Wang X (2015) miRDB: An online resource for microRNA target prediction and functional annotations. *Nucleic Acids Res* 43(D1):D146–D152.
8. Agarwal V, Bell GW, Nam J-W, Bartel DP (2015) Predicting effective microRNA target sites in mammalian mRNAs. *Elife* 4(AUGUST2015):1–38.
9. Jiang M, Deng L, Chen G (2004) High Ca(2+)-phosphate transfection efficiency enables single neuron gene analysis. *Gene Ther* 11(17):1303–11.
10. Moore MJ, et al. (2015) miRNA-target chimeras reveal miRNA 3'-end pairing as a major determinant of Argonaute target specificity. *Nat Commun* 6(May):8864.
